# Supplementary material
Source: publisher site journal article supplement (https://www.dovepress.com/article/316304)
Supplement: Supplementary file 1 [file get_supplementary_file.php]

# Identification of Metabolism-Associated Molecular Subtypes of Chronic Obstructive Pulmonary Disease

Yuanlong Hu, Xiaomeng Cheng, Zhanjun Qiu, Xianhai Chen

**Supplementary Table 1.** Genes selected using Boruta and linear regression with various thresholds.

| Approach          | Parameter   | value   | Associated with FEV1/FVC                                                                                                                                                              | Associated with FEV1                                                                                                                              | Number of genes in union |
|-------------------|-------------|---------|---------------------------------------------------------------------------------------------------------------------------------------------------------------------------------------|---------------------------------------------------------------------------------------------------------------------------------------------------|--------------------------|
| Boruta            | pValue      | 0.01    | ADCY4, ATP6AP1, CA8, B3GALT2, ENPP1, GPX7, HDC, HSD3B7, PFKFB4, PIK3C2B, SCLY, ST6GAL1, ST8SIA1                                                                                       | ACAA1, ADCY4, HDC, AHCYL2, ENPP1, ETFA, GLA, HSD3B7, PIK3C2B, SCLY, ST6GAL1, UPB1, UPP1                                                           | 19                       |
| Boruta            | pValue      | 0.05    | ACAA1, ADCY4, ATP6AP1, CA8, CEPT1, GPX7, GSTO1, HDC, HSD3B7, MGAT5, PFKFB4, PIK3C2B, SCLY, ST6GAL1, ST8SIA1                                                                           | ADCY4, ATP6AP1, CA8, B3GALT2, ENPP1, HDC, HSD3B7, PFKFB4, PIK3C2B, SCLY, GPX7, ST6GAL1, ST8SIA1                                                   | 27                       |
| Boruta            | pValue      | 0.1     | ACAA1, ADCY4, ATP6AP1, B3GALT2, CA8, CBR1, ENPP1, GPX7, HDC, SCLY, PFKFB4, PIK3C2B, UPB1, ST6GAL1, ST8SIA1                                                                            | ACAA1, ADCY4, GLA, AHCYL2, ATP6AP1, ENPP1, ETFA, HDC, HSD3B7, MGST1, UPB1, NDUFB6, NT5E, SCLY, PFKFB4, PIK3C2B, UPP1, SGMS2, ST6GAL1              | 24                       |
| Linear regression | effect size | Top 5%  | PTDSS1, NADK, SIRT7, GAPDH, CS, FDFT1, ATP6AP1, UXS1, MAT2A, HAO1, RNMT, ADH7, CHST11, ITPKB, ACAA1, MCCC2, CRABP2, ITPK1, CEPT1, MAN1A2, TKT, ST6GAL1, SDHC, CERK, PLD2, GMPR2, RPN1 | CS, GAPDH, PTDSS1, FDFT1, SIRT7, ND2, ITPKB, UXS1, ADH7, ACAA1, NADK, HAO1, ATP6AP1, ST6GAL1, MAT2A, CALM3, TKT, MCCC2, DDOST, DPYS, RNMT, CRABP2 | 31                       |
| Linear regression | effect size | Top 10% | PTDSS1, NADK, SIRT7, GAPDH, CS, FDFT1, ATP6AP1, UXS1, MAT2A, HAO1, RNMT, ADH7, CHST11, ITPKB, ACAA1, MCCC2, CRABP2, ITPK1, CEPT1, MAN1A2, TKT,                                        | CS, GAPDH, PTDSS1, FDFT1, SIRT7, ND2, ITPKB, UXS1, ADH7, ACAA1, NADK, ATP6AP1, ST6GAL1, MAT2A, CALM3, HAO1, MCCC2, DDOST, TKT,                    | 61                       |

ST6GAL1, SDHC, CERK, DPYS, RNMT, CRABP2,  
 PLD2, GMPR2, RPN1, INPPL1, CEPT1, SDHB,  
 GALNS, TALDO1, DPYS, CERK, GMPR2, ITPK1,  
 ALDOA, GOT1, POLR2H, ALDH9A1, PLD2,  
 POLR1B, PFKFB4, KDSR, GALNT1, PDE1C, RPN1,  
 POGLUT1, PDE1C, DDOST, HS6ST2, ALDH4A1,  
 HS6ST2, CHFR, ATP6V0B, CHFR, ATP6V1E1,  
 SOAT1, KMT2D, SEPHS2, POLR1B, GOT1, GLA,  
 GPX7, ALDH4A1, PI4KB, PI4KB, PPP1R3C,  
 CHKA, OPLAH, NADSYN1, CHST11, MAN1A2  
 PPP1R3C, AGPAT2

---

**Supplementary Table 2.** Best consistent clustering models evaluated in ever parameter combination using mean silhouette score, PAC score and concordance.

| Parameter combination | Best k | 1-PAC score | Mean silhouette | concordance | Jaccard  |
|-----------------------|--------|-------------|-----------------|-------------|----------|
| ATC:kmeans            | 2      | 0.58354668  | 0.8065742       | 0.9161572   | 0.501264 |
| ATC:pam               | 2      | 0.54173067  | 0.7756717       | 0.9037904   | 0.498966 |
| MAD:kmeans            | 2      | 0.30888377  | 0.6732604       | 0.8498341   | 0.510917 |
| CV:kmeans             | 2      | 0.29625363  | 0.6595365       | 0.8497118   | 0.524707 |
| MAD:pam               | 2      | 0.24722649  | 0.5907090       | 0.8252227   | 0.50701  |
| SD:kmeans             | 2      | 0.24278887  | 0.7169657       | 0.8495197   | 0.50701  |
| SD:pam                | 2      | 0.20383171  | 0.6693103       | 0.8354934   | 0.501264 |
| CV:hclust             | 3      | 0.18276751  | 0.7336567       | 0.8337817   | 0.92284  |
| CV:pam                | 2      | 0.16734938  | 0.5797081       | 0.8052576   | 0.497817 |
| ATC:hclust            | 3      | 0.16619730  | 0.5262195       | 0.7283144   | 0.458657 |
| MAD:hclust            | 2      | 0.12698413  | 0.5422373       | 0.7888559   | 0.777829 |
| SD:hclust             | 3      | 0.07579909  | 0.4944082       | 0.7170655   | 0.912934 |

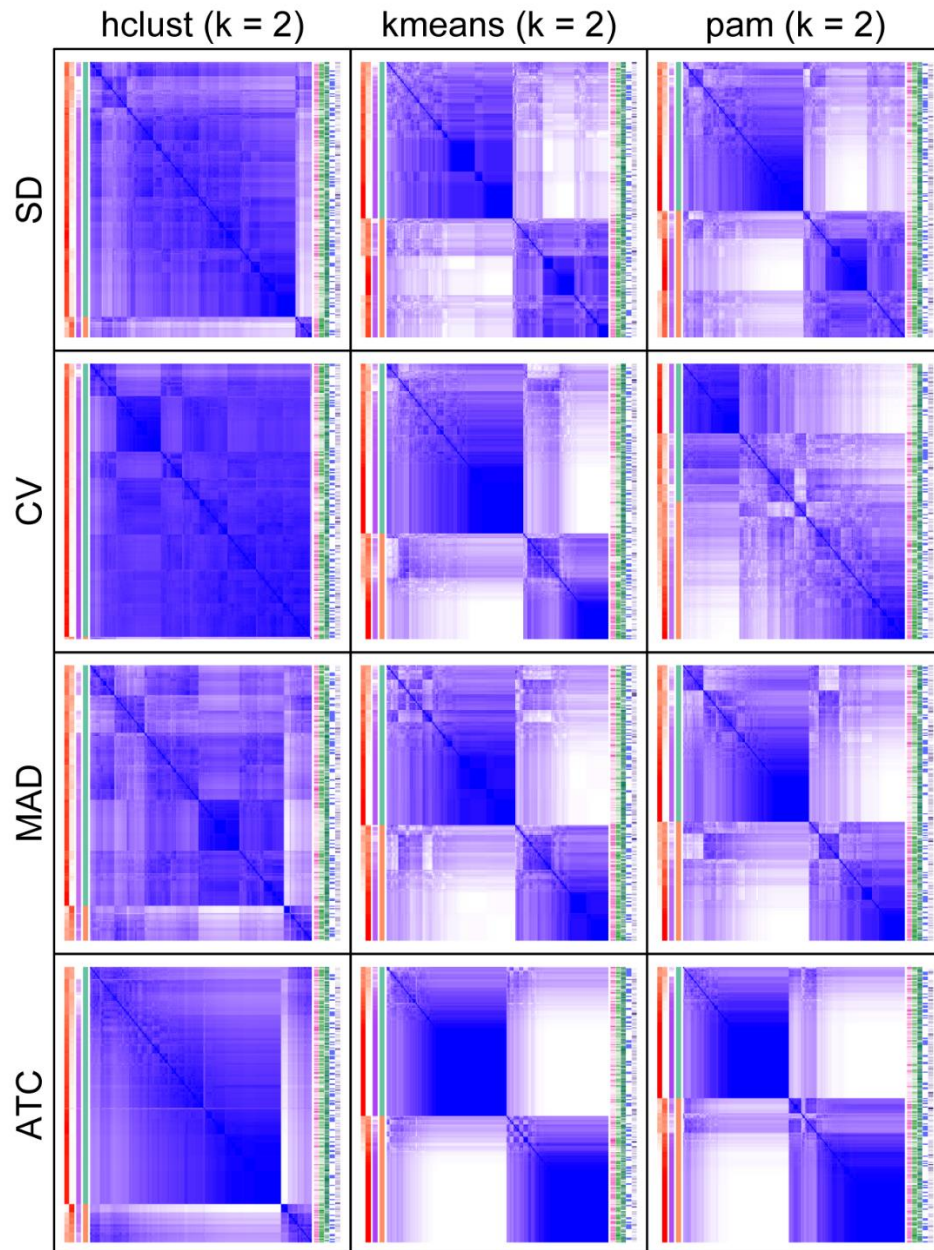

**Supplementary Figure 1.** Consensus matrix visualizing the stability with the two subtypes and various parameter combinations.

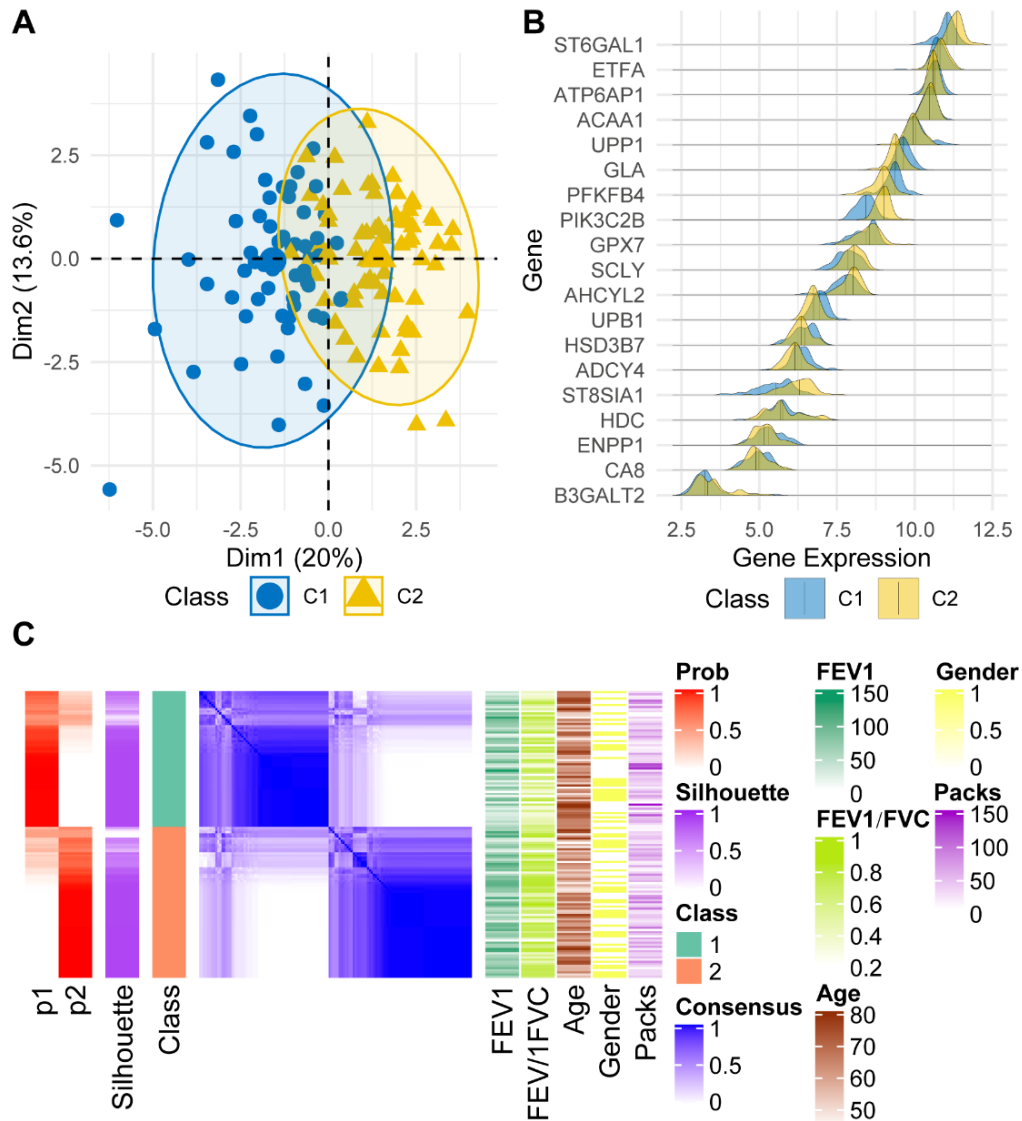

**Supplementary Figure 2. Identification of two metabolim related-subtypes in the COPDGene dataset.** (A) Principal component analysis displaying the distribution of the two subtypes in the COPDGene dataset. (B) Multiple density plot showing the distribution of 19 selected genes on the two subtypes in the COPDGene dataset. (C) Consensus matrix visualizing the stability of the two subtypes in the COPDGene dataset. The labels “p1” and “p2” refer to the probability of the sample staying in C1 and C2, respectively. The label “Prob” refers to the probability of the sample staying in the corresponding subgroup. The label “Packs” refers to the pack-years of cigarette smoking.

**Supplementary Table 3.** Difference in clinical characteristic between C1 and C2 in the ECLIPSE dataset.

| Characteristic            | N   | C1 (N = 124) <sup>1</sup> | C2 (N = 105) <sup>1</sup> | p-value <sup>2</sup> |
|---------------------------|-----|---------------------------|---------------------------|----------------------|
| <b>FEV1 (% predicted)</b> | 229 | 55 (38, 72)               | 92 (56, 108)              | <0.001***            |
| <b>FEV1/FVC</b>           | 229 | 0.46 (0.35, 0.66)         | 0.72 (0.47, 0.81)         | <0.001***            |
| <b>Age (years)</b>        | 229 | 66 (62, 70)               | 62 (57, 67)               | <0.001***            |
| <b>Gender</b>             | 229 |                           |                           | 0.6                  |
| Female                    |     | 80 (65%)                  | 72 (69%)                  |                      |
| Male                      |     | 44 (35%)                  | 33 (31%)                  |                      |
| <b>Pack-years</b>         | 229 | 38 (24, 54)               | 31 (20, 48)               | 0.060                |
| <b>GOLD Grade</b>         | 229 |                           |                           | <0.001***            |
| GOLD 0 <sup>3</sup>       |     | 28 (23%)                  | 58 (55%)                  |                      |
| GOLD 1                    |     | 1 (0.8%)                  | 2 (1.9%)                  |                      |
| GOLD 2                    |     | 42 (34%)                  | 27 (26%)                  |                      |
| GOLD 3                    |     | 43 (35%)                  | 14 (13%)                  |                      |
| GOLD 4                    |     | 10 (8.1%)                 | 4 (3.8%)                  |                      |

Note: 1 Statistics presented: median (IQR); n (%).

2 Statistical tests performed: Wilcoxon rank-sum test; chi-square test of independence; Fisher's exact test. \*\*\*, <0.001.

3 GOLD 0 was defined as FEV1 (% predicted) ≥ 80% and FEV1/FVC ≥ 0.7.

**Supplementary Table 4.** Difference in clinical characteristics between C1 and C2 in the COPDGene dataset.

| Characteristic                       | N   | C1 (N = 64) <sup>1</sup> | C2 (N = 71) <sup>1</sup> | p-value <sup>2</sup> |
|--------------------------------------|-----|--------------------------|--------------------------|----------------------|
| <b>FEV1 (% predicted)</b>            | 135 | 59 (36, 82)              | 75 (58, 92)              | 0.009**              |
| <b>FEV1/FVC</b>                      | 135 | 0.57 (0.39, 0.67)        | 0.71 (0.58, 0.76)        | <0.001***            |
| <b>Age (years)</b>                   | 135 | 65 (59, 72)              | 61 (56, 68)              | 0.083                |
| <b>Pack-years</b>                    | 135 | 41 (29, 63)              | 44 (28, 61)              | >0.9                 |
| <b>BMI (kg/m<sup>2</sup>)</b>        | 135 | 26.6 (23.8, 31.0)        | 27.3 (24.6, 31.2)        | 0.4                  |
| <b>Gender</b>                        | 135 |                          |                          | 0.3                  |
| Female                               |     | 26 (41%)                 | 36 (51%)                 |                      |
| Male                                 |     | 38 (59%)                 | 35 (49%)                 |                      |
| <b>Six-minute-walk distance (ft)</b> | 135 | 1316 (996, 1600)         | 1515 (1238, 1705)        | 0.017*               |
| <b>Emphysema (%)<sup>3</sup></b>     | 116 | 5 (2, 17)                | 1 (0, 5)                 | <0.001***            |
| <b>Gas Trapping (%)<sup>3</sup></b>  | 114 | 22 (11, 52)              | 10 (5, 30)               | 0.002**              |
| <b>Current Smoking Status</b>        | 134 |                          |                          | 0.024*               |
| No                                   |     | 53 (83%)                 | 46 (65%)                 |                      |
| Yes                                  |     | 11 (17%)                 | 24 (34%)                 |                      |
| <b>GOLD Grade</b>                    | 135 |                          |                          | 0.001**              |
| GOLD 0 <sup>4</sup>                  |     | 13 (20%)                 | 29 (41%)                 |                      |
| PRISm <sup>4</sup>                   |     | 1 (1.6%)                 | 9 (13%)                  |                      |
| GOLD 1                               |     | 6 (9.4%)                 | 1 (1.4%)                 |                      |
| GOLD 2                               |     | 18 (28%)                 | 17 (24%)                 |                      |

|                                        |            |            |           |
|----------------------------------------|------------|------------|-----------|
| GOLD 3                                 | 15 (23%)   | 10 (14%)   |           |
| GOLD 4                                 | 11 (17%)   | 5 (7.0%)   |           |
| <b>Airflow Obstruction<sup>4</sup></b> | 135        |            | <0.001*** |
| No                                     | 14 (21.9%) | 38 (53.5%) |           |
| Yes                                    | 50 (78.1%) | 33 (46.5%) |           |

Note: 1 Statistics presented: median (IQR); n (%).

2 Statistical tests performed: Wilcoxon rank-sum test; chi-square test of independence; Fisher's exact test. P-value: \*, <0.05; \*\*, <0.01; \*\*\*, <0.001.

3 Emphysema(%) was defined as percent of lung attenuation voxels below -950 Hounsfield units (HU); Gas trapping(%) was defined as the percent of lung voxels less than -856 HU on the expiratory images of the CT scan.

4 PRISm was defined as FEV1 (% predicted) <80% and FEV1/FVC  $\geq$  0.7. GOLD 0 was defined as FEV1 (% predicted)  $\geq$  80% and FEV1/FVC  $\geq$  0.7. Airflow obstruction was defined as FEV1/FVC < 0.7.

**Supplementary Table 5.** Difference in clinical characteristics between COPD and Healthy Smokers in the two datasets.

| Characteristic                       | ECLIPSE       |                        |                      | COPDGene           |                        |                      |
|--------------------------------------|---------------|------------------------|----------------------|--------------------|------------------------|----------------------|
|                                      | COPD, N = 143 | Healthy Smoker, N = 86 | P-value <sup>1</sup> | COPD, N = 83       | Healthy Smoker, N = 52 | P-value <sup>1</sup> |
| <b>Subtypes</b>                      |               |                        | <0.001***            |                    |                        | <0.001***            |
| C1                                   | 96 (67%)      | 28 (33%)               |                      | 50 (60%)           | 14 (27%)               |                      |
| C2                                   | 47 (33%)      | 58 (67%)               |                      | 33 (40%)           | 38 (73%)               |                      |
| <b>FEV1 (% predicted)</b>            | 50 (36, 62)   | 108 (101, 118)         | <0.001***            | 50 (35, 66)        | 90 (81, 104)           | <0.001***            |
| <b>FEV1/FVC (%)</b>                  | 41 (35, 52)   | 80 (76, 82)            | <0.001***            | 46 (38, 62)        | 77 (74, 79)            | <0.001***            |
| <b>Age (years)</b>                   | 65 (61, 69)   | 62 (57, 69)            | 0.002**              | 66 (59, 71)        | 60 (54, 66)            | 0.006**              |
| <b>Gender</b>                        |               |                        | >0.9                 |                    |                        | 0.2                  |
| Female                               | 95 (66%)      | 57 (66%)               |                      | 49 (59%)           | 24 (46%)               |                      |
| Male                                 | 48 (34%)      | 29 (34%)               |                      | 34 (41%)           | 28 (54%)               |                      |
| <b>Pack-years</b>                    | 42 (26, 58)   | 26 (16, 38)            | <0.001***            | 44 (34, 66)        | 38 (22, 52)            | 0.062                |
| <b>BMI (kg/m<sup>2</sup>)</b>        | --            | --                     | --                   | 27.3 (23.9, 31.2)  | 26.8 (24.4, 31.1)      | 0.8                  |
| <b>Six-minute-walk distance (ft)</b> | --            | --                     | --                   | 1,230 (970, 1,565) | 1,628 (1,460, 1,800)   | <0.001***            |
| <b>Emphysema (%)<sup>3</sup></b>     | --            | --                     | --                   | 11 (3, 20)         | 1 (0, 1)               | <0.001***            |
| <b>Gas Trapping (%)<sup>3</sup></b>  | --            | --                     | --                   | 34 (17, 58)        | 8 (4, 10)              | <0.001***            |
| <b>Current Smoking Status</b>        |               |                        | --                   |                    |                        | 0.053                |
| No                                   | --            | --                     |                      | 66 (80%)           | 33 (63%)               |                      |
| Yes                                  | --            | --                     |                      | 17 (20%)           | 18 (35%)               |                      |

Note: 1 P-value: \*\*, <0.01; \*\*\*, <0.001.

**Supplementary Table 6.** Association of subtypes with FEV1/FVC and FEV1 correcting for confounding factors.

| Correction for confounding factors | FEV1/FVC (% predicted) |                      | FEV1 (%)            |                      |
|------------------------------------|------------------------|----------------------|---------------------|----------------------|
|                                    | $\beta$ (95%CI)        | P value <sup>1</sup> | $\beta$ (95%CI)     | P value <sup>1</sup> |
| <b>ECLIPSE</b>                     |                        |                      |                     |                      |
| Age                                | 11.55(6.41, 16.69)     | 1.49e-05***          | 17.86(9.28, 26.45)  | 5.74e-05***          |
| Gender                             | 13.73(8.75, 18.72)     | 1.46e-07***          | 20.79(12.54, 29.04) | 1.34e-06***          |
| Gender+Age                         | 11.49(6.30, 16.67)     | 1.95e-05***          | 18.20(9.55, 26.86)  | 4.84e-05***          |
| <b>COPDGene</b>                    |                        |                      |                     |                      |
| Age                                | 9.93(4.35, 15.51)      | 5.91e-04***          | 11.28(1.90, 20.66)  | 0.0189*              |
| Gender                             | 10.92(5.19, 16.64)     | 2.44e-04***          | 12.43(3.00, 21.87)  | 0.0100*              |
| Gender+Age                         | 9.87(4.25, 15.48)      | 6.88e-04***          | 11.40(1.96, 20.84)  | 0.0183*              |
| BMI                                | 10.67(5.08, 16.27)     | 2.43e-04***          | 12.26 (2.86, 21.66) | 0.0110*              |
| Age+BMI                            | 9.58(4.08,15.08)       | 7.73e-04***          | 11.19(1.76, 20.62)  | 0.0204*              |
| Gender+BMI                         | 10.33(4.71,15.95)      | 3.97e-04***          | 12.24(2.75, 21.73)  | 0.0119*              |
| Age +Gender+BMI                    | 9.47(3.93, 15.00)      | 9.50e-04***          | 11.31(1.82, 20.79)  | 0.0199*              |
| Current Smoking                    | 9.70(3.96,15.43)       | 1.08e-03**           | 11.154(1.60, 20.71) | 0.0225*              |

Note: 1 P-value: \*, <0.05; \*\*, <0.01; \*\*\*, <0.001.

**Supplementary Table 7.** Gene signatures associated with exacerbation risk obtained from previous study.

| Study            | Gene signatures                                       | Association with exacerbation risk | Reference      |
|------------------|-------------------------------------------------------|------------------------------------|----------------|
| Singh D et.al.   | ITGB2, CCNA1, RHCE                                    | Positive                           | PMID: 25265030 |
| Singh D et.al.   | HLA-DQA1, HLA-DQB1, TCL6, CD200, FCRL1, FCRL2, COL4A3 | Negative                           | PMID: 25265030 |
| Morrow JD et.al. | NCALD, PPP2R2B                                        | Negative                           | PMID: 25582225 |

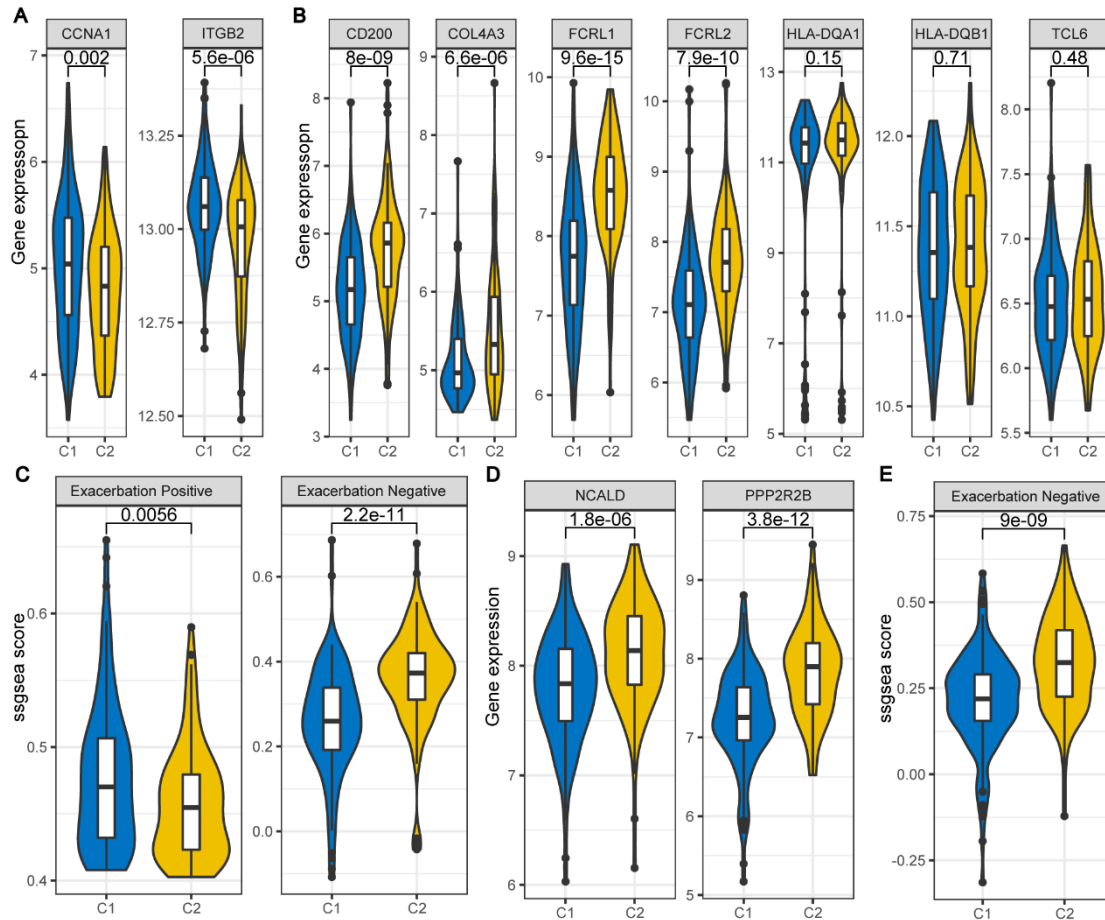

**Supplementary Figure 3. Infer the difference in exacerbation risk between C1 and C2 in the ECLIPSE dataset from the point of view of gene signatures.** (A) Difference in gene expression of gene signature from *Singh D et.al.*, which was positively associated with exacerbation risk. (B) Difference in gene expression of gene signature from *Singh D et.al.*, which was negatively associated with exacerbation risk. (C) Difference in ssGSEA scores calculated by gene signature from *Singh D et.al.* (D) Difference in gene expression of gene signature from *Morrow JD et.al.*, which was negatively associated with exacerbation risk. (E) Difference in ssGSEA score calculated by gene signature from *Morrow JD et.al.*



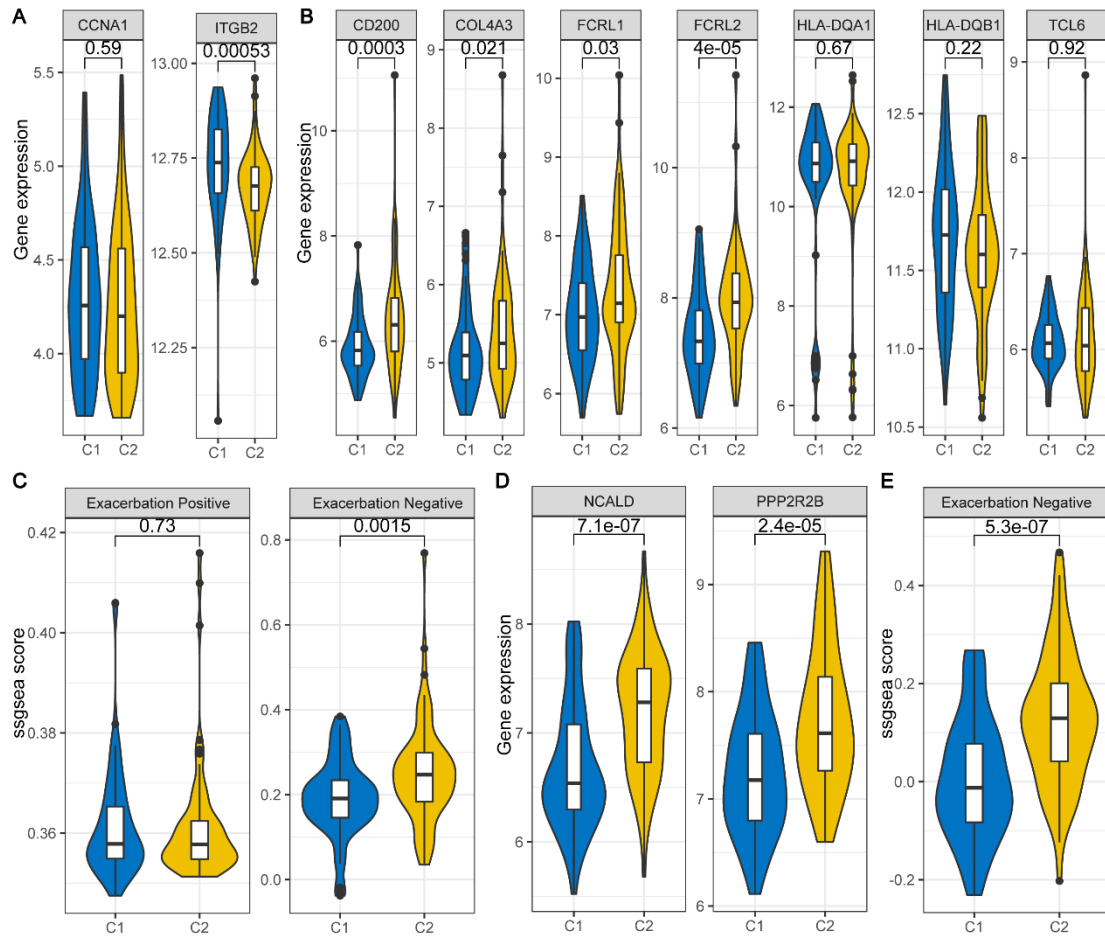

**Supplementary Figure 4. Infer the difference in exacerbation risk between C1 and C2 in the COPDGenes dataset from the point of view of gene signatures.** (A) Difference in gene expression of gene signature from *Singh D et.al.*, which was positively associated with exacerbation risk. (B) Difference in gene expression of gene signature from *Singh D et.al.*, which was negatively associated with exacerbation risk. (C) Difference in ssGSEA scores calculated by gene signature from *Singh D et.al.* (D) Difference in gene expression of gene signature from *Morrow JD et.al.*, which was negatively associated with exacerbation risk. (E) Difference in ssGSEA score calculated by gene signature from *Morrow JD et.al.*

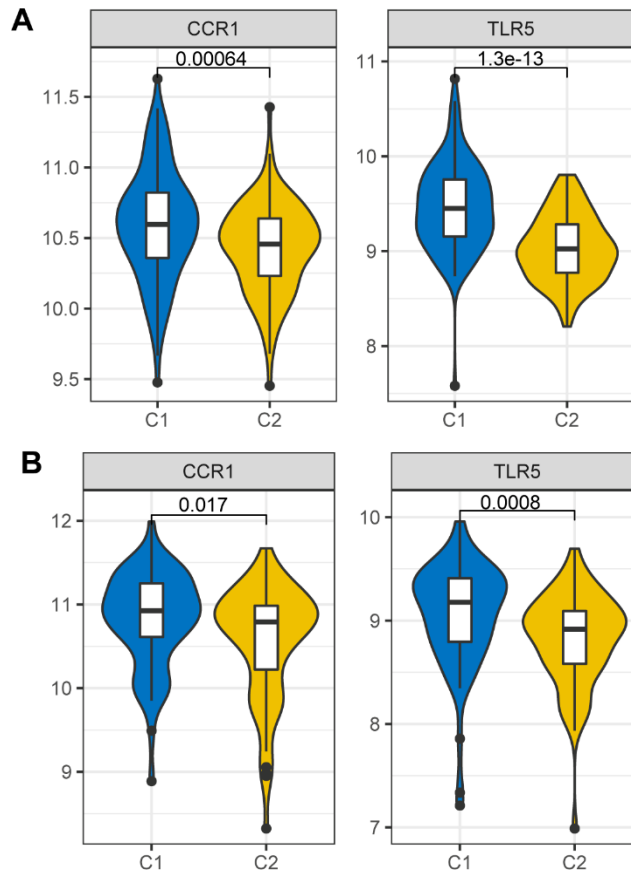

**Supplementary Figure 5.** Differences in gene expression related to FEV1 decline between C1 and C2 in the (A) ECLIPSE and (B) COPDGene datasets.

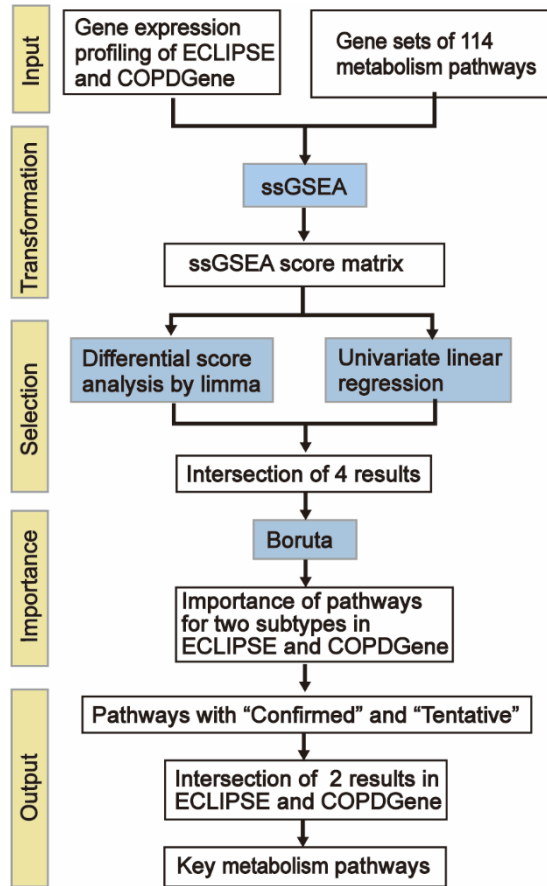

**Supplementary Figure 6.** Flow diagram depicting the processes of identifying the key pathways for the two subtypes and airway limitation.

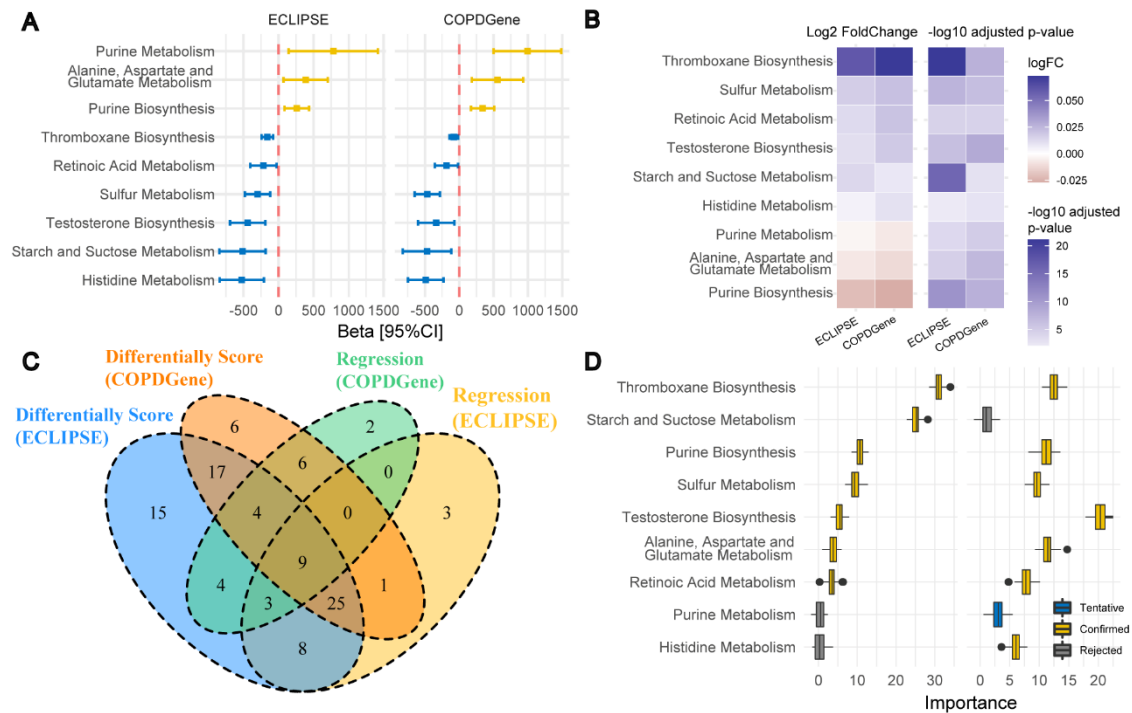

**Supplementary Figure 7.** Correlations of the COPD subtypes with FEV1-related metabolic pathways. | (A) Forest plot of association between ssGSEA scores of 9 metabolic pathways and FEV1. (B) Heatmap displaying the differences in ssGSEA scores of 9 metabolic pathways in COPD subtypes (C1 vs C2). (C) Venn diagram showing the overlapping result of univariate linear regression (ssGSEA score to FEV1) and difference analysis (C1 vs C2) in Evaluation of COPD to ECLIPSE and COPDGene datasets. (D) Boxplot showing the attribute importance of 9 metabolism pathway ssGSEA score for two COPD subtypes in ECLIPSE and COPDGene datasets based on Boruta method.

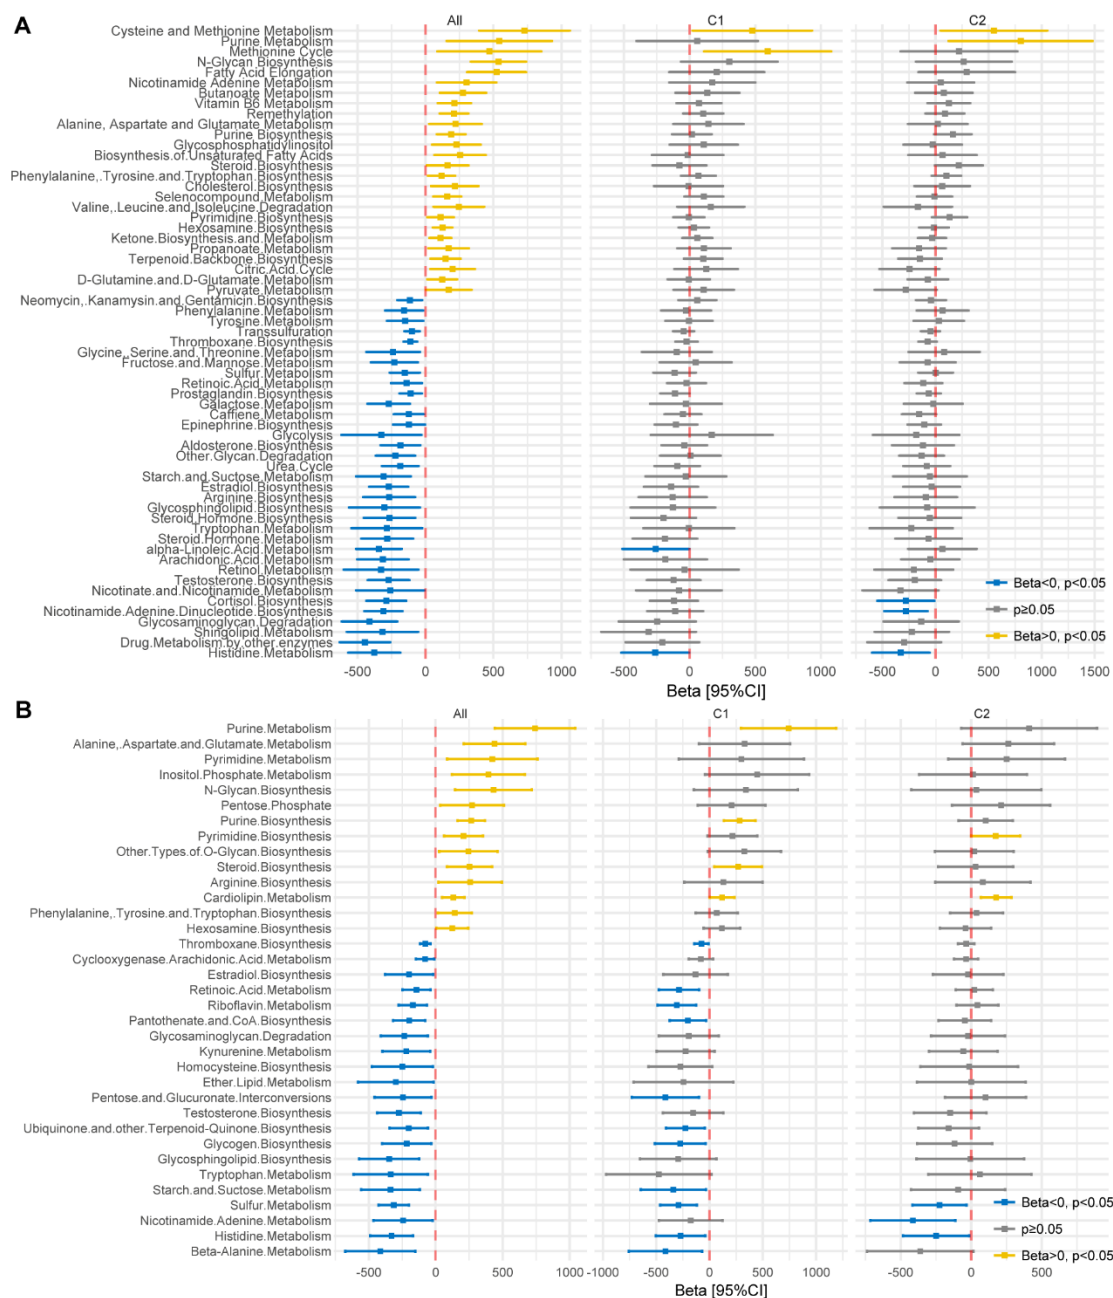

**Supplementary Figure 8.** Forest plot displaying the association between metabolic pathway ssGSEA scores of and FEV1/FVC in the (A) ECLIPSE and (B) COPDGene datasets. From left to right, the association with ssGSEA scores in whole dataset, C1 and C2 are shown.

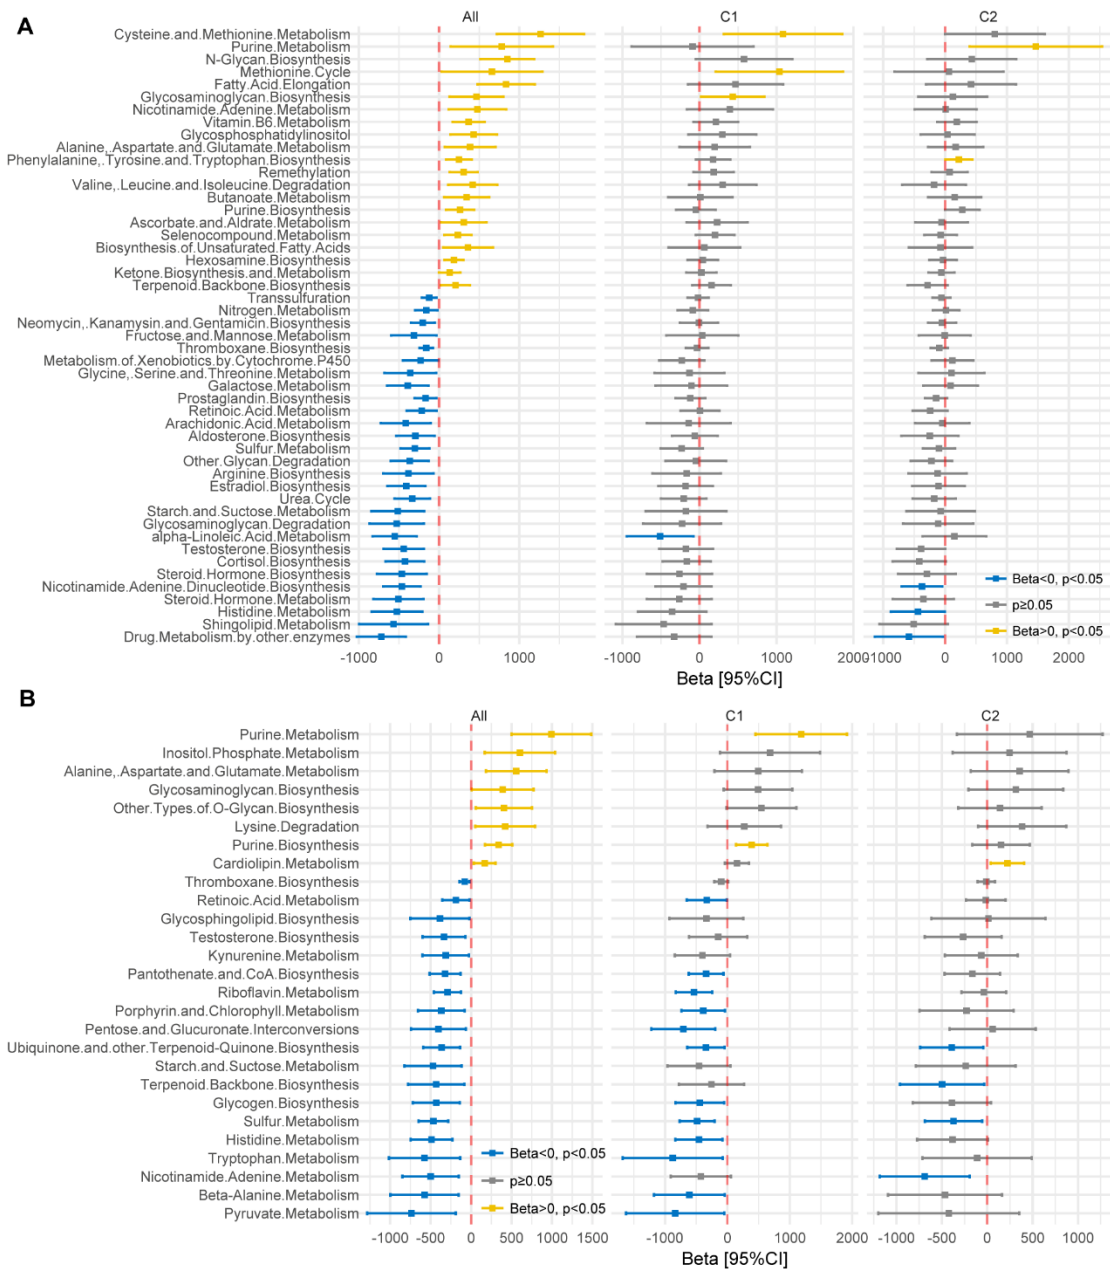

**Supplementary Figure 9.** Forest plot displaying the association between metabolic pathway ssGSEA scores and FEV1 in the (A) ECLIPSE and (B) COPDGene datasets. From left to right, the association with ssGSEA scores in whole dataset, C1 and C2 are shown.

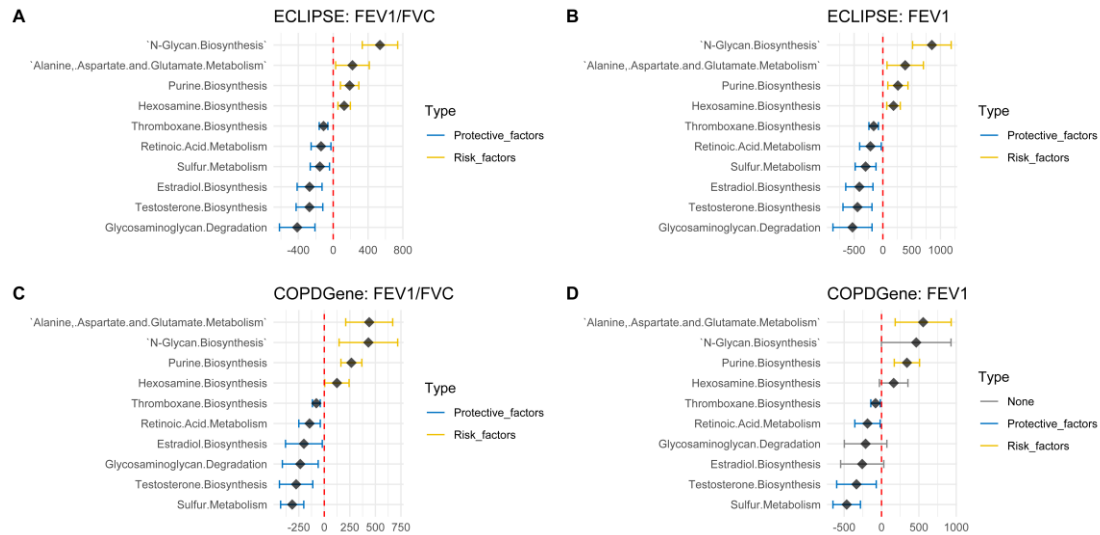

**Supplementary Figure 10.** Association of ten key pathways with FEV1 or FEV1/FVC in two datasets.

**Supplementary Table 8.** Top-10 up-regulated and down-regulated genes (C1 vs C2) sorted by RRA score.

| Gene symbol     | ECLIPSE  |          |            | COPDGene |          |            | RRA Score |
|-----------------|----------|----------|------------|----------|----------|------------|-----------|
|                 | logFC    | P-Value  | Adjusted P | logFC    | P-Value  | Adjusted P |           |
| <b>ENPP5</b>    | -0.82101 | 4.61E-12 | 4.68E-11   | -0.74673 | 7.06E-07 | 1.57E-05   | 1.74E-05  |
| <b>CENPK</b>    | -0.80845 | 4.45E-11 | 3.84E-10   | -0.87919 | 2.55E-08 | 1.17E-06   | 2.34E-05  |
| <b>SLAIN1</b>   | -0.78351 | 4.90E-30 | 3.19E-27   | -0.6023  | 2.92E-10 | 3.62E-08   | 3.79E-05  |
| <b>THEMIS</b>   | -1.16241 | 2.01E-29 | 1.13E-26   | -0.57466 | 5.39E-08 | 2.10E-06   | 6.26E-05  |
| <b>PLEKHG1</b>  | -0.76366 | 2.11E-12 | 2.27E-11   | -0.60829 | 2.13E-06 | 3.78E-05   | 8.12E-05  |
| <b>KLRC4</b>    | -0.69721 | 6.26E-12 | 6.19E-11   | -0.52337 | 0.001512 | 0.006888   | 0.000333  |
| <b>NAP1L2</b>   | -0.72422 | 3.98E-14 | 5.84E-13   | -0.51134 | 1.40E-08 | 7.20E-07   | 0.0004    |
| <b>FAM169A</b>  | -0.69481 | 3.29E-16 | 7.22E-15   | -0.50525 | 5.27E-09 | 3.43E-07   | 0.000445  |
| <b>OSBPL10</b>  | -0.67977 | 5.03E-13 | 6.03E-12   | -0.58567 | 8.98E-06 | 0.000118   | 0.000464  |
| <b>TMEM64</b>   | -0.67856 | 1.13E-18 | 4.00E-17   | -0.51234 | 1.15E-11 | 3.11E-09   | 0.000474  |
| <b>LRG1</b>     | 0.564423 | 1.32E-21 | 8.49E-20   | 0.539592 | 3.39E-05 | 0.000338   | 4.81E-05  |
| <b>IL1R2</b>    | 0.562114 | 1.11E-24 | 1.56E-22   | 0.554873 | 4.39E-05 | 0.000414   | 5.01E-05  |
| <b>CA1</b>      | 0.541289 | 0.000331 | 0.000754   | 0.463952 | 0.011934 | 0.034972   | 8.99E-05  |
| <b>ADAMTSL4</b> | 0.538026 | 1.32E-25 | 2.46E-23   | 0.582234 | 5.14E-08 | 2.03E-06   | 9.81E-05  |
| <b>AHSP</b>     | 0.531073 | 0.000181 | 0.000438   | 0.552153 | 0.004042 | 0.014918   | 0.000119  |
| <b>MCEMP1</b>   | 0.524359 | 8.1E-14  | 1.13E-12   | 0.446085 | 2.86E-06 | 4.75E-05   | 0.000155  |
| <b>HP</b>       | 0.498903 | 1.4E-06  | 5.37E-06   | 0.751921 | 4.16E-05 | 0.000396   | 0.000204  |
| <b>S100P</b>    | 0.497304 | 1.42E-05 | 4.41E-05   | 0.573979 | 0.000146 | 0.001084   | 0.000212  |
| <b>MRVII</b>    | 0.537425 | 7.07E-25 | 1.06E-22   | 0.430851 | 1.4E-07  | 4.47E-06   | 0.000221  |
| <b>RARA-AS1</b> | 0.496019 | 1.4E-23  | 1.51E-21   | 0.490217 | 2.04E-12 | 9.35E-10   | 0.000221  |

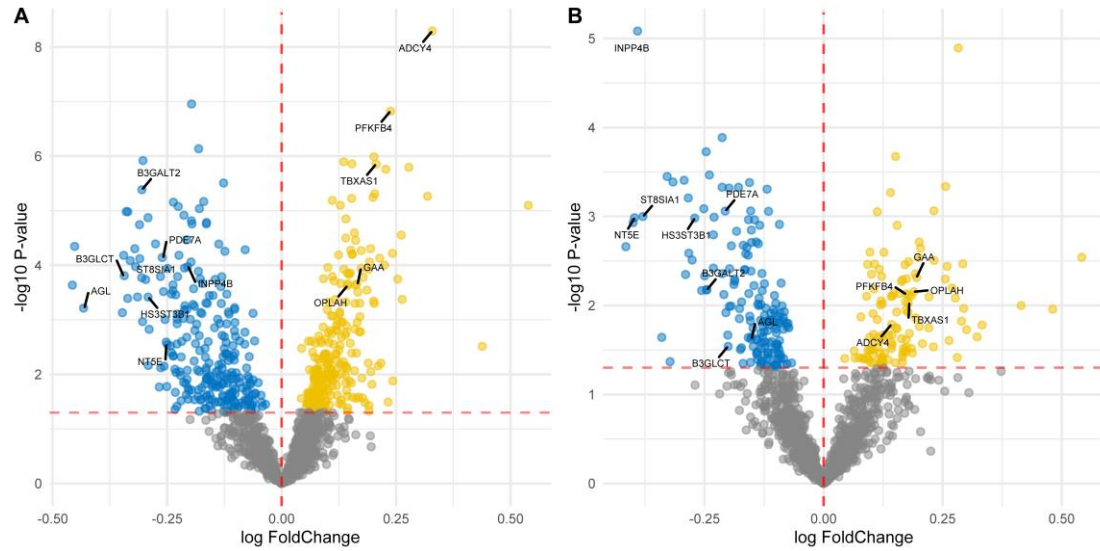

**Supplementary Figure 11.** Volcano plot showing differentially expressed genes (DEGs) related to between COPD patients and healthy smokers in the (A) ECLIPSE and (B) COPDGene datasets. The upregulated and downregulated genes with RRA score<0.05 are labelled in the figure.

**Supplementary Table 9.** Up-regulated and down-regulated genes (COPD patients vs Healthy smokers) sorted by RRA score.

| Genes    | RRA score | FEV1/FVC (ECLIPSE) |          | FEV1/FVC (COPDGene) |          | FEV1 (ECLIPSE) |          | FEV1 (COPDGene) |          |
|----------|-----------|--------------------|----------|---------------------|----------|----------------|----------|-----------------|----------|
|          |           | Beta               | P-value  | Beta                | P-value  | Beta           | P-value  | Beta            | P-value  |
| B3GALT2  | 0.006     | 11.66              | 9.47E-06 | 5.90                | 0.042    | 14.93          | 6.17E-04 | 7.89            | 0.088    |
| ST8SIA1  | 0.006     | 10.17              | 4.20E-06 | 6.33                | 0.005    | 15.56          | 1.93E-05 | 10.32           | 0.004    |
| HS3ST3B1 | 0.007     | 6.58               | 0.002    | 8.60                | 0.006    | 10.39          | 0.004    | 11.24           | 0.026    |
| PDE7A    | 0.013     | 9.21               | 6.28E-04 | 15.74               | 1.44E-04 | 14.51          | 0.001    | 20.46           | 0.002    |
| B3GLCT   | 0.016     | 7.53               | 1.05E-04 | 4.66                | 0.106    | 10.53          | 0.001    | 5.58            | 0.226    |
| NT5E     | 0.018     | 7.61               | 3.52E-04 | 6.50                | 0.002    | 12.18          | 5.00E-04 | 9.34            | 0.006    |
| AGL      | 0.032     | 3.55               | 0.012    | 5.15                | 0.190    | 4.15           | 0.075    | 3.72            | 0.553    |
| INPP4B   | 0.043     | 16.57              | 4.95E-07 | 12.58               | 9.75E-06 | 21.28          | 1.01E-04 | 19.82           | 1.29E-05 |
| ADCY4    | 0.012     | -17.41             | 7.32E-09 | -5.25               | 0.241    | 25.64          | 2.63E-07 | -9.64           | 0.177    |
| PFKFB4   | 0.024     | -21.17             | 2.24E-08 | -13.32              | 9.20E-04 | -30.52         | 1.11E-06 | -17.65          | 0.006    |
| TBXAS1   | 0.025     | -17.18             | 2.62E-05 | -14.25              | 1.68E-04 | -26.33         | 9.08E-05 | -15.68          | 0.011    |
| GAA      | 0.036     | -15.35             | 1.19E-04 | -11.48              | 0.002    | -23.55         | 3.32E-04 | -14.60          | 0.015    |
| OPLAH    | 0.039     | -19.36             | 1.76E-05 | -9.74               | 0.009    | -25.99         | 4.89E-04 | -15.23          | 0.011    |

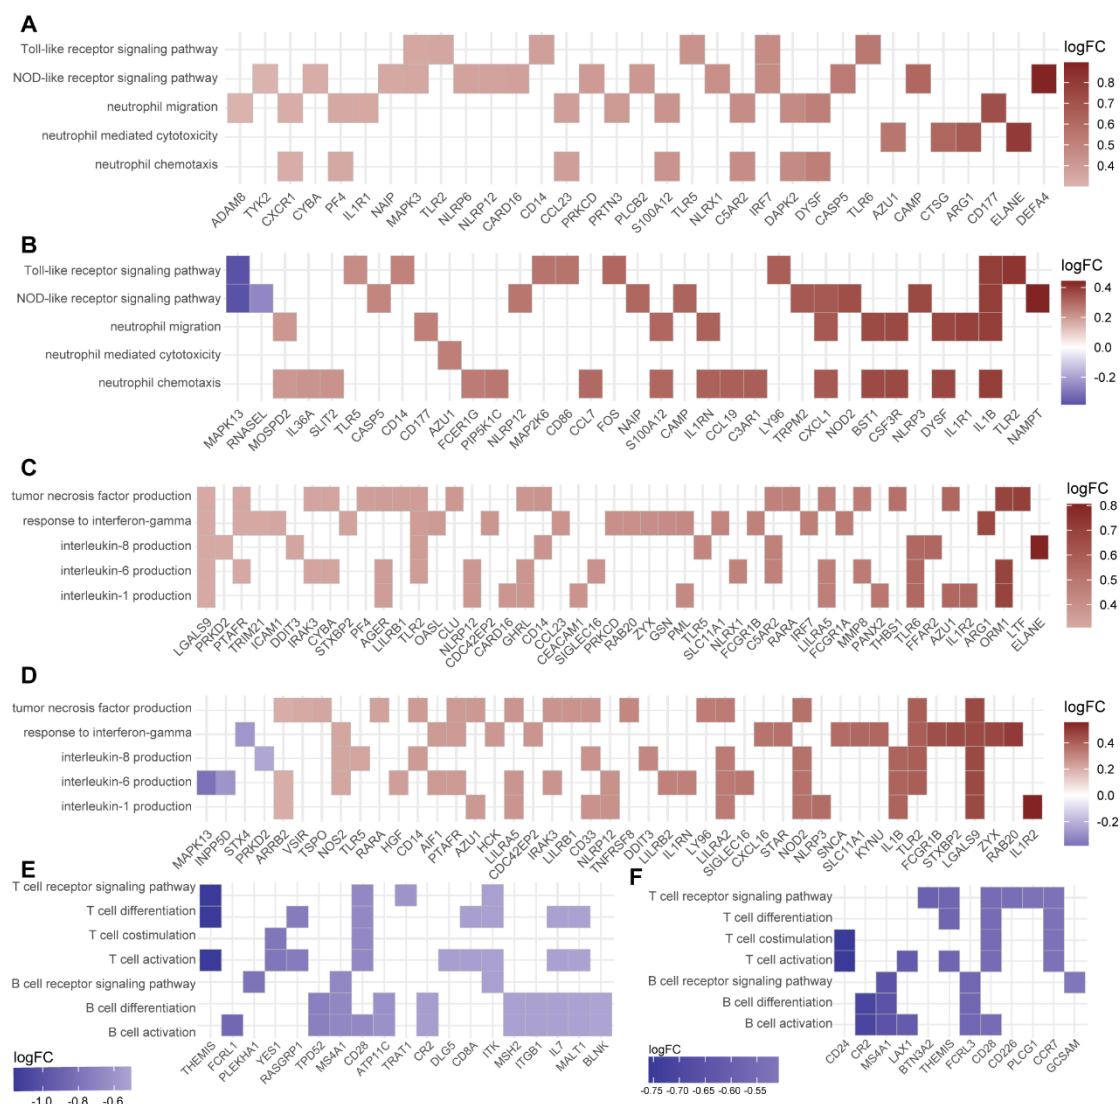

**Supplementary Figure 12.** Gene expression (C1 vs C2) of genes in the immune process-related pathways. Pathogen recognition and neutrophil-related pathways in the (A) ECLIPSE and (B) COPDGen datasets. Cytokine-related pathways in the (C) ECLIPSE and (D) COPDGen datasets. T and B cell-related pathways in the (E) ECLIPSE and (F) COPDGen datasets.

**Supplementary Table 10.** Detailed results of GSEA for GO-BP, KEGG and Reactome in the ECLIPSE dataset.

| Source | ID       | Description                         | setSize | enrichmentScore | NES      | pvalue   | p.adjust | qvalues  |
|--------|----------|-------------------------------------|---------|-----------------|----------|----------|----------|----------|
| KEGG   | hsa05168 | Herpes simplex virus 1 infection    | 445     | -0.52805        | -2.24632 | 0.000102 | 0.00863  | 0.006691 |
| KEGG   | hsa03010 | Ribosome                            | 113     | -0.55032        | -2.1037  | 0.000118 | 0.00863  | 0.006691 |
| KEGG   | hsa03013 | RNA transport                       | 148     | -0.49553        | -1.95052 | 0.000113 | 0.00863  | 0.006691 |
| KEGG   | hsa03008 | Ribosome biogenesis in eukaryotes   | 71      | -0.53893        | -1.9229  | 0.000127 | 0.00863  | 0.006691 |
| KEGG   | hsa03060 | Protein export                      | 23      | -0.64305        | -1.85801 | 0.001045 | 0.016627 | 0.012891 |
| KEGG   | hsa04612 | Antigen processing and presentation | 65      | -0.52764        | -1.85629 | 0.000129 | 0.00863  | 0.006691 |
| KEGG   | hsa04710 | Circadian rhythm                    | 28      | -0.61364        | -1.85163 | 0.000871 | 0.016627 | 0.012891 |



|      |          |                                                            |     |          |          |          |          |          |
|------|----------|------------------------------------------------------------|-----|----------|----------|----------|----------|----------|
| KEGG | hsa03018 | RNA degradation                                            | 76  | -0.50544 | -1.82309 | 0.000251 | 0.011975 | 0.009284 |
| KEGG | hsa00062 | Fatty acid elongation                                      | 23  | -0.61538 | -1.77805 | 0.002838 | 0.030572 | 0.023702 |
| KEGG | hsa00900 | Terpenoid backbone biosynthesis                            | 22  | -0.61553 | -1.76049 | 0.003318 | 0.03358  | 0.026034 |
| KEGG | hsa04660 | T cell receptor signaling pathway                          | 102 | -0.46374 | -1.74774 | 0.000239 | 0.011975 | 0.009284 |
| KEGG | hsa03460 | Fanconi anemia pathway                                     | 48  | -0.51566 | -1.72494 | 0.002148 | 0.027384 | 0.021231 |
| KEGG | hsa00280 | Valine, leucine and isoleucine degradation                 | 48  | -0.51487 | -1.72227 | 0.002282 | 0.027384 | 0.021231 |
| KEGG | hsa00513 | Various types of N-glycan biosynthesis                     | 38  | -0.53187 | -1.69945 | 0.005679 | 0.047884 | 0.037124 |
| KEGG | hsa03022 | Basal transcription factors                                | 40  | -0.52279 | -1.69176 | 0.004675 | 0.041095 | 0.031861 |
| KEGG | hsa05340 | Primary immunodeficiency                                   | 36  | -0.5357  | -1.69104 | 0.006021 | 0.047884 | 0.037124 |
| KEGG | hsa04110 | Cell cycle                                                 | 122 | -0.43727 | -1.68567 | 0.000349 | 0.014571 | 0.011296 |
| KEGG | hsa00510 | N-Glycan biosynthesis                                      | 48  | -0.4984  | -1.6672  | 0.004564 | 0.041095 | 0.031861 |
| KEGG | hsa03040 | Spliceosome                                                | 119 | -0.42381 | -1.62936 | 0.00117  | 0.017763 | 0.013771 |
| KEGG | hsa03420 | Nucleotide excision repair                                 | 43  | -0.49184 | -1.61329 | 0.011958 | 0.073963 | 0.057343 |
| KEGG | hsa04120 | Ubiquitin mediated proteolysis                             | 135 | -0.40936 | -1.59645 | 0.002296 | 0.027384 | 0.021231 |
| KEGG | hsa03015 | mRNA surveillance pathway                                  | 84  | -0.41333 | -1.51536 | 0.011092 | 0.071244 | 0.055235 |
| KEGG | hsa04390 | Hippo signaling pathway                                    | 148 | -0.37352 | -1.47026 | 0.009711 | 0.066193 | 0.051319 |
| KEGG | hsa04218 | Cellular senescence                                        | 154 | -0.37128 | -1.46525 | 0.010034 | 0.067026 | 0.051965 |
| KEGG | hsa04141 | Protein processing in endoplasmic reticulum                | 164 | -0.35757 | -1.42205 | 0.014588 | 0.088589 | 0.068682 |
| KEGG | hsa04015 | Rap1 signaling pathway                                     | 203 | 0.265467 | 1.357058 | 0.010817 | 0.070843 | 0.054924 |
| KEGG | hsa05132 | Salmonella infection                                       | 242 | 0.263382 | 1.375444 | 0.007692 | 0.055853 | 0.043302 |
| KEGG | hsa05120 | Epithelial cell signaling in Helicobacter pylori infection | 70  | 0.329899 | 1.445286 | 0.016211 | 0.096688 | 0.074962 |
| KEGG | hsa04270 | Vascular smooth muscle contraction                         | 126 | 0.299597 | 1.44747  | 0.007931 | 0.056359 | 0.043695 |
| KEGG | hsa05418 | Fluid shear stress and atherosclerosis                     | 132 | 0.300528 | 1.460297 | 0.006011 | 0.047884 | 0.037124 |
| KEGG | hsa04611 | Platelet activation                                        | 119 | 0.315469 | 1.510299 | 0.004124 | 0.039352 | 0.030509 |
| KEGG | hsa00590 | Arachidonic acid metabolism                                | 55  | 0.363314 | 1.516467 | 0.016577 | 0.097135 | 0.075308 |
| KEGG | hsa04620 | Toll-like receptor signaling pathway                       | 95  | 0.331231 | 1.532619 | 0.006395 | 0.048547 | 0.037638 |
| KEGG | hsa00983 | Drug metabolism - other enzymes                            | 61  | 0.359303 | 1.534851 | 0.011658 | 0.073468 | 0.056959 |
| KEGG | hsa05323 | Rheumatoid arthritis                                       | 85  | 0.344743 | 1.555603 | 0.004336 | 0.040229 | 0.031189 |
| KEGG | hsa04640 | Hematopoietic cell lineage                                 | 92  | 0.337899 | 1.557226 | 0.006201 | 0.048163 | 0.037341 |
| KEGG | hsa05140 | Leishmaniasis                                              | 70  | 0.357586 | 1.566582 | 0.006021 | 0.047884 | 0.037124 |
| KEGG | hsa05152 | Tuberculosis                                               | 170 | 0.317274 | 1.589979 | 0.001012 | 0.016627 | 0.012891 |
| KEGG | hsa05133 | Pertussis                                                  | 70  | 0.367275 | 1.60903  | 0.003705 | 0.0364   | 0.028221 |
| KEGG | hsa04666 | Fc gamma R-mediated phagocytosis                           | 91  | 0.356134 | 1.638095 | 0.002793 | 0.030572 | 0.023702 |
| KEGG | hsa05202 | Transcriptional misregulation in cancer                    | 174 | 0.327786 | 1.648079 | 0.001037 | 0.016627 | 0.012891 |
| KEGG | hsa00350 | Tyrosine metabolism                                        | 36  | 0.438645 | 1.655077 | 0.009091 | 0.063258 | 0.049043 |
| KEGG | hsa05034 | Alcoholism                                                 | 149 | 0.34118  | 1.68226  | 0.000871 | 0.016627 | 0.012891 |
| KEGG | hsa04142 | Lysosome                                                   | 123 | 0.350697 | 1.687109 | 0.001413 | 0.020525 | 0.015913 |
| KEGG | hsa05221 | Acute myeloid leukemia                                     | 66  | 0.389693 | 1.688856 | 0.003138 | 0.032749 | 0.02539  |
| KEGG | hsa04080 | Neuroactive ligand-receptor interaction                    | 327 | 0.315751 | 1.719838 | 0.002653 | 0.03055  | 0.023685 |
| KEGG | hsa00592 | alpha-Linolenic acid metabolism                            | 20  | 0.542671 | 1.733851 | 0.007278 | 0.054019 | 0.041881 |
| KEGG | hsa04621 | NOD-like receptor signaling pathway                        | 167 | 0.348463 | 1.74282  | 0.00098  | 0.016627 | 0.012891 |

|       |            |                                                                |     |          |          |          |          |          |
|-------|------------|----------------------------------------------------------------|-----|----------|----------|----------|----------|----------|
| KEGG  | hsa04610   | Complement and coagulation cascades                            | 81  | 0.394437 | 1.77713  | 0.001026 | 0.016627 | 0.012891 |
| KEGG  | hsa05033   | Nicotine addiction                                             | 38  | 0.478661 | 1.822385 | 0.001797 | 0.024796 | 0.019224 |
| KEGG  | hsa05219   | Bladder cancer                                                 | 41  | 0.48495  | 1.881077 | 0.001856 | 0.024796 | 0.019224 |
| KEGG  | hsa04721   | Synaptic vesicle cycle                                         | 77  | 0.431822 | 1.921829 | 0.000503 | 0.015258 | 0.011829 |
| KEGG  | hsa04145   | Phagosome                                                      | 138 | 0.403478 | 1.976493 | 0.000782 | 0.016627 | 0.012891 |
| KEGG  | hsa05150   | Staphylococcus aureus infection                                | 75  | 0.446743 | 1.983105 | 0.000484 | 0.015258 | 0.011829 |
| KEGG  | hsa04380   | Osteoclast differentiation                                     | 125 | 0.438514 | 2.115038 | 0.000713 | 0.016627 | 0.012891 |
| KEGG  | hsa05144   | Malaria                                                        | 46  | 0.540767 | 2.156147 | 0.000393 | 0.014571 | 0.011296 |
| KEGG  | hsa05322   | Systemic lupus erythematosus                                   | 93  | 0.496957 | 2.292681 | 0.000567 | 0.015787 | 0.01224  |
| GO-BP | GO:0006399 | tRNA metabolic process                                         | 182 | -0.56416 | -2.2704  | 0.000111 | 0.015459 | 0.013196 |
| GO-BP | GO:0006400 | tRNA modification                                              | 82  | -0.61455 | -2.25193 | 0.000124 | 0.015459 | 0.013196 |
| GO-BP | GO:0008033 | tRNA processing                                                | 123 | -0.58208 | -2.25186 | 0.000117 | 0.015459 | 0.013196 |
| GO-BP | GO:0042254 | ribosome biogenesis                                            | 274 | -0.53627 | -2.22673 | 0.000106 | 0.015459 | 0.013196 |
| GO-BP | GO:0022613 | ribonucleoprotein complex biogenesis                           | 433 | -0.51866 | -2.20878 | 0.000102 | 0.015459 | 0.013196 |
| GO-BP | GO:0006614 | SRP-dependent cotranslational protein targeting to membrane    | 80  | -0.60372 | -2.20248 | 0.000125 | 0.015459 | 0.013196 |
| GO-BP | GO:0006613 | cotranslational protein targeting to membrane                  | 84  | -0.59824 | -2.19553 | 0.000124 | 0.015459 | 0.013196 |
| GO-BP | GO:0034470 | ncRNA processing                                               | 348 | -0.51784 | -2.18148 | 0.000104 | 0.015459 | 0.013196 |
| GO-BP | GO:0001510 | RNA methylation                                                | 77  | -0.59917 | -2.1711  | 0.000126 | 0.015459 | 0.013196 |
| GO-BP | GO:0006413 | translational initiation                                       | 167 | -0.5357  | -2.13583 | 0.000112 | 0.015459 | 0.013196 |
| GO-BP | GO:0006364 | rRNA processing                                                | 197 | -0.52225 | -2.11506 | 0.00011  | 0.015459 | 0.013196 |
| GO-BP | GO:0072599 | establishment of protein localization to endoplasmic reticulum | 96  | -0.56303 | -2.10993 | 0.000122 | 0.015459 | 0.013196 |
| GO-BP | GO:0045047 | protein targeting to ER                                        | 92  | -0.56352 | -2.09901 | 0.000122 | 0.015459 | 0.013196 |
| GO-BP | GO:0030488 | tRNA methylation                                               | 38  | -0.64771 | -2.09603 | 0.000139 | 0.016525 | 0.014105 |
| GO-BP | GO:0006405 | RNA export from nucleus                                        | 123 | -0.54089 | -2.09251 | 0.000117 | 0.015459 | 0.013196 |
| GO-BP | GO:0009451 | RNA modification                                               | 153 | -0.52768 | -2.08963 | 0.000113 | 0.015459 | 0.013196 |
| GO-BP | GO:0000959 | mitochondrial RNA metabolic process                            | 42  | -0.62997 | -2.07036 | 0.000139 | 0.016525 | 0.014105 |
| GO-BP | GO:0097064 | ncRNA export from nucleus                                      | 37  | -0.64117 | -2.06188 | 0.00014  | 0.016525 | 0.014105 |
| GO-BP | GO:0016072 | rRNA metabolic process                                         | 234 | -0.49718 | -2.04417 | 0.000107 | 0.015459 | 0.013196 |
| GO-BP | GO:0045292 | mRNA cis splicing, via spliceosome                             | 28  | -0.67203 | -2.04072 | 0.000147 | 0.017027 | 0.014533 |
| GO-BP | GO:0071426 | ribonucleoprotein complex export from nucleus                  | 115 | -0.53134 | -2.03721 | 0.000119 | 0.015459 | 0.013196 |
| GO-BP | GO:0071166 | ribonucleoprotein complex localization                         | 116 | -0.53036 | -2.0362  | 0.000118 | 0.015459 | 0.013196 |
| GO-BP | GO:0051236 | establishment of RNA localization                              | 179 | -0.5047  | -2.02616 | 0.000111 | 0.015459 | 0.013196 |
| GO-BP | GO:0140053 | mitochondrial gene expression                                  | 159 | -0.5098  | -2.0243  | 0.000112 | 0.015459 | 0.013196 |
| GO-BP | GO:0090070 | positive regulation of ribosome biogenesis                     | 9   | -0.88335 | -2.02297 | 0.000173 | 0.019516 | 0.016659 |
| GO-BP | GO:2000234 | positive regulation of rRNA processing                         | 9   | -0.88335 | -2.02297 | 0.000173 | 0.019516 | 0.016659 |
| GO-BP | GO:0042273 | ribosomal large subunit biogenesis                             | 63  | -0.57168 | -2.01833 | 0.000259 | 0.02337  | 0.019948 |
| GO-BP | GO:0022618 | ribonucleoprotein complex assembly                             | 220 | -0.49242 | -2.01534 | 0.000108 | 0.015459 | 0.013196 |
| GO-BP | GO:0006403 | RNA localization                                               | 211 | -0.49154 | -2.00422 | 0.000109 | 0.015459 | 0.013196 |
| GO-BP | GO:0090069 | regulation of ribosome biogenesis                              | 14  | -0.7734  | -1.99722 | 0.000815 | 0.029038 | 0.024786 |

|       |            |                                                                                          |     |          |          |          |          |          |
|-------|------------|------------------------------------------------------------------------------------------|-----|----------|----------|----------|----------|----------|
| GO-BP | GO:0050657 | nucleic acid transport                                                                   | 176 | -0.49576 | -1.98783 | 0.000111 | 0.015459 | 0.013196 |
| GO-BP | GO:0050658 | RNA transport                                                                            | 176 | -0.49576 | -1.98783 | 0.000111 | 0.015459 | 0.013196 |
| GO-BP | GO:0000381 | regulation of alternative mRNA splicing, via spliceosome                                 | 58  | -0.57061 | -1.98748 | 0.000263 | 0.02337  | 0.019948 |
| GO-BP | GO:0002181 | cytoplasmic translation                                                                  | 89  | -0.53351 | -1.97987 | 0.000123 | 0.015459 | 0.013196 |
| GO-BP | GO:0051031 | tRNA transport                                                                           | 34  | -0.62601 | -1.97914 | 0.000286 | 0.024493 | 0.020906 |
| GO-BP | GO:0000380 | alternative mRNA splicing, via spliceosome                                               | 67  | -0.55596 | -1.97674 | 0.000258 | 0.02337  | 0.019948 |
| GO-BP | GO:0000463 | maturation of LSU-rRNA from tricistronic rRNA transcript (SSU-rRNA, 5.8S rRNA, LSU-rRNA) | 13  | -0.77646 | -1.96459 | 0.000821 | 0.029038 | 0.024786 |
| GO-BP | GO:2000232 | regulation of rRNA processing                                                            | 12  | -0.79149 | -1.959   | 0.000498 | 0.025683 | 0.021922 |
| GO-BP | GO:0071826 | ribonucleoprotein complex subunit organization                                           | 234 | -0.47585 | -1.95646 | 0.000107 | 0.015459 | 0.013196 |
| GO-BP | GO:0006409 | tRNA export from nucleus                                                                 | 33  | -0.62139 | -1.95448 | 0.000287 | 0.024493 | 0.020906 |
| GO-BP | GO:0071431 | tRNA-containing ribonucleoprotein complex export from nucleus                            | 33  | -0.62139 | -1.95448 | 0.000287 | 0.024493 | 0.020906 |
| GO-BP | GO:0071428 | rRNA-containing ribonucleoprotein complex export from nucleus                            | 14  | -0.7559  | -1.95204 | 0.000815 | 0.029038 | 0.024786 |
| GO-BP | GO:0015931 | nucleobase-containing compound transport                                                 | 221 | -0.47585 | -1.94788 | 0.000108 | 0.015459 | 0.013196 |
| GO-BP | GO:0006607 | NLS-bearing protein import into nucleus                                                  | 12  | -0.78454 | -1.9418  | 0.000831 | 0.029038 | 0.024786 |
| GO-BP | GO:0000054 | ribosomal subunit export from nucleus                                                    | 13  | -0.75816 | -1.91827 | 0.001313 | 0.037238 | 0.031785 |
| GO-BP | GO:0033750 | ribosome localization                                                                    | 13  | -0.75816 | -1.91827 | 0.001313 | 0.037238 | 0.031785 |
| GO-BP | GO:0007062 | sister chromatid cohesion                                                                | 57  | -0.55072 | -1.91339 | 0.000264 | 0.02337  | 0.019948 |
| GO-BP | GO:0034502 | protein localization to chromosome                                                       | 78  | -0.52676 | -1.91215 | 0.000252 | 0.02337  | 0.019948 |
| GO-BP | GO:0006448 | regulation of translational elongation                                                   | 17  | -0.70537 | -1.90637 | 0.000787 | 0.029036 | 0.024784 |
| GO-BP | GO:0071578 | zinc ion import across plasma membrane                                                   | 8   | -0.85296 | -1.89846 | 0.000868 | 0.029977 | 0.025588 |
| GO-BP | GO:0000460 | maturation of 5.8S rRNA                                                                  | 26  | -0.63204 | -1.88935 | 0.000888 | 0.030429 | 0.025973 |
| GO-BP | GO:0051028 | mRNA transport                                                                           | 136 | -0.4822  | -1.88536 | 0.000115 | 0.015459 | 0.013196 |
| GO-BP | GO:0000956 | nuclear-transcribed mRNA catabolic process                                               | 183 | -0.46746 | -1.88259 | 0.000111 | 0.015459 | 0.013196 |
| GO-BP | GO:0000469 | cleavage involved in rRNA processing                                                     | 21  | -0.66237 | -1.8811  | 0.000919 | 0.031017 | 0.026475 |
| GO-BP | GO:0000470 | maturation of LSU-rRNA                                                                   | 19  | -0.67424 | -1.88065 | 0.001696 | 0.041246 | 0.035207 |
| GO-BP | GO:0046112 | nucleobase biosynthetic process                                                          | 19  | -0.66956 | -1.8676  | 0.001696 | 0.041246 | 0.035207 |
| GO-BP | GO:0016556 | mRNA modification                                                                        | 20  | -0.66138 | -1.86413 | 0.001535 | 0.040114 | 0.03424  |
| GO-BP | GO:0070911 | global genome nucleotide-excision repair                                                 | 25  | -0.62852 | -1.86327 | 0.001186 | 0.034882 | 0.029774 |
| GO-BP | GO:0045005 | DNA-dependent DNA replication maintenance of fidelity                                    | 39  | -0.57192 | -1.85892 | 0.001114 | 0.03376  | 0.028817 |
| GO-BP | GO:0032543 | mitochondrial translation                                                                | 132 | -0.47702 | -1.85859 | 0.000116 | 0.015459 | 0.013196 |
| GO-BP | GO:0043414 | macromolecule methylation                                                                | 294 | -0.44515 | -1.85711 | 0.000105 | 0.015459 | 0.013196 |

|       |            |                                                                                           |     |          |          |          |          |          |
|-------|------------|-------------------------------------------------------------------------------------------|-----|----------|----------|----------|----------|----------|
| GO-BP | GO:1900034 | regulation of cellular response to heat                                                   | 75  | -0.5137  | -1.8563  | 0.000633 | 0.027137 | 0.023164 |
| GO-BP | GO:0006406 | mRNA export from nucleus                                                                  | 99  | -0.49188 | -1.84877 | 0.000121 | 0.015459 | 0.013196 |
| GO-BP | GO:0071427 | mRNA-containing ribonucleoprotein complex export from nucleus                             | 99  | -0.49188 | -1.84877 | 0.000121 | 0.015459 | 0.013196 |
| GO-BP | GO:0000466 | maturation of 5.8S rRNA from tricistronic rRNA transcript (SSU-rRNA, 5.8S rRNA, LSU-rRNA) | 21  | -0.65096 | -1.84868 | 0.001379 | 0.038228 | 0.032631 |
| GO-BP | GO:0035459 | cargo loading into vesicle                                                                | 20  | -0.65547 | -1.84748 | 0.001535 | 0.040114 | 0.03424  |
| GO-BP | GO:0000725 | recombinational repair                                                                    | 128 | -0.47509 | -1.84498 | 0.000117 | 0.015459 | 0.013196 |
| GO-BP | GO:0015693 | magnesium ion transport                                                                   | 16  | -0.69047 | -1.84301 | 0.001431 | 0.038842 | 0.033154 |
| GO-BP | GO:1901844 | regulation of cell communication by electrical coupling involved in cardiac conduction    | 8   | -0.82717 | -1.84105 | 0.001389 | 0.038371 | 0.032752 |
| GO-BP | GO:0071459 | protein localization to chromosome, centromeric region                                    | 21  | -0.64777 | -1.83964 | 0.001686 | 0.041246 | 0.035207 |
| GO-BP | GO:0070972 | protein localization to endoplasmic reticulum                                             | 120 | -0.47715 | -1.83798 | 0.000236 | 0.02337  | 0.019948 |
| GO-BP | GO:0048291 | isotype switching to IgG isotypes                                                         | 13  | -0.72521 | -1.83491 | 0.002134 | 0.047073 | 0.04018  |
| GO-BP | GO:0019080 | viral gene expression                                                                     | 170 | -0.45947 | -1.83425 | 0.000112 | 0.015459 | 0.013196 |
| GO-BP | GO:1901796 | regulation of signal transduction by p53 class mediator                                   | 173 | -0.45821 | -1.83285 | 0.000112 | 0.015459 | 0.013196 |
| GO-BP | GO:1903830 | magnesium ion transmembrane transport                                                     | 15  | -0.69596 | -1.83088 | 0.002083 | 0.046571 | 0.039751 |
| GO-BP | GO:0031123 | RNA 3'-end processing                                                                     | 128 | -0.47087 | -1.82858 | 0.000117 | 0.015459 | 0.013196 |
| GO-BP | GO:0042255 | ribosome assembly                                                                         | 52  | -0.53451 | -1.82658 | 0.001072 | 0.033277 | 0.028404 |
| GO-BP | GO:0000724 | double-strand break repair via homologous recombination                                   | 127 | -0.46988 | -1.82296 | 0.000117 | 0.015459 | 0.013196 |
| GO-BP | GO:0000963 | mitochondrial RNA processing                                                              | 17  | -0.67446 | -1.82282 | 0.002362 | 0.048898 | 0.041738 |
| GO-BP | GO:0019083 | viral transcription                                                                       | 156 | -0.45895 | -1.82031 | 0.000113 | 0.015459 | 0.013196 |
| GO-BP | GO:0032259 | methylation                                                                               | 346 | -0.43051 | -1.81343 | 0.000104 | 0.015459 | 0.013196 |
| GO-BP | GO:0042274 | ribosomal small subunit biogenesis                                                        | 63  | -0.51304 | -1.81127 | 0.000777 | 0.028779 | 0.024565 |
| GO-BP | GO:0035871 | protein K11-linked deubiquitination                                                       | 9   | -0.79035 | -1.81    | 0.002417 | 0.049218 | 0.042011 |
| GO-BP | GO:0007063 | regulation of sister chromatid cohesion                                                   | 22  | -0.62969 | -1.80904 | 0.002288 | 0.04809  | 0.041048 |
| GO-BP | GO:0031365 | N-terminal protein amino acid modification                                                | 27  | -0.60059 | -1.80859 | 0.002365 | 0.048898 | 0.041738 |
| GO-BP | GO:0000729 | DNA double-strand break processing                                                        | 23  | -0.62311 | -1.80803 | 0.00242  | 0.049218 | 0.042011 |
| GO-BP | GO:0006417 | regulation of translation                                                                 | 318 | -0.43072 | -1.80613 | 0.000105 | 0.015459 | 0.013196 |
| GO-BP | GO:0036297 | interstrand cross-link repair                                                             | 49  | -0.53417 | -1.80314 | 0.000948 | 0.031207 | 0.026637 |
| GO-BP | GO:0061157 | mRNA destabilization                                                                      | 28  | -0.59264 | -1.79966 | 0.002201 | 0.047407 | 0.040465 |
| GO-BP | GO:0033683 | nucleotide-excision repair, DNA incision                                                  | 38  | -0.55605 | -1.79942 | 0.001953 | 0.044849 | 0.038281 |
| GO-BP | GO:0090503 | RNA phosphodiester bond hydrolysis, exonucleolytic                                        | 41  | -0.54827 | -1.79615 | 0.001803 | 0.042887 | 0.036607 |
| GO-BP | GO:0031023 | microtubule organizing center                                                             | 128 | -0.46226 | -1.79517 | 0.000233 | 0.02337  | 0.019948 |

|       |            |                                                                                              |     |          |          |          |          |          |
|-------|------------|----------------------------------------------------------------------------------------------|-----|----------|----------|----------|----------|----------|
|       |            | organization                                                                                 |     |          |          |          |          |          |
| GO-BP | GO:0007064 | mitotic sister chromatid cohesion                                                            | 23  | -0.61863 | -1.79502 | 0.00242  | 0.049218 | 0.042011 |
| GO-BP | GO:0006289 | nucleotide-excision repair                                                                   | 105 | -0.47127 | -1.78928 | 0.00012  | 0.015459 | 0.013196 |
| GO-BP | GO:0031297 | replication fork processing                                                                  | 30  | -0.58136 | -1.78785 | 0.002331 | 0.04843  | 0.041338 |
| GO-BP | GO:0043484 | regulation of RNA splicing                                                                   | 120 | -0.46361 | -1.78582 | 0.000236 | 0.02337  | 0.019948 |
| GO-BP | GO:0017148 | negative regulation of translation                                                           | 123 | -0.46149 | -1.78534 | 0.000351 | 0.02533  | 0.021621 |
| GO-BP | GO:0061014 | positive regulation of mRNA catabolic process                                                | 46  | -0.53476 | -1.78521 | 0.001367 | 0.03801  | 0.032444 |
| GO-BP | GO:0061087 | positive regulation of histone H3-K27 methylation                                            | 6   | -0.87013 | -1.78251 | 0.001086 | 0.033277 | 0.028404 |
| GO-BP | GO:0002562 | somatic diversification of immune receptors via germline recombination within a single locus | 61  | -0.50525 | -1.77458 | 0.001433 | 0.038842 | 0.033154 |
| GO-BP | GO:0016444 | somatic cell DNA recombination                                                               | 61  | -0.50525 | -1.77458 | 0.001433 | 0.038842 | 0.033154 |
| GO-BP | GO:0006446 | regulation of translational initiation                                                       | 73  | -0.4929  | -1.77455 | 0.000763 | 0.028621 | 0.02443  |
| GO-BP | GO:0032392 | DNA geometric change                                                                         | 115 | -0.45941 | -1.76143 | 0.000356 | 0.02533  | 0.021621 |
| GO-BP | GO:1905515 | non-motile cilium assembly                                                                   | 54  | -0.51152 | -1.76056 | 0.001864 | 0.043724 | 0.037321 |
| GO-BP | GO:0051168 | nuclear export                                                                               | 181 | -0.43788 | -1.76053 | 0.000111 | 0.015459 | 0.013196 |
| GO-BP | GO:0008380 | RNA splicing                                                                                 | 396 | -0.41481 | -1.75986 | 0.000103 | 0.015459 | 0.013196 |
| GO-BP | GO:0000375 | RNA splicing, via transesterification reactions                                              | 317 | -0.41971 | -1.75905 | 0.000105 | 0.015459 | 0.013196 |
| GO-BP | GO:0000377 | RNA splicing, via transesterification reactions with bulged adenosine as nucleophile         | 314 | -0.41927 | -1.75643 | 0.000105 | 0.015459 | 0.013196 |
| GO-BP | GO:0000398 | mRNA splicing, via spliceosome                                                               | 314 | -0.41927 | -1.75643 | 0.000105 | 0.015459 | 0.013196 |
| GO-BP | GO:0048024 | regulation of mRNA splicing, via spliceosome                                                 | 88  | -0.47396 | -1.75636 | 0.000614 | 0.026873 | 0.022938 |
| GO-BP | GO:0006415 | translational termination                                                                    | 101 | -0.46521 | -1.75433 | 0.000241 | 0.02337  | 0.019948 |
| GO-BP | GO:0051298 | centrosome duplication                                                                       | 64  | -0.49466 | -1.75082 | 0.001552 | 0.040225 | 0.034335 |
| GO-BP | GO:0006397 | mRNA processing                                                                              | 463 | -0.40937 | -1.74861 | 0.000102 | 0.015459 | 0.013196 |
| GO-BP | GO:0016925 | protein sumoylation                                                                          | 77  | -0.4823  | -1.74762 | 0.000757 | 0.028509 | 0.024335 |
| GO-BP | GO:0007098 | centrosome cycle                                                                             | 120 | -0.45341 | -1.74651 | 0.000354 | 0.02533  | 0.021621 |
| GO-BP | GO:0032508 | DNA duplex unwinding                                                                         | 106 | -0.45925 | -1.74555 | 0.000358 | 0.02533  | 0.021621 |
| GO-BP | GO:0031503 | protein-containing complex localization                                                      | 264 | -0.41839 | -1.7333  | 0.000106 | 0.015459 | 0.013196 |
| GO-BP | GO:0006402 | mRNA catabolic process                                                                       | 328 | -0.41142 | -1.72782 | 0.000104 | 0.015459 | 0.013196 |
| GO-BP | GO:0006261 | DNA-dependent DNA replication                                                                | 149 | -0.43788 | -1.72778 | 0.000228 | 0.02337  | 0.019948 |
| GO-BP | GO:2001020 | regulation of response to DNA damage stimulus                                                | 203 | -0.42369 | -1.72184 | 0.000109 | 0.015459 | 0.013196 |
| GO-BP | GO:0006414 | translational elongation                                                                     | 124 | -0.44369 | -1.71869 | 0.000583 | 0.026355 | 0.022496 |
| GO-BP | GO:0000819 | sister chromatid segregation                                                                 | 180 | -0.42558 | -1.71052 | 0.000111 | 0.015459 | 0.013196 |
| GO-BP | GO:0050684 | regulation of mRNA processing                                                                | 124 | -0.44115 | -1.70882 | 0.0007   | 0.027687 | 0.023633 |
| GO-BP | GO:0006611 | protein export from nucleus                                                                  | 166 | -0.42665 | -1.70133 | 0.000112 | 0.015459 | 0.013196 |
| GO-BP | GO:0006310 | DNA recombination                                                                            | 276 | -0.4095  | -1.7003  | 0.000106 | 0.015459 | 0.013196 |

|       |            |                                                                           |     |          |          |          |          |          |
|-------|------------|---------------------------------------------------------------------------|-----|----------|----------|----------|----------|----------|
| GO-BP | GO:0000288 | nuclear-transcribed mRNA catabolic process, deadenylation-dependent decay | 74  | -0.47051 | -1.69594 | 0.001651 | 0.04119  | 0.035159 |
| GO-BP | GO:0006892 | post-Golgi vesicle-mediated transport                                     | 102 | -0.44846 | -1.69479 | 0.001442 | 0.038842 | 0.033154 |
| GO-BP | GO:0031124 | mRNA 3'-end processing                                                    | 88  | -0.45633 | -1.69102 | 0.00172  | 0.041594 | 0.035503 |
| GO-BP | GO:0002200 | somatic diversification of immune receptors                               | 71  | -0.47162 | -1.68997 | 0.001915 | 0.04433  | 0.037839 |
| GO-BP | GO:0034248 | regulation of cellular amide metabolic process                            | 374 | -0.39928 | -1.68873 | 0.000103 | 0.015459 | 0.013196 |
| GO-BP | GO:0007030 | Golgi organization                                                        | 117 | -0.43771 | -1.68241 | 0.000944 | 0.031207 | 0.026637 |
| GO-BP | GO:0006479 | protein methylation                                                       | 173 | -0.41991 | -1.67966 | 0.000112 | 0.015459 | 0.013196 |
| GO-BP | GO:0008213 | protein alkylation                                                        | 173 | -0.41991 | -1.67966 | 0.000112 | 0.015459 | 0.013196 |
| GO-BP | GO:0000184 | nuclear-transcribed mRNA catabolic process, nonsense-mediated decay       | 100 | -0.44461 | -1.67469 | 0.001689 | 0.041246 | 0.035207 |
| GO-BP | GO:0051225 | spindle assembly                                                          | 99  | -0.44534 | -1.67384 | 0.001936 | 0.044576 | 0.038049 |
| GO-BP | GO:0098781 | ncRNA transcription                                                       | 104 | -0.44126 | -1.67202 | 0.00192  | 0.04433  | 0.037839 |
| GO-BP | GO:0034605 | cellular response to heat                                                 | 124 | -0.42941 | -1.66338 | 0.000933 | 0.031135 | 0.026576 |
| GO-BP | GO:0070126 | mitochondrial translational termination                                   | 87  | -0.44897 | -1.66209 | 0.002211 | 0.047407 | 0.040465 |
| GO-BP | GO:0070125 | mitochondrial translational elongation                                    | 86  | -0.45013 | -1.66183 | 0.002223 | 0.047539 | 0.040578 |
| GO-BP | GO:0006401 | RNA catabolic process                                                     | 360 | -0.39208 | -1.65582 | 0.000104 | 0.015459 | 0.013196 |
| GO-BP | GO:0045727 | positive regulation of translation                                        | 112 | -0.43291 | -1.65472 | 0.00167  | 0.041246 | 0.035207 |
| GO-BP | GO:0006302 | double-strand break repair                                                | 229 | -0.40271 | -1.65293 | 0.000108 | 0.015459 | 0.013196 |
| GO-BP | GO:0098813 | nuclear chromosome segregation                                            | 250 | -0.3994  | -1.6503  | 0.000106 | 0.015459 | 0.013196 |
| GO-BP | GO:0034249 | negative regulation of cellular amide metabolic process                   | 142 | -0.41943 | -1.64746 | 0.00103  | 0.032569 | 0.0278   |
| GO-BP | GO:0006260 | DNA replication                                                           | 266 | -0.39649 | -1.64378 | 0.000106 | 0.015459 | 0.013196 |
| GO-BP | GO:0051169 | nuclear transport                                                         | 321 | -0.38934 | -1.63246 | 0.000105 | 0.015459 | 0.013196 |
| GO-BP | GO:0072331 | signal transduction by p53 class mediator                                 | 255 | -0.39207 | -1.62137 | 0.000106 | 0.015459 | 0.013196 |
| GO-BP | GO:0006913 | nucleocytoplasmic transport                                               | 318 | -0.38541 | -1.61613 | 0.000105 | 0.015459 | 0.013196 |
| GO-BP | GO:1903311 | regulation of mRNA metabolic process                                      | 301 | -0.38578 | -1.61157 | 0.000105 | 0.015459 | 0.013196 |
| GO-BP | GO:0090305 | nucleic acid phosphodiester bond hydrolysis                               | 276 | -0.38697 | -1.60673 | 0.000106 | 0.015459 | 0.013196 |
| GO-BP | GO:0009411 | response to UV                                                            | 136 | -0.40999 | -1.60303 | 0.002077 | 0.046571 | 0.039751 |
| GO-BP | GO:0000070 | mitotic sister chromatid segregation                                      | 148 | -0.40467 | -1.59542 | 0.001821 | 0.043072 | 0.036765 |
| GO-BP | GO:0070646 | protein modification by small protein removal                             | 266 | -0.38444 | -1.59382 | 0.000106 | 0.015459 | 0.013196 |
| GO-BP | GO:0043543 | protein acylation                                                         | 234 | -0.38739 | -1.59277 | 0.000215 | 0.02337  | 0.019948 |
| GO-BP | GO:0050851 | antigen receptor-mediated signaling pathway                               | 237 | -0.38534 | -1.58477 | 0.000322 | 0.02533  | 0.021621 |
| GO-BP | GO:0016573 | histone acetylation                                                       | 149 | -0.40091 | -1.58187 | 0.002048 | 0.046291 | 0.039512 |
| GO-BP | GO:0007051 | spindle organization                                                      | 159 | -0.39291 | -1.56016 | 0.001912 | 0.04433  | 0.037839 |
| GO-BP | GO:0018205 | peptidyl-lysine modification                                              | 379 | -0.3674  | -1.5554  | 0.000103 | 0.015459 | 0.013196 |
| GO-BP | GO:0007059 | chromosome segregation                                                    | 307 | -0.37127 | -1.55179 | 0.000105 | 0.015459 | 0.013196 |

|       |            |                                                                                  |     |          |          |          |          |          |
|-------|------------|----------------------------------------------------------------------------------|-----|----------|----------|----------|----------|----------|
| GO-BP | GO:0042113 | B cell activation                                                                | 241 | -0.37283 | -1.53603 | 0.00075  | 0.028393 | 0.024235 |
| GO-BP | GO:0006457 | protein folding                                                                  | 201 | -0.37787 | -1.53422 | 0.001643 | 0.04119  | 0.035159 |
| GO-BP | GO:0006473 | protein acetylation                                                              | 193 | -0.37906 | -1.53396 | 0.002087 | 0.046571 | 0.039751 |
| GO-BP | GO:0048193 | Golgi vesicle transport                                                          | 346 | -0.36414 | -1.53388 | 0.000312 | 0.02533  | 0.021621 |
| GO-BP | GO:0090150 | establishment of protein localization to membrane                                | 297 | -0.36689 | -1.53149 | 0.000105 | 0.015459 | 0.013196 |
| GO-BP | GO:0044843 | cell cycle G1/S phase transition                                                 | 253 | -0.36811 | -1.52124 | 0.000533 | 0.02597  | 0.022167 |
| GO-BP | GO:0000082 | G1/S transition of mitotic cell cycle                                            | 237 | -0.36944 | -1.51939 | 0.000966 | 0.031557 | 0.026936 |
| GO-BP | GO:0060271 | cilium assembly                                                                  | 353 | -0.3583  | -1.51079 | 0.000415 | 0.025369 | 0.021654 |
| GO-BP | GO:0030217 | T cell differentiation                                                           | 232 | -0.36579 | -1.50263 | 0.001613 | 0.041075 | 0.035061 |
| GO-BP | GO:0006605 | protein targeting                                                                | 392 | -0.35319 | -1.49774 | 0.000206 | 0.02297  | 0.019607 |
| GO-BP | GO:0072594 | establishment of protein localization to organelle                               | 500 | -0.34956 | -1.49653 | 0.000101 | 0.015459 | 0.013196 |
| GO-BP | GO:0044782 | cilium organization                                                              | 369 | -0.35352 | -1.49447 | 0.00031  | 0.02533  | 0.021621 |
| GO-BP | GO:0016579 | protein deubiquitination                                                         | 250 | -0.35908 | -1.48368 | 0.001917 | 0.04433  | 0.037839 |
| GO-BP | GO:0000209 | protein polyubiquitination                                                       | 296 | -0.35466 | -1.48044 | 0.000526 | 0.02597  | 0.022167 |
| GO-BP | GO:0000086 | G2/M transition of mitotic cell cycle                                            | 237 | -0.35768 | -1.47102 | 0.002147 | 0.047073 | 0.04018  |
| GO-BP | GO:0051052 | regulation of DNA metabolic process                                              | 408 | -0.34458 | -1.4635  | 0.000308 | 0.02533  | 0.021621 |
| GO-BP | GO:0043161 | proteasome-mediated ubiquitin-dependent protein catabolic process                | 401 | -0.34248 | -1.45365 | 0.000308 | 0.02533  | 0.021621 |
| GO-BP | GO:0040029 | regulation of gene expression, epigenetic                                        | 322 | -0.34402 | -1.44314 | 0.001568 | 0.040413 | 0.034496 |
| GO-BP | GO:0030098 | lymphocyte differentiation                                                       | 343 | -0.33994 | -1.43142 | 0.001247 | 0.036071 | 0.030789 |
| GO-BP | GO:0016569 | covalent chromatin modification                                                  | 452 | -0.33544 | -1.43132 | 0.00051  | 0.025683 | 0.021922 |
| GO-BP | GO:0033044 | regulation of chromosome organization                                            | 327 | -0.33957 | -1.42529 | 0.002195 | 0.047407 | 0.040465 |
| GO-BP | GO:0016570 | histone modification                                                             | 436 | -0.33333 | -1.41954 | 0.000716 | 0.027687 | 0.023633 |
| GO-BP | GO:0048285 | organelle fission                                                                | 430 | -0.33241 | -1.4152  | 0.000716 | 0.027687 | 0.023633 |
| GO-BP | GO:0016311 | dephosphorylation                                                                | 460 | -0.32829 | -1.40154 | 0.001018 | 0.032398 | 0.027654 |
| GO-BP | GO:0010498 | proteasomal protein catabolic process                                            | 453 | -0.32584 | -1.39002 | 0.00153  | 0.040114 | 0.03424  |
| GO-BP | GO:1903522 | regulation of blood circulation                                                  | 278 | 0.262742 | 1.40914  | 0.001808 | 0.042887 | 0.036607 |
| GO-BP | GO:0043281 | regulation of cysteine-type endopeptidase activity involved in apoptotic process | 203 | 0.282852 | 1.455909 | 0.002309 | 0.04809  | 0.041048 |
| GO-BP | GO:0007188 | adenylate cyclase-modulating G protein-coupled receptor signaling pathway        | 207 | 0.283458 | 1.456616 | 0.002398 | 0.049218 | 0.042011 |
| GO-BP | GO:0051701 | interaction with host                                                            | 194 | 0.287034 | 1.471945 | 0.002255 | 0.047635 | 0.04066  |
| GO-BP | GO:0010951 | negative regulation of endopeptidase activity                                    | 220 | 0.285455 | 1.483236 | 0.001335 | 0.037366 | 0.031895 |
| GO-BP | GO:0051147 | regulation of muscle cell differentiation                                        | 146 | 0.301132 | 1.484773 | 0.002431 | 0.049316 | 0.042094 |
| GO-BP | GO:0045765 | regulation of angiogenesis                                                       | 278 | 0.276976 | 1.48548  | 0.001808 | 0.042887 | 0.036607 |
| GO-BP | GO:0098742 | cell-cell adhesion via                                                           | 243 | 0.282447 | 1.485911 | 0.00152  | 0.040114 | 0.03424  |

|       |            |                                                                |     |          |          |          |          |          |  |
|-------|------------|----------------------------------------------------------------|-----|----------|----------|----------|----------|----------|--|
|       |            | plasma-membrane adhesion molecules                             |     |          |          |          |          |          |  |
| GO-BP | GO:0002221 | pattern recognition receptor signaling pathway                 | 187 | 0.292381 | 1.490392 | 0.002144 | 0.047073 | 0.04018  |  |
| GO-BP | GO:0051092 | positive regulation of NF-kappaB transcription factor activity | 143 | 0.304199 | 1.492319 | 0.001599 | 0.041048 | 0.035037 |  |
| GO-BP | GO:0071466 | cellular response to xenobiotic stimulus                       | 163 | 0.299086 | 1.494475 | 0.001838 | 0.043243 | 0.036911 |  |
| GO-BP | GO:0051924 | regulation of calcium ion transport                            | 241 | 0.284038 | 1.494583 | 0.001488 | 0.039489 | 0.033707 |  |
| GO-BP | GO:0048167 | regulation of synaptic plasticity                              | 181 | 0.294907 | 1.499279 | 0.002035 | 0.046238 | 0.039467 |  |
| GO-BP | GO:0006941 | striated muscle contraction                                    | 163 | 0.300514 | 1.501608 | 0.001838 | 0.043243 | 0.036911 |  |
| GO-BP | GO:0031348 | negative regulation of defense response                        | 196 | 0.292454 | 1.50263  | 0.002193 | 0.047407 | 0.040465 |  |
| GO-BP | GO:0043901 | negative regulation of multi-organism process                  | 154 | 0.303825 | 1.503406 | 0.00175  | 0.042183 | 0.036006 |  |
| GO-BP | GO:0032635 | interleukin-6 production                                       | 141 | 0.309408 | 1.514616 | 0.001553 | 0.040225 | 0.034335 |  |
| GO-BP | GO:0002793 | positive regulation of peptide secretion                       | 274 | 0.283736 | 1.516515 | 0.001799 | 0.042887 | 0.036607 |  |
| GO-BP | GO:0050920 | regulation of chemotaxis                                       | 204 | 0.295138 | 1.519312 | 0.002307 | 0.04809  | 0.041048 |  |
| GO-BP | GO:0050777 | negative regulation of immune response                         | 144 | 0.309499 | 1.52051  | 0.001612 | 0.041075 | 0.035061 |  |
| GO-BP | GO:0034341 | response to interferon-gamma                                   | 178 | 0.29972  | 1.521393 | 0.001992 | 0.04548  | 0.03882  |  |
| GO-BP | GO:0032675 | regulation of interleukin-6 production                         | 132 | 0.31619  | 1.530601 | 0.00145  | 0.038842 | 0.033154 |  |
| GO-BP | GO:0050729 | positive regulation of inflammatory response                   | 132 | 0.316584 | 1.532511 | 0.00145  | 0.038842 | 0.033154 |  |
| GO-BP | GO:0015893 | drug transport                                                 | 200 | 0.298577 | 1.537895 | 0.001124 | 0.033836 | 0.028881 |  |
| GO-BP | GO:0055001 | muscle cell development                                        | 168 | 0.305553 | 1.538977 | 0.000934 | 0.031135 | 0.026576 |  |
| GO-BP | GO:0042737 | drug catabolic process                                         | 127 | 0.320083 | 1.539669 | 0.002092 | 0.046571 | 0.039751 |  |
| GO-BP | GO:0045766 | positive regulation of angiogenesis                            | 159 | 0.309483 | 1.541673 | 0.000899 | 0.030576 | 0.026098 |  |
| GO-BP | GO:0060078 | regulation of postsynaptic membrane potential                  | 134 | 0.318423 | 1.544297 | 0.001486 | 0.039489 | 0.033707 |  |
| GO-BP | GO:0008217 | regulation of blood pressure                                   | 175 | 0.305447 | 1.54445  | 0.000983 | 0.031602 | 0.026974 |  |
| GO-BP | GO:0043271 | negative regulation of ion transport                           | 139 | 0.316124 | 1.546297 | 0.001541 | 0.040154 | 0.034274 |  |
| GO-BP | GO:1903034 | regulation of response to wounding                             | 165 | 0.309587 | 1.554454 | 0.000917 | 0.031017 | 0.026475 |  |
| GO-BP | GO:0050714 | positive regulation of protein secretion                       | 254 | 0.294511 | 1.557692 | 0.001623 | 0.041075 | 0.035061 |  |
| GO-BP | GO:1904018 | positive regulation of vasculature development                 | 179 | 0.307    | 1.561234 | 0.001996 | 0.04548  | 0.03882  |  |
| GO-BP | GO:0055007 | cardiac muscle cell differentiation                            | 110 | 0.334764 | 1.576936 | 0.002459 | 0.049534 | 0.042281 |  |
| GO-BP | GO:0051146 | striated muscle cell differentiation                           | 262 | 0.296822 | 1.578102 | 0.001715 | 0.041587 | 0.035497 |  |
| GO-BP | GO:0032102 | negative regulation of response to external stimulus           | 317 | 0.290701 | 1.578403 | 0.002208 | 0.047407 | 0.040465 |  |
| GO-BP | GO:0050766 | positive regulation of phagocytosis                            | 63  | 0.37337  | 1.586044 | 0.001754 | 0.042183 | 0.036006 |  |
| GO-BP | GO:0060191 | regulation of lipase activity                                  | 93  | 0.347593 | 1.592091 | 0.002203 | 0.047407 | 0.040465 |  |
| GO-BP | GO:0045637 | regulation of myeloid cell differentiation                     | 222 | 0.306583 | 1.594598 | 0.001359 | 0.037904 | 0.032354 |  |
| GO-BP | GO:0045807 | positive regulation of endocytosis                             | 143 | 0.326991 | 1.604132 | 0.000799 | 0.029038 | 0.024786 |  |
| GO-BP | GO:1903035 | negative regulation of response to                             | 88  | 0.354332 | 1.609864 | 0.002146 | 0.047073 | 0.04018  |  |



|       |            |                                                                                           |     |          |          |          |          |          |  |
|-------|------------|-------------------------------------------------------------------------------------------|-----|----------|----------|----------|----------|----------|--|
|       |            | wounding                                                                                  |     |          |          |          |          |          |  |
| GO-BP | GO:1903426 | regulation of reactive oxygen species biosynthetic process                                | 82  | 0.361185 | 1.616126 | 0.00102  | 0.032398 | 0.027654 |  |
| GO-BP | GO:0002673 | regulation of acute inflammatory response                                                 | 94  | 0.352497 | 1.616557 | 0.002228 | 0.047539 | 0.040578 |  |
| GO-BP | GO:1990748 | cellular detoxification                                                                   | 103 | 0.347858 | 1.621243 | 0.002374 | 0.048946 | 0.041779 |  |
| GO-BP | GO:0001818 | negative regulation of cytokine production                                                | 259 | 0.305264 | 1.621558 | 0.001689 | 0.041246 | 0.035207 |  |
| GO-BP | GO:0002685 | regulation of leukocyte migration                                                         | 186 | 0.320435 | 1.631005 | 0.001079 | 0.033277 | 0.028404 |  |
| GO-BP | GO:0021782 | glial cell development                                                                    | 108 | 0.348168 | 1.636144 | 0.001217 | 0.035318 | 0.030146 |  |
| GO-BP | GO:0022617 | extracellular matrix disassembly                                                          | 75  | 0.371254 | 1.639795 | 0.002379 | 0.048946 | 0.041779 |  |
| GO-BP | GO:0072347 | response to anesthetic                                                                    | 73  | 0.37386  | 1.640975 | 0.001872 | 0.043796 | 0.037383 |  |
| GO-BP | GO:1903036 | positive regulation of response to wounding                                               | 63  | 0.388307 | 1.649496 | 0.000877 | 0.030178 | 0.025759 |  |
| GO-BP | GO:0015696 | ammonium transport                                                                        | 100 | 0.356018 | 1.653177 | 0.001168 | 0.034566 | 0.029504 |  |
| GO-BP | GO:0031663 | lipopolysaccharide-mediated signaling pathway                                             | 56  | 0.398689 | 1.656023 | 0.002454 | 0.049534 | 0.042281 |  |
| GO-BP | GO:0007586 | digestion                                                                                 | 125 | 0.346256 | 1.660911 | 0.000694 | 0.027687 | 0.023633 |  |
| GO-BP | GO:0098869 | cellular oxidant detoxification                                                           | 93  | 0.362876 | 1.662093 | 0.002203 | 0.047407 | 0.040465 |  |
| GO-BP | GO:0051153 | regulation of striated muscle cell differentiation                                        | 96  | 0.361933 | 1.666782 | 0.001691 | 0.041246 | 0.035207 |  |
| GO-BP | GO:0006937 | regulation of muscle contraction                                                          | 157 | 0.336345 | 1.672233 | 0.000896 | 0.030576 | 0.026098 |  |
| GO-BP | GO:0006936 | muscle contraction                                                                        | 340 | 0.304399 | 1.67694  | 0.002469 | 0.049634 | 0.042366 |  |
| GO-BP | GO:0032755 | positive regulation of interleukin-6 production                                           | 89  | 0.369472 | 1.681682 | 0.001621 | 0.041075 | 0.035061 |  |
| GO-BP | GO:0032103 | positive regulation of response to external stimulus                                      | 296 | 0.311386 | 1.682108 | 0.002045 | 0.046291 | 0.039512 |  |
| GO-BP | GO:1903556 | negative regulation of tumor necrosis factor superfamily cytokine production              | 57  | 0.403134 | 1.682566 | 0.001656 | 0.04119  | 0.035159 |  |
| GO-BP | GO:0097529 | myeloid leukocyte migration                                                               | 194 | 0.328597 | 1.685086 | 0.001127 | 0.033836 | 0.028881 |  |
| GO-BP | GO:0060326 | cell chemotaxis                                                                           | 275 | 0.31505  | 1.686536 | 0.001789 | 0.042887 | 0.036607 |  |
| GO-BP | GO:0003073 | regulation of systemic arterial blood pressure                                            | 91  | 0.369629 | 1.688578 | 0.001636 | 0.04119  | 0.035159 |  |
| GO-BP | GO:0034121 | regulation of toll-like receptor signaling pathway                                        | 66  | 0.393298 | 1.690948 | 0.000442 | 0.025664 | 0.021906 |  |
| GO-BP | GO:0072376 | protein activation cascade                                                                | 96  | 0.367638 | 1.693056 | 0.000564 | 0.026201 | 0.022365 |  |
| GO-BP | GO:0030595 | leukocyte chemotaxis                                                                      | 205 | 0.331127 | 1.701531 | 0.001183 | 0.034882 | 0.029774 |  |
| GO-BP | GO:0042310 | vasoconstriction                                                                          | 75  | 0.385776 | 1.703936 | 0.000476 | 0.025683 | 0.021922 |  |
| GO-BP | GO:0043154 | negative regulation of cysteine-type endopeptidase activity involved in apoptotic process | 79  | 0.38261  | 1.709168 | 0.000491 | 0.025683 | 0.021922 |  |
| GO-BP | GO:0070527 | platelet aggregation                                                                      | 57  | 0.410214 | 1.712116 | 0.000414 | 0.025369 | 0.021654 |  |
| GO-BP | GO:0001836 | release of cytochrome c from mitochondria                                                 | 58  | 0.408816 | 1.713748 | 0.000834 | 0.029038 | 0.024786 |  |

|       |            |                                                              |     |          |          |          |          |          |
|-------|------------|--------------------------------------------------------------|-----|----------|----------|----------|----------|----------|
| GO-BP | GO:2000377 | regulation of reactive oxygen species metabolic process      | 174 | 0.340323 | 1.721875 | 0.00097  | 0.031557 | 0.026936 |
| GO-BP | GO:0071216 | cellular response to biotic stimulus                         | 216 | 0.332033 | 1.721901 | 0.00129  | 0.037189 | 0.031743 |
| GO-BP | GO:0006949 | syncytium formation                                          | 56  | 0.414604 | 1.722131 | 0.000818 | 0.029038 | 0.024786 |
| GO-BP | GO:0097006 | regulation of plasma lipoprotein particle levels             | 82  | 0.385477 | 1.724822 | 0.00051  | 0.025683 | 0.021922 |
| GO-BP | GO:0015695 | organic cation transport                                     | 34  | 0.469793 | 1.724896 | 0.001995 | 0.04548  | 0.03882  |
| GO-BP | GO:0033273 | response to vitamin                                          | 88  | 0.379813 | 1.725634 | 0.000536 | 0.02597  | 0.022167 |
| GO-BP | GO:2000117 | negative regulation of cysteine-type endopeptidase activity  | 87  | 0.383379 | 1.731113 | 0.000537 | 0.02597  | 0.022167 |
| GO-BP | GO:0007596 | blood coagulation                                            | 318 | 0.320142 | 1.734968 | 0.002268 | 0.047789 | 0.040791 |
| GO-BP | GO:0098754 | detoxification                                               | 119 | 0.363404 | 1.73571  | 0.000657 | 0.027609 | 0.023566 |
| GO-BP | GO:0019233 | sensory perception of pain                                   | 101 | 0.373149 | 1.736415 | 0.000585 | 0.026355 | 0.022496 |
| GO-BP | GO:0032496 | response to lipopolysaccharide                               | 308 | 0.321144 | 1.737281 | 0.002083 | 0.046571 | 0.039751 |
| GO-BP | GO:0007599 | hemostasis                                                   | 323 | 0.318909 | 1.740481 | 0.002309 | 0.04809  | 0.041048 |
| GO-BP | GO:0050764 | regulation of phagocytosis                                   | 88  | 0.383288 | 1.741419 | 0.000536 | 0.02597  | 0.022167 |
| GO-BP | GO:0072593 | reactive oxygen species metabolic process                    | 256 | 0.328402 | 1.743262 | 0.001645 | 0.04119  | 0.035159 |
| GO-BP | GO:0030168 | platelet activation                                          | 149 | 0.353635 | 1.745788 | 0.000826 | 0.029038 | 0.024786 |
| GO-BP | GO:0002573 | myeloid leukocyte differentiation                            | 195 | 0.341209 | 1.747319 | 0.001131 | 0.033836 | 0.028881 |
| GO-BP | GO:2001238 | positive regulation of extrinsic apoptotic signaling pathway | 48  | 0.433825 | 1.748656 | 0.002255 | 0.047635 | 0.04066  |
| GO-BP | GO:0035821 | modification of morphology or physiology of other organism   | 148 | 0.354831 | 1.750575 | 0.000822 | 0.029038 | 0.024786 |
| GO-BP | GO:2000249 | regulation of actin cytoskeleton reorganization              | 37  | 0.467012 | 1.75097  | 0.00208  | 0.046571 | 0.039751 |
| GO-BP | GO:0046470 | phosphatidylcholine metabolic process                        | 80  | 0.391698 | 1.751734 | 0.000496 | 0.025683 | 0.021922 |
| GO-BP | GO:0070268 | cornification                                                | 95  | 0.381528 | 1.751747 | 0.000562 | 0.026201 | 0.022365 |
| GO-BP | GO:0032963 | collagen metabolic process                                   | 103 | 0.375989 | 1.75235  | 0.000593 | 0.026355 | 0.022496 |
| GO-BP | GO:0032651 | regulation of interleukin-1 beta production                  | 73  | 0.399739 | 1.754564 | 0.000468 | 0.025683 | 0.021922 |
| GO-BP | GO:0050817 | coagulation                                                  | 322 | 0.321592 | 1.754619 | 0.002294 | 0.04809  | 0.041048 |
| GO-BP | GO:0046645 | positive regulation of gamma-delta T cell activation         | 5   | 0.867023 | 1.756828 | 0.002436 | 0.049316 | 0.042094 |
| GO-BP | GO:0030593 | neutrophil chemotaxis                                        | 94  | 0.38325  | 1.757589 | 0.000557 | 0.026201 | 0.022365 |
| GO-BP | GO:0071526 | semaphorin-plexin signaling pathway                          | 40  | 0.459679 | 1.761576 | 0.001421 | 0.038842 | 0.033154 |
| GO-BP | GO:0051930 | regulation of sensory perception of pain                     | 38  | 0.467718 | 1.764658 | 0.001412 | 0.038842 | 0.033154 |
| GO-BP | GO:0051931 | regulation of sensory perception                             | 39  | 0.464232 | 1.765562 | 0.00248  | 0.04973  | 0.042448 |
| GO-BP | GO:0002237 | response to molecule of bacterial origin                     | 319 | 0.325053 | 1.767148 | 0.002247 | 0.047635 | 0.04066  |
| GO-BP | GO:0071222 | cellular response to lipopolysaccharide                      | 185 | 0.348104 | 1.770747 | 0.001082 | 0.033277 | 0.028404 |
| GO-BP | GO:0030100 | regulation of endocytosis                                    | 260 | 0.334298 | 1.778519 | 0.001686 | 0.041246 | 0.035207 |
| GO-BP | GO:0072656 | maintenance of protein location in                           | 5   | 0.879493 | 1.782096 | 0.001329 | 0.037317 | 0.031853 |

|       |            |                                                       |     |          |          |          |          |          |  |
|-------|------------|-------------------------------------------------------|-----|----------|----------|----------|----------|----------|--|
|       |            | mitochondrion                                         |     |          |          |          |          |          |  |
| GO-BP | GO:2001199 | negative regulation of dendritic cell differentiation | 6   | 0.82613  | 1.782153 | 0.002234 | 0.047545 | 0.040583 |  |
| GO-BP | GO:0030851 | granulocyte differentiation                           | 32  | 0.49471  | 1.78584  | 0.001312 | 0.037238 | 0.031785 |  |
| GO-BP | GO:0045806 | negative regulation of endocytosis                    | 59  | 0.426084 | 1.788885 | 0.000421 | 0.025369 | 0.021654 |  |
| GO-BP | GO:0002526 | acute inflammatory response                           | 150 | 0.362045 | 1.789414 | 0.000831 | 0.029038 | 0.024786 |  |
| GO-BP | GO:0000768 | syncytium formation by plasma membrane fusion         | 54  | 0.433992 | 1.790073 | 0.001205 | 0.035073 | 0.029937 |  |
| GO-BP | GO:0140253 | cell-cell fusion                                      | 54  | 0.433992 | 1.790073 | 0.001205 | 0.035073 | 0.029937 |  |
| GO-BP | GO:1902622 | regulation of neutrophil migration                    | 35  | 0.483725 | 1.790574 | 0.00101  | 0.032323 | 0.02759  |  |
| GO-BP | GO:0031424 | keratinization                                        | 135 | 0.368883 | 1.791637 | 0.00075  | 0.028393 | 0.024235 |  |
| GO-BP | GO:0050715 | positive regulation of cytokine secretion             | 129 | 0.371865 | 1.79306  | 0.000704 | 0.027687 | 0.023633 |  |
| GO-BP | GO:2001137 | positive regulation of endocytic recycling            | 5   | 0.885484 | 1.794235 | 0.001329 | 0.037317 | 0.031853 |  |
| GO-BP | GO:0150076 | neuroinflammatory response                            | 60  | 0.425634 | 1.794778 | 0.000426 | 0.025369 | 0.021654 |  |
| GO-BP | GO:0015682 | ferric iron transport                                 | 37  | 0.479223 | 1.79675  | 0.00104  | 0.032569 | 0.0278   |  |
| GO-BP | GO:0072512 | trivalent inorganic cation transport                  | 37  | 0.479223 | 1.79675  | 0.00104  | 0.032569 | 0.0278   |  |
| GO-BP | GO:0032732 | positive regulation of interleukin-1 production       | 53  | 0.437225 | 1.797057 | 0.000795 | 0.029038 | 0.024786 |  |
| GO-BP | GO:0006898 | receptor-mediated endocytosis                         | 247 | 0.33982  | 1.797175 | 0.001527 | 0.040114 | 0.03424  |  |
| GO-BP | GO:0050818 | regulation of coagulation                             | 81  | 0.402423 | 1.79985  | 0.000507 | 0.025683 | 0.021922 |  |
| GO-BP | GO:0071622 | regulation of granulocyte chemotaxis                  | 43  | 0.463166 | 1.81374  | 0.002164 | 0.047319 | 0.04039  |  |
| GO-BP | GO:0006801 | superoxide metabolic process                          | 67  | 0.420672 | 1.815185 | 0.000447 | 0.025683 | 0.021922 |  |
| GO-BP | GO:0036155 | acylglycerol acyl-chain remodeling                    | 5   | 0.899404 | 1.822441 | 0.001107 | 0.033703 | 0.028768 |  |
| GO-BP | GO:1900046 | regulation of hemostasis                              | 79  | 0.408446 | 1.824581 | 0.000491 | 0.025683 | 0.021922 |  |
| GO-BP | GO:0006909 | phagocytosis                                          | 254 | 0.345171 | 1.825637 | 0.001623 | 0.041075 | 0.035061 |  |
| GO-BP | GO:0006959 | humoral immune response                               | 238 | 0.347576 | 1.825949 | 0.00146  | 0.038977 | 0.03327  |  |
| GO-BP | GO:0032534 | regulation of microvillus assembly                    | 6   | 0.846715 | 1.82656  | 0.001117 | 0.03376  | 0.028817 |  |
| GO-BP | GO:0032640 | tumor necrosis factor production                      | 139 | 0.373939 | 1.829097 | 0.00077  | 0.028657 | 0.024461 |  |
| GO-BP | GO:0002687 | positive regulation of leukocyte migration            | 124 | 0.383698 | 1.83457  | 0.000701 | 0.027687 | 0.023633 |  |
| GO-BP | GO:0032680 | regulation of tumor necrosis factor production        | 136 | 0.377544 | 1.839345 | 0.000749 | 0.028393 | 0.024235 |  |
| GO-BP | GO:0032570 | response to progesterone                              | 43  | 0.470399 | 1.842064 | 0.001442 | 0.038842 | 0.033154 |  |
| GO-BP | GO:0030193 | regulation of blood coagulation                       | 78  | 0.413365 | 1.843641 | 0.000483 | 0.025683 | 0.021922 |  |
| GO-BP | GO:0033572 | transferrin transport                                 | 35  | 0.498303 | 1.844536 | 0.000337 | 0.02533  | 0.021621 |  |
| GO-BP | GO:1903901 | negative regulation of viral life cycle               | 76  | 0.417251 | 1.845026 | 0.000484 | 0.025683 | 0.021922 |  |
| GO-BP | GO:2001181 | positive regulation of interleukin-10 secretion       | 5   | 0.912551 | 1.849079 | 0.000664 | 0.027687 | 0.023633 |  |
| GO-BP | GO:0071219 | cellular response to molecule of bacterial origin     | 192 | 0.360515 | 1.850244 | 0.001101 | 0.033635 | 0.02871  |  |
| GO-BP | GO:0071706 | tumor necrosis factor superfamily cytokine production | 144 | 0.376683 | 1.850568 | 0.000806 | 0.029038 | 0.024786 |  |

|       |            |                                                                     |     |          |          |          |          |          |
|-------|------------|---------------------------------------------------------------------|-----|----------|----------|----------|----------|----------|
| GO-BP | GO:0001906 | cell killing                                                        | 151 | 0.375187 | 1.852249 | 0.00084  | 0.029116 | 0.024853 |
| GO-BP | GO:0033006 | regulation of mast cell activation involved in immune response      | 32  | 0.51429  | 1.85652  | 0.000984 | 0.031602 | 0.026974 |
| GO-BP | GO:0048680 | positive regulation of axon regeneration                            | 8   | 0.785579 | 1.856574 | 0.002122 | 0.047    | 0.040118 |
| GO-BP | GO:0032611 | interleukin-1 beta production                                       | 84  | 0.412509 | 1.859598 | 0.00051  | 0.025683 | 0.021922 |
| GO-BP | GO:1901186 | positive regulation of ERBB signaling pathway                       | 31  | 0.519123 | 1.860294 | 0.000975 | 0.031557 | 0.026936 |
| GO-BP | GO:0051187 | cofactor catabolic process                                          | 54  | 0.452078 | 1.86467  | 0.000402 | 0.02533  | 0.021621 |
| GO-BP | GO:0050707 | regulation of cytokine secretion                                    | 189 | 0.364897 | 1.865329 | 0.001083 | 0.033277 | 0.028404 |
| GO-BP | GO:0030212 | hyaluronan metabolic process                                        | 37  | 0.49828  | 1.868201 | 0.00104  | 0.032569 | 0.0278   |
| GO-BP | GO:0001774 | microglial cell activation                                          | 41  | 0.48445  | 1.869387 | 0.000717 | 0.027687 | 0.023633 |
| GO-BP | GO:0002269 | leukocyte activation involved in inflammatory response              | 41  | 0.48445  | 1.869387 | 0.000717 | 0.027687 | 0.023633 |
| GO-BP | GO:0018149 | peptide cross-linking                                               | 42  | 0.480849 | 1.871826 | 0.000719 | 0.027687 | 0.023633 |
| GO-BP | GO:0043304 | regulation of mast cell degranulation                               | 31  | 0.522412 | 1.872081 | 0.000975 | 0.031557 | 0.026936 |
| GO-BP | GO:0006953 | acute-phase response                                                | 42  | 0.482311 | 1.877516 | 0.000719 | 0.027687 | 0.023633 |
| GO-BP | GO:0014902 | myotube differentiation                                             | 103 | 0.403057 | 1.878504 | 0.000593 | 0.026355 | 0.022496 |
| GO-BP | GO:0006027 | glycosaminoglycan catabolic process                                 | 60  | 0.445947 | 1.880433 | 0.000426 | 0.025369 | 0.021654 |
| GO-BP | GO:0006833 | water transport                                                     | 18  | 0.608355 | 1.887199 | 0.002205 | 0.047407 | 0.040465 |
| GO-BP | GO:0032490 | detection of molecule of bacterial origin                           | 10  | 0.736507 | 1.889378 | 0.002411 | 0.049218 | 0.042011 |
| GO-BP | GO:1903555 | regulation of tumor necrosis factor superfamily cytokine production | 139 | 0.386576 | 1.890909 | 0.00077  | 0.028657 | 0.024461 |
| GO-BP | GO:0032652 | regulation of interleukin-1 production                              | 85  | 0.419221 | 1.891831 | 0.000518 | 0.025784 | 0.022008 |
| GO-BP | GO:1990266 | neutrophil migration                                                | 108 | 0.403582 | 1.89655  | 0.000609 | 0.026805 | 0.02288  |
| GO-BP | GO:0007588 | excretion                                                           | 59  | 0.451898 | 1.897261 | 0.000421 | 0.025369 | 0.021654 |
| GO-BP | GO:0072606 | interleukin-8 secretion                                             | 28  | 0.543276 | 1.898838 | 0.001883 | 0.043946 | 0.037511 |
| GO-BP | GO:0050433 | regulation of catecholamine secretion                               | 54  | 0.460373 | 1.898883 | 0.000402 | 0.02533  | 0.021621 |
| GO-BP | GO:2001179 | regulation of interleukin-10 secretion                              | 7   | 0.833584 | 1.901744 | 0.00114  | 0.033981 | 0.029005 |
| GO-BP | GO:2000482 | regulation of interleukin-8 secretion                               | 24  | 0.568386 | 1.910758 | 0.002099 | 0.046605 | 0.039781 |
| GO-BP | GO:0030049 | muscle filament sliding                                             | 39  | 0.504099 | 1.917186 | 0.000708 | 0.027687 | 0.023633 |
| GO-BP | GO:0033275 | actin-myosin filament sliding                                       | 39  | 0.504099 | 1.917186 | 0.000708 | 0.027687 | 0.023633 |
| GO-BP | GO:0007218 | neuropeptide signaling pathway                                      | 93  | 0.419613 | 1.92197  | 0.000551 | 0.026077 | 0.022259 |
| GO-BP | GO:0032148 | activation of protein kinase B activity                             | 31  | 0.537612 | 1.926552 | 0.00065  | 0.027472 | 0.02345  |
| GO-BP | GO:0002251 | organ or tissue specific immune response                            | 31  | 0.537738 | 1.927002 | 0.00065  | 0.027472 | 0.02345  |
| GO-BP | GO:1903011 | negative regulation of bone development                             | 9   | 0.778454 | 1.927026 | 0.00095  | 0.031207 | 0.026637 |
| GO-BP | GO:0042744 | hydrogen peroxide catabolic process                                 | 28  | 0.551408 | 1.92726  | 0.001569 | 0.040413 | 0.034496 |
| GO-BP | GO:0061515 | myeloid cell development                                            | 69  | 0.445669 | 1.927916 | 0.000458 | 0.025683 | 0.021922 |
| GO-BP | GO:0032760 | positive regulation of tumor necrosis factor production             | 79  | 0.432512 | 1.932085 | 0.000491 | 0.025683 | 0.021922 |
| GO-BP | GO:0030574 | collagen catabolic process                                          | 46  | 0.485853 | 1.934051 | 0.000745 | 0.028393 | 0.024235 |

|       |            |                                                                              |     |          |          |          |          |          |
|-------|------------|------------------------------------------------------------------------------|-----|----------|----------|----------|----------|----------|
| GO-BP | GO:0045630 | positive regulation of T-helper 2 cell differentiation                       | 7   | 0.848545 | 1.935876 | 0.000684 | 0.027687 | 0.023633 |
| GO-BP | GO:0002385 | mucosal immune response                                                      | 29  | 0.547078 | 1.93771  | 0.000937 | 0.031135 | 0.026576 |
| GO-BP | GO:0006026 | aminoglycan catabolic process                                                | 64  | 0.45533  | 1.939805 | 0.000441 | 0.025664 | 0.021906 |
| GO-BP | GO:0050432 | catecholamine secretion                                                      | 56  | 0.467094 | 1.940158 | 0.000409 | 0.025369 | 0.021654 |
| GO-BP | GO:0002741 | positive regulation of cytokine secretion involved in immune response        | 8   | 0.822665 | 1.94422  | 0.000472 | 0.025683 | 0.021922 |
| GO-BP | GO:0042116 | macrophage activation                                                        | 83  | 0.434177 | 1.949077 | 0.00051  | 0.025683 | 0.021922 |
| GO-BP | GO:0071621 | granulocyte chemotaxis                                                       | 113 | 0.411713 | 1.950258 | 0.000622 | 0.026947 | 0.023001 |
| GO-BP | GO:0045410 | positive regulation of interleukin-6 biosynthetic process                    | 15  | 0.668836 | 1.9513   | 0.001329 | 0.037317 | 0.031853 |
| GO-BP | GO:0051937 | catecholamine transport                                                      | 69  | 0.451149 | 1.951622 | 0.000458 | 0.025683 | 0.021922 |
| GO-BP | GO:0045071 | negative regulation of viral genome replication                              | 53  | 0.475103 | 1.95274  | 0.000398 | 0.02533  | 0.021621 |
| GO-BP | GO:0002888 | positive regulation of myeloid leukocyte mediated immunity                   | 31  | 0.546247 | 1.957495 | 0.00065  | 0.027472 | 0.02345  |
| GO-BP | GO:0070572 | positive regulation of neuron projection regeneration                        | 9   | 0.791512 | 1.95935  | 0.000713 | 0.027687 | 0.023633 |
| GO-BP | GO:0070944 | neutrophil mediated killing of bacterium                                     | 7   | 0.859268 | 1.960341 | 0.000684 | 0.027687 | 0.023633 |
| GO-BP | GO:0050663 | cytokine secretion                                                           | 217 | 0.37869  | 1.962945 | 0.001311 | 0.037238 | 0.031785 |
| GO-BP | GO:1902563 | regulation of neutrophil activation                                          | 11  | 0.741667 | 1.963006 | 0.000246 | 0.02337  | 0.019948 |
| GO-BP | GO:0097530 | granulocyte migration                                                        | 131 | 0.405866 | 1.964964 | 0.000719 | 0.027687 | 0.023633 |
| GO-BP | GO:0002576 | platelet degranulation                                                       | 122 | 0.413188 | 1.972221 | 0.000683 | 0.027687 | 0.023633 |
| GO-BP | GO:0032612 | interleukin-1 production                                                     | 97  | 0.426682 | 1.973668 | 0.000566 | 0.026201 | 0.022365 |
| GO-BP | GO:0050706 | regulation of interleukin-1 beta secretion                                   | 39  | 0.518992 | 1.973824 | 0.000354 | 0.02533  | 0.021621 |
| GO-BP | GO:1903557 | positive regulation of tumor necrosis factor superfamily cytokine production | 81  | 0.441493 | 1.974594 | 0.000507 | 0.025683 | 0.021922 |
| GO-BP | GO:0033003 | regulation of mast cell activation                                           | 42  | 0.507985 | 1.97746  | 0.000719 | 0.027687 | 0.023633 |
| GO-BP | GO:1903307 | positive regulation of regulated secretory pathway                           | 51  | 0.48584  | 1.979463 | 0.000392 | 0.02533  | 0.021621 |
| GO-BP | GO:0032930 | positive regulation of superoxide anion generation                           | 19  | 0.63209  | 1.983727 | 0.001421 | 0.038842 | 0.033154 |
| GO-BP | GO:0042226 | interleukin-6 biosynthetic process                                           | 23  | 0.595302 | 1.984568 | 0.00059  | 0.026355 | 0.022496 |
| GO-BP | GO:0043302 | positive regulation of leukocyte degranulation                               | 24  | 0.591937 | 1.98993  | 0.001199 | 0.035073 | 0.029937 |
| GO-BP | GO:0042743 | hydrogen peroxide metabolic process                                          | 52  | 0.488642 | 2.001672 | 0.000394 | 0.02533  | 0.021621 |
| GO-BP | GO:0043277 | apoptotic cell clearance                                                     | 41  | 0.519769 | 2.005674 | 0.000358 | 0.02533  | 0.021621 |
| GO-BP | GO:2001198 | regulation of dendritic cell differentiation                                 | 11  | 0.758062 | 2.0064   | 0.000246 | 0.02337  | 0.019948 |
| GO-BP | GO:1903010 | regulation of bone development                                               | 21  | 0.617537 | 2.006526 | 0.001151 | 0.034185 | 0.029179 |
| GO-BP | GO:0050718 | positive regulation of interleukin-1 beta secretion                          | 29  | 0.566887 | 2.007873 | 0.000937 | 0.031135 | 0.026576 |

|       |            |                                                                  |    |          |          |          |          |          |
|-------|------------|------------------------------------------------------------------|----|----------|----------|----------|----------|----------|
| GO-BP | GO:0017001 | antibiotic catabolic process                                     | 52 | 0.490428 | 2.008987 | 0.000394 | 0.02533  | 0.021621 |
| GO-BP | GO:0032757 | positive regulation of interleukin-8 production                  | 47 | 0.504657 | 2.019685 | 0.000375 | 0.02533  | 0.021621 |
| GO-BP | GO:0045730 | respiratory burst                                                | 32 | 0.561263 | 2.026086 | 0.000328 | 0.02533  | 0.021621 |
| GO-BP | GO:0036035 | osteoclast development                                           | 18 | 0.653545 | 2.027383 | 0.001654 | 0.04119  | 0.035159 |
| GO-BP | GO:0042554 | superoxide anion generation                                      | 35 | 0.548688 | 2.031043 | 0.000337 | 0.02533  | 0.021621 |
| GO-BP | GO:2000379 | positive regulation of reactive oxygen species metabolic process | 92 | 0.44414  | 2.031076 | 0.000547 | 0.026077 | 0.022259 |
| GO-BP | GO:0090197 | positive regulation of chemokine secretion                       | 15 | 0.696695 | 2.032579 | 0.001063 | 0.033171 | 0.028314 |
| GO-BP | GO:0090196 | regulation of chemokine secretion                                | 16 | 0.683269 | 2.035864 | 0.000808 | 0.029038 | 0.024786 |
| GO-BP | GO:0070943 | neutrophil mediated killing of symbiont cell                     | 8  | 0.865182 | 2.044702 | 0.000236 | 0.02337  | 0.019948 |
| GO-BP | GO:0061900 | glial cell activation                                            | 48 | 0.509252 | 2.052686 | 0.000376 | 0.02533  | 0.021621 |
| GO-BP | GO:0015844 | monoamine transport                                              | 82 | 0.459649 | 2.056707 | 0.00051  | 0.025683 | 0.021922 |
| GO-BP | GO:0032928 | regulation of superoxide anion generation                        | 22 | 0.625887 | 2.062056 | 0.00058  | 0.026355 | 0.022496 |
| GO-BP | GO:0016045 | detection of bacterium                                           | 12 | 0.755906 | 2.06218  | 0.000251 | 0.02337  | 0.019948 |
| GO-BP | GO:0050716 | positive regulation of interleukin-1 secretion                   | 33 | 0.569364 | 2.072997 | 0.00033  | 0.02533  | 0.021621 |
| GO-BP | GO:0072608 | interleukin-10 secretion                                         | 9  | 0.842452 | 2.085449 | 0.000238 | 0.02337  | 0.019948 |
| GO-BP | GO:0032677 | regulation of interleukin-8 production                           | 65 | 0.488966 | 2.090991 | 0.000441 | 0.025664 | 0.021906 |
| GO-BP | GO:0098543 | detection of other organism                                      | 14 | 0.730806 | 2.096081 | 0.000517 | 0.025784 | 0.022008 |
| GO-BP | GO:0006691 | leukotriene metabolic process                                    | 27 | 0.604635 | 2.097141 | 0.000618 | 0.026889 | 0.022952 |
| GO-BP | GO:0050702 | interleukin-1 beta secretion                                     | 46 | 0.529857 | 2.109217 | 0.000372 | 0.02533  | 0.021621 |
| GO-BP | GO:0045408 | regulation of interleukin-6 biosynthetic process                 | 22 | 0.643187 | 2.119054 | 0.00058  | 0.026355 | 0.022496 |
| GO-BP | GO:0050704 | regulation of interleukin-1 secretion                            | 45 | 0.535918 | 2.122697 | 0.000366 | 0.02533  | 0.021621 |
| GO-BP | GO:0002374 | cytokine secretion involved in immune response                   | 20 | 0.666661 | 2.128898 | 0.000574 | 0.026355 | 0.022496 |
| GO-BP | GO:0032637 | interleukin-8 production                                         | 73 | 0.485369 | 2.130419 | 0.000468 | 0.025683 | 0.021922 |
| GO-BP | GO:0050819 | negative regulation of coagulation                               | 54 | 0.517543 | 2.134691 | 0.000402 | 0.02533  | 0.021621 |
| GO-BP | GO:0009620 | response to fungus                                               | 43 | 0.545541 | 2.136314 | 0.000361 | 0.02533  | 0.021621 |
| GO-BP | GO:0042730 | fibrinolysis                                                     | 28 | 0.617623 | 2.158694 | 0.000628 | 0.027049 | 0.023088 |
| GO-BP | GO:0070942 | neutrophil mediated cytotoxicity                                 | 10 | 0.841901 | 2.159746 | 0.000241 | 0.02337  | 0.019948 |
| GO-BP | GO:0035994 | response to muscle stretch                                       | 18 | 0.698162 | 2.165791 | 0.000827 | 0.029038 | 0.024786 |
| GO-BP | GO:1900047 | negative regulation of hemostasis                                | 53 | 0.527006 | 2.166068 | 0.000398 | 0.02533  | 0.021621 |
| GO-BP | GO:0097028 | dendritic cell differentiation                                   | 40 | 0.567521 | 2.174845 | 0.000355 | 0.02533  | 0.021621 |
| GO-BP | GO:0030195 | negative regulation of blood coagulation                         | 52 | 0.536008 | 2.195702 | 0.000394 | 0.02533  | 0.021621 |
| GO-BP | GO:0098581 | detection of external biotic stimulus                            | 18 | 0.711807 | 2.208118 | 0.000551 | 0.026077 | 0.022259 |
| GO-BP | GO:0002886 | regulation of myeloid leukocyte mediated immunity                | 55 | 0.534575 | 2.209917 | 0.000408 | 0.025369 | 0.021654 |
| GO-BP | GO:0050701 | interleukin-1 secretion                                          | 53 | 0.538761 | 2.214381 | 0.000398 | 0.02533  | 0.021621 |

|          |               |                                                                         |     |          |          |          |          |          |
|----------|---------------|-------------------------------------------------------------------------|-----|----------|----------|----------|----------|----------|
| GO-BP    | GO:0002227    | innate immune response in mucosa                                        | 18  | 0.7326   | 2.272623 | 0.000551 | 0.026077 | 0.022259 |
| GO-BP    | GO:0050830    | defense response to Gram-positive bacterium                             | 76  | 0.514043 | 2.273027 | 0.000484 | 0.025683 | 0.021922 |
| GO-BP    | GO:0043300    | regulation of leukocyte degranulation                                   | 46  | 0.575475 | 2.290814 | 0.000372 | 0.02533  | 0.021621 |
| GO-BP    | GO:0051852    | disruption by host of symbiont cells                                    | 12  | 0.853612 | 2.328731 | 0.000251 | 0.02337  | 0.019948 |
| GO-BP    | GO:0051873    | killing by host of symbiont cells                                       | 12  | 0.853612 | 2.328731 | 0.000251 | 0.02337  | 0.019948 |
| GO-BP    | GO:0050832    | defense response to fungus                                              | 32  | 0.672516 | 2.427695 | 0.000328 | 0.02533  | 0.021621 |
| GO-BP    | GO:0051818    | disruption of cells of other organism involved in symbiotic interaction | 15  | 0.83298  | 2.430183 | 0.000266 | 0.02337  | 0.019948 |
| GO-BP    | GO:0051883    | killing of cells in other organism involved in symbiotic interaction    | 15  | 0.83298  | 2.430183 | 0.000266 | 0.02337  | 0.019948 |
| GO-BP    | GO:0061844    | antimicrobial humoral immune response mediated by antimicrobial peptide | 65  | 0.575235 | 2.459907 | 0.000441 | 0.025664 | 0.021906 |
| GO-BP    | GO:0050829    | defense response to Gram-negative bacterium                             | 69  | 0.574604 | 2.485675 | 0.000458 | 0.025683 | 0.021922 |
| GO-BP    | GO:0019731    | antibacterial humoral response                                          | 36  | 0.670753 | 2.495245 | 0.000345 | 0.02533  | 0.021621 |
| GO-BP    | GO:0031640    | killing of cells of other organism                                      | 52  | 0.617041 | 2.527643 | 0.000394 | 0.02533  | 0.021621 |
| GO-BP    | GO:0044364    | disruption of cells of other organism                                   | 52  | 0.617041 | 2.527643 | 0.000394 | 0.02533  | 0.021621 |
| GO-BP    | GO:0019730    | antimicrobial humoral response                                          | 105 | 0.543883 | 2.537179 | 0.00061  | 0.026805 | 0.02288  |
| GO-BP    | GO:0042742    | defense response to bacterium                                           | 217 | 0.492189 | 2.551271 | 0.001311 | 0.037238 | 0.031785 |
| Reactome | R-HSA-156827  | L13a-mediated translational silencing of Ceruloplasmin expression       | 92  | -0.62146 | -2.32682 | 0.000122 | 0.00417  | 0.003278 |
| Reactome | R-HSA-72706   | GTP hydrolysis and joining of the 60S ribosomal subunit                 | 93  | -0.61947 | -2.32089 | 0.000122 | 0.00417  | 0.003278 |
| Reactome | R-HSA-1799339 | SRP-dependent cotranslational protein targeting to membrane             | 94  | -0.6166  | -2.31258 | 0.000122 | 0.00417  | 0.003278 |
| Reactome | R-HSA-72689   | Formation of a pool of free 40S subunits                                | 83  | -0.62588 | -2.31024 | 0.000124 | 0.00417  | 0.003278 |
| Reactome | R-HSA-192823  | Viral mRNA Translation                                                  | 71  | -0.6254  | -2.25075 | 0.000128 | 0.00417  | 0.003278 |
| Reactome | R-HSA-72613   | Eukaryotic Translation Initiation                                       | 100 | -0.59118 | -2.23429 | 0.000121 | 0.00417  | 0.003278 |
| Reactome | R-HSA-72737   | Cap-dependent Translation Initiation                                    | 100 | -0.59118 | -2.23429 | 0.000121 | 0.00417  | 0.003278 |
| Reactome | R-HSA-156902  | Peptide chain elongation                                                | 71  | -0.61942 | -2.22922 | 0.000128 | 0.00417  | 0.003278 |
| Reactome | R-HSA-72306   | tRNA processing                                                         | 104 | -0.58497 | -2.21976 | 0.000121 | 0.00417  | 0.003278 |
| Reactome | R-HSA-2408557 | Selenocysteine synthesis                                                | 75  | -0.60657 | -2.20475 | 0.000126 | 0.00417  | 0.003278 |
| Reactome | R-HSA-156842  | Eukaryotic Translation Elongation                                       | 73  | -0.60955 | -2.2036  | 0.000127 | 0.00417  | 0.003278 |
| Reactome | R-HSA-72764   | Eukaryotic Translation Termination                                      | 75  | -0.60535 | -2.20031 | 0.000126 | 0.00417  | 0.003278 |
| Reactome | R-HSA-72649   | Translation initiation complex formation                                | 51  | -0.63838 | -2.17879 | 0.000134 | 0.00417  | 0.003278 |
| Reactome | R-HSA-72695   | Formation of the ternary complex, and subsequently, the 43S complex     | 45  | -0.65231 | -2.17567 | 0.000137 | 0.00417  | 0.003278 |
| Reactome | R-HSA-72702   | Ribosomal scanning and start codon recognition                          | 51  | -0.63453 | -2.16565 | 0.000134 | 0.00417  | 0.003278 |
| Reactome | R-HSA-6791226 | Major pathway of rRNA processing in                                     | 159 | -0.54242 | -2.1655  | 0.000113 | 0.00417  | 0.003278 |

|          |               |                                                                                                        |     |          |          |          |          |          |  |
|----------|---------------|--------------------------------------------------------------------------------------------------------|-----|----------|----------|----------|----------|----------|--|
|          |               | the nucleolus and cytosol                                                                              |     |          |          |          |          |          |  |
| Reactome | R-HSA-975956  | Nonsense Mediated Decay (NMD) independent of the Exon Junction Complex (EJC)                           | 77  | -0.59319 | -2.16453 | 0.000126 | 0.00417  | 0.003278 |  |
| Reactome | R-HSA-159236  | Transport of Mature mRNA derived from an Intron-Containing Transcript                                  | 65  | -0.61092 | -2.1645  | 0.00013  | 0.00417  | 0.003278 |  |
| Reactome | R-HSA-72202   | Transport of Mature Transcript to Cytoplasm                                                            | 73  | -0.59758 | -2.16034 | 0.000127 | 0.00417  | 0.003278 |  |
| Reactome | R-HSA-72312   | rRNA processing                                                                                        | 178 | -0.53388 | -2.15514 | 0.000111 | 0.00417  | 0.003278 |  |
| Reactome | R-HSA-8868773 | rRNA processing in the nucleus and cytosol                                                             | 168 | -0.53462 | -2.14487 | 0.000112 | 0.00417  | 0.003278 |  |
| Reactome | R-HSA-72766   | Translation                                                                                            | 265 | -0.51039 | -2.12423 | 0.000106 | 0.00417  | 0.003278 |  |
| Reactome | R-HSA-72662   | Activation of the mRNA upon binding of the cap-binding complex and eIFs, and subsequent binding to 43S | 52  | -0.60662 | -2.07677 | 0.000134 | 0.00417  | 0.003278 |  |
| Reactome | R-HSA-159230  | Transport of the SLBP Dependant Mature mRNA                                                            | 35  | -0.65147 | -2.06864 | 0.000142 | 0.00417  | 0.003278 |  |
| Reactome | R-HSA-191859  | snRNP Assembly                                                                                         | 51  | -0.60452 | -2.06323 | 0.000134 | 0.00417  | 0.003278 |  |
| Reactome | R-HSA-194441  | Metabolism of non-coding RNA                                                                           | 51  | -0.60452 | -2.06323 | 0.000134 | 0.00417  | 0.003278 |  |
| Reactome | R-HSA-168255  | Influenza Life Cycle                                                                                   | 124 | -0.52899 | -2.05346 | 0.000117 | 0.00417  | 0.003278 |  |
| Reactome | R-HSA-168273  | Influenza Viral RNA Transcription and Replication                                                      | 116 | -0.53337 | -2.05247 | 0.000119 | 0.00417  | 0.003278 |  |
| Reactome | R-HSA-159227  | Transport of the SLBP independent Mature mRNA                                                          | 34  | -0.64559 | -2.04442 | 0.000141 | 0.00417  | 0.003278 |  |
| Reactome | R-HSA-6784531 | tRNA processing in the nucleus                                                                         | 56  | -0.58866 | -2.03814 | 0.000132 | 0.00417  | 0.003278 |  |
| Reactome | R-HSA-927802  | Nonsense-Mediated Decay (NMD)                                                                          | 94  | -0.53913 | -2.02205 | 0.000122 | 0.00417  | 0.003278 |  |
| Reactome | R-HSA-975957  | Nonsense Mediated Decay (NMD) enhanced by the Exon Junction Complex (EJC)                              | 94  | -0.53913 | -2.02205 | 0.000122 | 0.00417  | 0.003278 |  |
| Reactome | R-HSA-159234  | Transport of Mature mRNAs Derived from Intronless Transcripts                                          | 41  | -0.60888 | -1.99796 | 0.000139 | 0.00417  | 0.003278 |  |
| Reactome | R-HSA-180910  | Vpr-mediated nuclear import of PICs                                                                    | 33  | -0.63371 | -1.99336 | 0.000142 | 0.00417  | 0.003278 |  |
| Reactome | R-HSA-6782315 | tRNA modification in the nucleus and cytosol                                                           | 41  | -0.60332 | -1.97974 | 0.000139 | 0.00417  | 0.003278 |  |
| Reactome | R-HSA-168274  | Export of Viral Ribonucleoproteins from Nucleus                                                        | 31  | -0.6361  | -1.97402 | 0.000288 | 0.007323 | 0.005757 |  |
| Reactome | R-HSA-168333  | NEP/NS2 Interacts with the Cellular Export Machinery                                                   | 31  | -0.6361  | -1.97402 | 0.000288 | 0.007323 | 0.005757 |  |
| Reactome | R-HSA-159231  | Transport of Mature mRNA Derived from an Intronless Transcript                                         | 40  | -0.60203 | -1.96527 | 0.000139 | 0.00417  | 0.003278 |  |
| Reactome | R-HSA-168254  | Influenza Infection                                                                                    | 134 | -0.49733 | -1.94666 | 0.000116 | 0.00417  | 0.003278 |  |
| Reactome | R-HSA-165054  | Rev-mediated nuclear export of HIV RNA                                                                 | 34  | -0.61365 | -1.94327 | 0.000424 | 0.007947 | 0.006247 |  |
| Reactome | R-HSA-2408522 | Selenoamino acid metabolism                                                                            | 97  | -0.51617 | -1.94228 | 0.000122 | 0.00417  | 0.003278 |  |



|          |               |                                                                                   |     |          |          |          |          |          |
|----------|---------------|-----------------------------------------------------------------------------------|-----|----------|----------|----------|----------|----------|
| Reactome | R-HSA-68877   | Mitotic Prometaphase                                                              | 189 | -0.47846 | -1.93997 | 0.00011  | 0.00417  | 0.003278 |
| Reactome | R-HSA-5685938 | HDR through Single Strand Annealing (SSA)                                         | 36  | -0.60498 | -1.93318 | 0.000706 | 0.010148 | 0.007978 |
| Reactome | R-HSA-3371453 | Regulation of HSF1-mediated heat shock response                                   | 66  | -0.54329 | -1.9304  | 0.00013  | 0.00417  | 0.003278 |
| Reactome | R-HSA-177243  | Interactions of Rev with host cellular proteins                                   | 36  | -0.60407 | -1.93024 | 0.000706 | 0.010148 | 0.007978 |
| Reactome | R-HSA-176033  | Interactions of Vpr with host cellular proteins                                   | 36  | -0.60274 | -1.926   | 0.000706 | 0.010148 | 0.007978 |
| Reactome | R-HSA-3108214 | SUMOylation of DNA damage response and repair proteins                            | 74  | -0.52606 | -1.90722 | 0.000127 | 0.00417  | 0.003278 |
| Reactome | R-HSA-141424  | Amplification of signal from the kinetochores                                     | 92  | -0.50865 | -1.90445 | 0.000122 | 0.00417  | 0.003278 |
| Reactome | R-HSA-141444  | Amplification of signal from unattached kinetochores via a MAD2 inhibitory signal | 92  | -0.50865 | -1.90445 | 0.000122 | 0.00417  | 0.003278 |
| Reactome | R-HSA-180746  | Nuclear import of Rev protein                                                     | 33  | -0.60521 | -1.90372 | 0.000569 | 0.008987 | 0.007065 |
| Reactome | R-HSA-4570464 | SUMOylation of RNA binding proteins                                               | 44  | -0.56868 | -1.89066 | 0.000275 | 0.007221 | 0.005677 |
| Reactome | R-HSA-69618   | Mitotic Spindle Checkpoint                                                        | 107 | -0.4962  | -1.88991 | 0.00012  | 0.00417  | 0.003278 |
| Reactome | R-HSA-72203   | Processing of Capped Intron-Containing Pre-mRNA                                   | 228 | -0.45885 | -1.88972 | 0.000108 | 0.00417  | 0.003278 |
| Reactome | R-HSA-170822  | Regulation of Glucokinase by Glucokinase Regulatory Protein                       | 31  | -0.60625 | -1.88138 | 0.000432 | 0.007947 | 0.006247 |
| Reactome | R-HSA-5619107 | Defective TPR may confer susceptibility towards thyroid papillary carcinoma (TPC) | 31  | -0.60625 | -1.88138 | 0.000432 | 0.007947 | 0.006247 |
| Reactome | R-HSA-6804756 | Regulation of TP53 Activity through Phosphorylation                               | 90  | -0.50387 | -1.87938 | 0.000123 | 0.00417  | 0.003278 |
| Reactome | R-HSA-4085377 | SUMOylation of SUMOylation proteins                                               | 33  | -0.5936  | -1.86719 | 0.000711 | 0.010148 | 0.007978 |
| Reactome | R-HSA-2025928 | Calcineurin activates NFAT                                                        | 10  | -0.78552 | -1.86222 | 0.001019 | 0.013355 | 0.010499 |
| Reactome | R-HSA-168271  | Transport of Ribonucleoproteins into the Host Nucleus                             | 31  | -0.59864 | -1.85777 | 0.00072  | 0.010148 | 0.007978 |
| Reactome | R-HSA-5693616 | Presynaptic phase of homologous DNA pairing and strand exchange                   | 38  | -0.57448 | -1.85593 | 0.001121 | 0.014587 | 0.011467 |
| Reactome | R-HSA-5693579 | Homologous DNA Pairing and Strand Exchange                                        | 41  | -0.56234 | -1.84527 | 0.000972 | 0.01283  | 0.010086 |
| Reactome | R-HSA-5696395 | Formation of Incision Complex in GG-NER                                           | 41  | -0.56212 | -1.84455 | 0.000972 | 0.01283  | 0.010086 |
| Reactome | R-HSA-5620922 | BBSome-mediated cargo-targeting to cilium                                         | 22  | -0.63761 | -1.84055 | 0.001212 | 0.014874 | 0.011693 |
| Reactome | R-HSA-2173796 | SMAD2/SMAD3:SMAD4 heterotrimer regulates transcription                            | 32  | -0.58751 | -1.83647 | 0.001144 | 0.014642 | 0.011511 |
| Reactome | R-HSA-2980766 | Nuclear Envelope Breakdown                                                        | 52  | -0.53591 | -1.8347  | 0.000535 | 0.008728 | 0.006861 |

|          |               |                                                            |     |          |          |          |          |          |
|----------|---------------|------------------------------------------------------------|-----|----------|----------|----------|----------|----------|
| Reactome | R-HSA-3301854 | Nuclear Pore Complex (NPC) Disassembly                     | 35  | -0.57657 | -1.83083 | 0.001276 | 0.01554  | 0.012216 |
| Reactome | R-HSA-168276  | NS1 Mediated Effects on Host Pathways                      | 39  | -0.56286 | -1.82721 | 0.001541 | 0.018134 | 0.014255 |
| Reactome | R-HSA-5620920 | Cargo trafficking to the periciliary membrane              | 48  | -0.53403 | -1.80667 | 0.000811 | 0.011142 | 0.008759 |
| Reactome | R-HSA-6790901 | rRNA modification in the nucleus and cytosol               | 57  | -0.51776 | -1.79951 | 0.000264 | 0.007025 | 0.005523 |
| Reactome | R-HSA-73856   | RNA Polymerase II Transcription Termination                | 58  | -0.51555 | -1.79701 | 0.000396 | 0.007795 | 0.006128 |
| Reactome | R-HSA-3371556 | Cellular response to heat stress                           | 86  | -0.48312 | -1.79144 | 0.000124 | 0.00417  | 0.003278 |
| Reactome | R-HSA-2500257 | Resolution of Sister Chromatid Cohesion                    | 118 | -0.46316 | -1.78657 | 0.000118 | 0.00417  | 0.003278 |
| Reactome | R-HSA-8953750 | Transcriptional Regulation by E2F6                         | 33  | -0.56537 | -1.7784  | 0.00256  | 0.026207 | 0.020602 |
| Reactome | R-HSA-176187  | Activation of ATR in response to replication stress        | 36  | -0.55306 | -1.76725 | 0.002964 | 0.029003 | 0.0228   |
| Reactome | R-HSA-72187   | mRNA 3'-end processing                                     | 49  | -0.51911 | -1.76277 | 0.001618 | 0.018665 | 0.014673 |
| Reactome | R-HSA-5607763 | CLEC7A (Dectin-1) induces NFAT activation                  | 12  | -0.70843 | -1.76246 | 0.004491 | 0.039843 | 0.031322 |
| Reactome | R-HSA-168253  | Host Interactions with Influenza Factors                   | 41  | -0.53608 | -1.75909 | 0.002915 | 0.028813 | 0.022651 |
| Reactome | R-HSA-5696400 | Dual Incision in GG-NER                                    | 40  | -0.53844 | -1.75769 | 0.002786 | 0.027747 | 0.021812 |
| Reactome | R-HSA-5685942 | HDR through Homologous Recombination (HRR)                 | 64  | -0.49618 | -1.75352 | 0.000523 | 0.008617 | 0.006774 |
| Reactome | R-HSA-5696399 | Global Genome Nucleotide Excision Repair (GG-NER)          | 82  | -0.47542 | -1.75221 | 0.000249 | 0.006725 | 0.005287 |
| Reactome | R-HSA-2470946 | Cohesin Loading onto Chromatin                             | 10  | -0.73814 | -1.74989 | 0.005435 | 0.046545 | 0.036591 |
| Reactome | R-HSA-2173793 | Transcriptional activity of SMAD2/SMAD3:SMAD4 heterotrimer | 44  | -0.52334 | -1.73991 | 0.002479 | 0.025684 | 0.020191 |
| Reactome | R-HSA-2468052 | Establishment of Sister Chromatid Cohesion                 | 11  | -0.71174 | -1.73026 | 0.005729 | 0.048582 | 0.038192 |
| Reactome | R-HSA-5617833 | Cilium Assembly                                            | 191 | -0.42347 | -1.71822 | 0.00011  | 0.00417  | 0.003278 |
| Reactome | R-HSA-72163   | mRNA Splicing - Major Pathway                              | 172 | -0.42634 | -1.7136  | 0.000112 | 0.00417  | 0.003278 |
| Reactome | R-HSA-5633007 | Regulation of TP53 Activity                                | 158 | -0.42828 | -1.70881 | 0.000113 | 0.00417  | 0.003278 |
| Reactome | R-HSA-1169092 | Activation of RAS in B cells                               | 5   | -0.87075 | -1.70533 | 0.003673 | 0.033981 | 0.026713 |
| Reactome | R-HSA-72172   | mRNA Splicing                                              | 180 | -0.42059 | -1.69928 | 0.000223 | 0.006112 | 0.004805 |
| Reactome | R-HSA-68882   | Mitotic Anaphase                                           | 189 | -0.41888 | -1.69839 | 0.00011  | 0.00417  | 0.003278 |
| Reactome | R-HSA-429914  | Deadenylation-dependent mRNA decay                         | 55  | -0.49051 | -1.69263 | 0.002791 | 0.027747 | 0.021812 |
| Reactome | R-HSA-69242   | S Phase                                                    | 157 | -0.42456 | -1.69248 | 0.000113 | 0.00417  | 0.003278 |
| Reactome | R-HSA-8951664 | Neddylation                                                | 225 | -0.41146 | -1.69233 | 0.000108 | 0.00417  | 0.003278 |
| Reactome | R-HSA-5368287 | Mitochondrial translation                                  | 91  | -0.45296 | -1.69194 | 0.000858 | 0.011511 | 0.009049 |
| Reactome | R-HSA-5663220 | RHO GTPases Activate Formins                               | 131 | -0.43323 | -1.69173 | 0.000348 | 0.007423 | 0.005835 |

|          |               |                                                             |     |          |          |          |          |          |
|----------|---------------|-------------------------------------------------------------|-----|----------|----------|----------|----------|----------|
| Reactome | R-HSA-983168  | Antigen processing: Ubiquitination & Proteasome degradation | 295 | -0.40358 | -1.69091 | 0.000105 | 0.00417  | 0.003278 |
| Reactome | R-HSA-2555396 | Mitotic Metaphase and Anaphase                              | 190 | -0.41623 | -1.68869 | 0.000331 | 0.007423 | 0.005835 |
| Reactome | R-HSA-2467813 | Separation of Sister Chromatids                             | 178 | -0.41705 | -1.68352 | 0.000334 | 0.007423 | 0.005835 |
| Reactome | R-HSA-1852241 | Organelle biogenesis and maintenance                        | 282 | -0.40177 | -1.67926 | 0.000106 | 0.00417  | 0.003278 |
| Reactome | R-HSA-162587  | HIV Life Cycle                                              | 142 | -0.42541 | -1.67805 | 0.000344 | 0.007423 | 0.005835 |
| Reactome | R-HSA-9010553 | Regulation of expression of SLITs and ROBOs                 | 148 | -0.41805 | -1.65621 | 0.000342 | 0.007423 | 0.005835 |
| Reactome | R-HSA-5696398 | Nucleotide Excision Repair                                  | 108 | -0.43423 | -1.65611 | 0.000839 | 0.011386 | 0.008951 |
| Reactome | R-HSA-5389840 | Mitochondrial translation elongation                        | 85  | -0.44624 | -1.65152 | 0.001734 | 0.01974  | 0.015518 |
| Reactome | R-HSA-5368286 | Mitochondrial translation initiation                        | 85  | -0.44619 | -1.6513  | 0.001734 | 0.01974  | 0.015518 |
| Reactome | R-HSA-162599  | Late Phase of HIV Life Cycle                                | 129 | -0.42128 | -1.64178 | 0.000699 | 0.010148 | 0.007978 |
| Reactome | R-HSA-5419276 | Mitochondrial translation termination                       | 85  | -0.44169 | -1.63466 | 0.00223  | 0.023667 | 0.018606 |
| Reactome | R-HSA-6807505 | RNA polymerase II transcribes snRNA genes                   | 73  | -0.44752 | -1.61783 | 0.003695 | 0.033999 | 0.026728 |
| Reactome | R-HSA-69620   | Cell Cycle Checkpoints                                      | 271 | -0.38585 | -1.60782 | 0.000106 | 0.00417  | 0.003278 |
| Reactome | R-HSA-983705  | Signaling by the B Cell Receptor (BCR)                      | 108 | -0.42155 | -1.60773 | 0.001798 | 0.020215 | 0.015892 |
| Reactome | R-HSA-380270  | Recruitment of mitotic centrosome proteins and complexes    | 77  | -0.44027 | -1.60651 | 0.003657 | 0.033981 | 0.026713 |
| Reactome | R-HSA-380287  | Centrosome maturation                                       | 77  | -0.44027 | -1.60651 | 0.003657 | 0.033981 | 0.026713 |
| Reactome | R-HSA-69278   | Cell Cycle, Mitotic                                         | 496 | -0.37425 | -1.60587 | 0.000102 | 0.00417  | 0.003278 |
| Reactome | R-HSA-6781827 | Transcription-Coupled Nucleotide Excision Repair (TC-NER)   | 77  | -0.43407 | -1.5839  | 0.005422 | 0.046545 | 0.036591 |
| Reactome | R-HSA-1168372 | Downstream signaling events of B Cell Receptor (BCR)        | 79  | -0.43038 | -1.57552 | 0.005639 | 0.048057 | 0.037779 |
| Reactome | R-HSA-9609507 | Protein localization                                        | 158 | -0.39399 | -1.57201 | 0.001923 | 0.021056 | 0.016553 |
| Reactome | R-HSA-68886   | M Phase                                                     | 356 | -0.36894 | -1.56222 | 0.000104 | 0.00417  | 0.003278 |
| Reactome | R-HSA-69206   | G1/S Transition                                             | 128 | -0.40113 | -1.56116 | 0.002688 | 0.027347 | 0.021498 |
| Reactome | R-HSA-3700989 | Transcriptional Regulation by TP53                          | 353 | -0.36656 | -1.55168 | 0.000208 | 0.005798 | 0.004558 |
| Reactome | R-HSA-5663205 | Infectious disease                                          | 346 | -0.36313 | -1.5365  | 0.000208 | 0.005798 | 0.004558 |
| Reactome | R-HSA-983169  | Class I MHC mediated antigen processing & presentation      | 356 | -0.35832 | -1.51726 | 0.000208 | 0.005798 | 0.004558 |
| Reactome | R-HSA-162906  | HIV Infection                                               | 220 | -0.36609 | -1.50261 | 0.002719 | 0.027347 | 0.021498 |
| Reactome | R-HSA-376176  | Signaling by ROBO receptors                                 | 194 | -0.36839 | -1.49678 | 0.003525 | 0.033146 | 0.026057 |
| Reactome | R-HSA-2990846 | SUMOylation                                                 | 176 | -0.37052 | -1.49365 | 0.004239 | 0.037803 | 0.029718 |
| Reactome | R-HSA-73894   | DNA Repair                                                  | 305 | -0.3416  | -1.43376 | 0.002418 | 0.0252   | 0.01981  |
| Reactome | R-HSA-373076  | Class A/1 (Rhodopsin-like receptors)                        | 311 | 0.239437 | 1.29625  | 0.002169 | 0.023454 | 0.018438 |
| Reactome | R-HSA-500792  | GPCR ligand binding                                         | 432 | 0.253664 | 1.403389 | 0.004098 | 0.037317 | 0.029336 |
| Reactome | R-HSA-375276  | Peptide ligand-binding receptors                            | 186 | 0.280166 | 1.439712 | 0.004086 | 0.037317 | 0.029336 |
| Reactome | R-HSA-112316  | Neuronal System                                             | 396 | 0.262586 | 1.448082 | 0.003378 | 0.032113 | 0.025245 |
| Reactome | R-HSA-202733  | Cell surface interactions at the vascular wall              | 135 | 0.305286 | 1.497273 | 0.002967 | 0.029003 | 0.0228   |
| Reactome | R-HSA-373760  | L1CAM interactions                                          | 112 | 0.318414 | 1.512479 | 0.004881 | 0.042647 | 0.033526 |

|          |               |                                                                                      |     |          |          |          |          |          |
|----------|---------------|--------------------------------------------------------------------------------------|-----|----------|----------|----------|----------|----------|
| Reactome | R-HSA-1474290 | Collagen formation                                                                   | 90  | 0.341079 | 1.553927 | 0.005952 | 0.049988 | 0.039297 |
| Reactome | R-HSA-2559583 | Cellular Senescence                                                                  | 167 | 0.313193 | 1.581437 | 0.001808 | 0.020215 | 0.015892 |
| Reactome | R-HSA-5617472 | Activation of anterior HOX genes in hindbrain development during early embryogenesis | 97  | 0.341351 | 1.581508 | 0.003331 | 0.031842 | 0.025032 |
| Reactome | R-HSA-5619507 | Activation of HOX genes during differentiation                                       | 97  | 0.341351 | 1.581508 | 0.003331 | 0.031842 | 0.025032 |
| Reactome | R-HSA-1296071 | Potassium Channels                                                                   | 96  | 0.347295 | 1.604572 | 0.002211 | 0.023613 | 0.018563 |
| Reactome | R-HSA-1442490 | Collagen degradation                                                                 | 64  | 0.37862  | 1.617088 | 0.005098 | 0.044317 | 0.034839 |
| Reactome | R-HSA-373080  | Class B/2 (Secretin family receptors)                                                | 90  | 0.355642 | 1.620274 | 0.002706 | 0.027347 | 0.021498 |
| Reactome | R-HSA-211945  | Phase I - Functionalization of compounds                                             | 101 | 0.349201 | 1.626361 | 0.001146 | 0.014642 | 0.011511 |
| Reactome | R-HSA-157118  | Signaling by NOTCH                                                                   | 208 | 0.324148 | 1.686697 | 0.00116  | 0.014642 | 0.011511 |
| Reactome | R-HSA-6806667 | Metabolism of fat-soluble vitamins                                                   | 47  | 0.425701 | 1.70347  | 0.002255 | 0.023785 | 0.018698 |
| Reactome | R-HSA-201722  | Formation of the beta-catenin:TCF transactivating complex                            | 67  | 0.398555 | 1.717745 | 0.002195 | 0.023585 | 0.018541 |
| Reactome | R-HSA-174577  | Activation of C3 and C5                                                              | 5   | 0.842474 | 1.717887 | 0.003072 | 0.029859 | 0.023473 |
| Reactome | R-HSA-3928665 | EPH-ephrin mediated repulsion of cells                                               | 50  | 0.425719 | 1.723046 | 0.001949 | 0.021201 | 0.016667 |
| Reactome | R-HSA-2142700 | Synthesis of Lipoxins (LX)                                                           | 6   | 0.800594 | 1.735757 | 0.005886 | 0.049675 | 0.039051 |
| Reactome | R-HSA-977606  | Regulation of Complement cascade                                                     | 42  | 0.445901 | 1.738537 | 0.002504 | 0.025781 | 0.020267 |
| Reactome | R-HSA-166658  | Complement cascade                                                                   | 53  | 0.424109 | 1.74012  | 0.001603 | 0.018614 | 0.014633 |
| Reactome | R-HSA-6805567 | Keratinization                                                                       | 127 | 0.360123 | 1.750328 | 0.000683 | 0.010148 | 0.007978 |
| Reactome | R-HSA-8939236 | RUNX1 regulates transcription of genes involved in differentiation of HSCs           | 102 | 0.37592  | 1.752093 | 0.000577 | 0.008993 | 0.00707  |
| Reactome | R-HSA-397014  | Muscle contraction                                                                   | 205 | 0.338715 | 1.756636 | 0.001157 | 0.014642 | 0.011511 |
| Reactome | R-HSA-6809371 | Formation of the cornified envelope                                                  | 98  | 0.379108 | 1.756718 | 0.000561 | 0.008987 | 0.007065 |
| Reactome | R-HSA-1474228 | Degradation of the extracellular matrix                                              | 138 | 0.3584   | 1.762977 | 0.000762 | 0.010541 | 0.008286 |
| Reactome | R-HSA-76002   | Platelet activation, signaling and aggregation                                       | 253 | 0.333146 | 1.769541 | 0.001565 | 0.018293 | 0.014381 |
| Reactome | R-HSA-437239  | Recycling pathway of L1                                                              | 41  | 0.461716 | 1.789244 | 0.00143  | 0.016946 | 0.013322 |
| Reactome | R-HSA-5602498 | MyD88 deficiency (TLR2/4)                                                            | 10  | 0.699189 | 1.808487 | 0.004618 | 0.040656 | 0.031961 |
| Reactome | R-HSA-1614517 | Sulfide oxidation to sulfate                                                         | 6   | 0.835447 | 1.811322 | 0.001811 | 0.020215 | 0.015892 |
| Reactome | R-HSA-909733  | Interferon alpha/beta signaling                                                      | 67  | 0.42099  | 1.814439 | 0.001317 | 0.015932 | 0.012525 |
| Reactome | R-HSA-5686938 | Regulation of TLR by endogenous ligand                                               | 17  | 0.595598 | 1.817772 | 0.005171 | 0.044733 | 0.035166 |
| Reactome | R-HSA-76005   | Response to elevated platelet cytosolic Ca <sup>2+</sup>                             | 127 | 0.374437 | 1.819902 | 0.000683 | 0.010148 | 0.007978 |
| Reactome | R-HSA-917977  | Transferrin endocytosis and recycling                                                | 31  | 0.508591 | 1.830975 | 0.002292 | 0.024032 | 0.018892 |
| Reactome | R-HSA-2559580 | Oxidative Stress Induced Senescence                                                  | 98  | 0.395316 | 1.831825 | 0.000561 | 0.008987 | 0.007065 |
| Reactome | R-HSA-1482883 | Acyl chain remodeling of DAG and TAG                                                 | 5   | 0.899404 | 1.833974 | 0.000658 | 0.010079 | 0.007923 |
| Reactome | R-HSA-549127  | Organic cation transport                                                             | 8   | 0.765757 | 1.834955 | 0.001882 | 0.020875 | 0.01641  |
| Reactome | R-HSA-177504  | Retrograde neurotrophin signalling                                                   | 14  | 0.638772 | 1.839773 | 0.004176 | 0.037528 | 0.029501 |

|          |               |                                                                                            |     |          |          |          |          |          |
|----------|---------------|--------------------------------------------------------------------------------------------|-----|----------|----------|----------|----------|----------|
| Reactome | R-HSA-5603041 | IRAK4 deficiency (TLR2/4)                                                                  | 11  | 0.691331 | 1.845744 | 0.003196 | 0.030893 | 0.024286 |
| Reactome | R-HSA-445355  | Smooth Muscle Contraction                                                                  | 39  | 0.483353 | 1.848904 | 0.001397 | 0.016669 | 0.013104 |
| Reactome | R-HSA-2559586 | DNA Damage/Telomere Stress Induced Senescence                                              | 63  | 0.435169 | 1.852989 | 0.000842 | 0.011386 | 0.008951 |
| Reactome | R-HSA-8866427 | VLDLR internalisation and degradation                                                      | 12  | 0.678979 | 1.860435 | 0.003509 | 0.033146 | 0.026057 |
| Reactome | R-HSA-5260271 | Diseases of Immune System                                                                  | 24  | 0.552448 | 1.867965 | 0.004187 | 0.037528 | 0.029501 |
| Reactome | R-HSA-5602358 | Diseases associated with the TLR signaling cascade                                         | 24  | 0.552448 | 1.867965 | 0.004187 | 0.037528 | 0.029501 |
| Reactome | R-HSA-448706  | Interleukin-1 processing                                                                   | 8   | 0.779758 | 1.868507 | 0.001176 | 0.014642 | 0.011511 |
| Reactome | R-HSA-2299718 | Condensation of Prophase Chromosomes                                                       | 50  | 0.461768 | 1.86895  | 0.001169 | 0.014642 | 0.011511 |
| Reactome | R-HSA-114608  | Platelet degranulation                                                                     | 122 | 0.38979  | 1.879788 | 0.000665 | 0.010097 | 0.007937 |
| Reactome | R-HSA-975634  | Retinoid metabolism and transport                                                          | 43  | 0.482918 | 1.891096 | 0.000722 | 0.010148 | 0.007978 |
| Reactome | R-HSA-1247673 | Erythrocytes take up oxygen and release carbon dioxide                                     | 7   | 0.829099 | 1.896907 | 0.000463 | 0.008085 | 0.006355 |
| Reactome | R-HSA-140877  | Formation of Fibrin Clot (Clotting Cascade)                                                | 38  | 0.502744 | 1.907565 | 0.001395 | 0.016669 | 0.013104 |
| Reactome | R-HSA-212300  | PRC2 methylates histones and DNA                                                           | 49  | 0.476559 | 1.920087 | 0.000387 | 0.007776 | 0.006113 |
| Reactome | R-HSA-1474244 | Extracellular matrix organization                                                          | 295 | 0.358397 | 1.936725 | 0.001923 | 0.021056 | 0.016553 |
| Reactome | R-HSA-5668599 | RHO GTPases Activate NADPH Oxidases                                                        | 23  | 0.590572 | 1.971645 | 0.001194 | 0.014755 | 0.011599 |
| Reactome | R-HSA-73929   | Base-Excision Repair, AP Site Formation                                                    | 45  | 0.501456 | 1.988196 | 0.000734 | 0.010247 | 0.008056 |
| Reactome | R-HSA-110328  | Recognition and association of DNA glycosylase with site containing an affected pyrimidine | 43  | 0.511674 | 2.003705 | 0.000361 | 0.007423 | 0.005835 |
| Reactome | R-HSA-110329  | Cleavage of the damaged pyrimidine                                                         | 43  | 0.511674 | 2.003705 | 0.000361 | 0.007423 | 0.005835 |
| Reactome | R-HSA-73928   | Depyrimidination                                                                           | 43  | 0.511674 | 2.003705 | 0.000361 | 0.007423 | 0.005835 |
| Reactome | R-HSA-1222556 | ROS and RNS production in phagocytes                                                       | 35  | 0.542756 | 2.01064  | 0.000339 | 0.007423 | 0.005835 |
| Reactome | R-HSA-427359  | SIRT1 negatively regulates rRNA expression                                                 | 44  | 0.515122 | 2.029391 | 0.000365 | 0.007423 | 0.005835 |
| Reactome | R-HSA-912446  | Meiotic recombination                                                                      | 61  | 0.483516 | 2.043471 | 0.000418 | 0.007947 | 0.006247 |
| Reactome | R-HSA-166663  | Initial triggering of complement                                                           | 20  | 0.637494 | 2.04391  | 0.000571 | 0.008987 | 0.007065 |
| Reactome | R-HSA-1912408 | Pre-NOTCH Transcription and Translation                                                    | 68  | 0.473559 | 2.045609 | 0.000443 | 0.007977 | 0.006271 |
| Reactome | R-HSA-1237044 | Erythrocytes take up carbon dioxide and release oxygen                                     | 11  | 0.768152 | 2.050843 | 0.000492 | 0.008423 | 0.006622 |
| Reactome | R-HSA-1480926 | O2/CO2 exchange in erythrocytes                                                            | 11  | 0.768152 | 2.050843 | 0.000492 | 0.008423 | 0.006622 |
| Reactome | R-HSA-1912422 | Pre-NOTCH Expression and Processing                                                        | 84  | 0.457689 | 2.052862 | 0.000516 | 0.008617 | 0.006774 |
| Reactome | R-HSA-3214815 | HDACs deacetylate histones                                                                 | 67  | 0.480177 | 2.069528 | 0.000439 | 0.007977 | 0.006271 |
| Reactome | R-HSA-2559582 | Senescence-Associated Secretory                                                            | 85  | 0.462151 | 2.076639 | 0.000518 | 0.008617 | 0.006774 |

| Phenotype (SASP) |               |                                                                                                 |     |          |          |          |          |          |  |
|------------------|---------------|-------------------------------------------------------------------------------------------------|-----|----------|----------|----------|----------|----------|--|
| Reactome         | R-HSA-1592389 | Activation of Matrix Metalloproteinases                                                         | 31  | 0.585769 | 2.108821 | 0.000655 | 0.010079 | 0.007923 |  |
| Reactome         | R-HSA-427389  | ERCC6 (CSB) and EHMT2 (G9a) positively regulate rRNA expression                                 | 52  | 0.525225 | 2.148394 | 0.000397 | 0.007795 | 0.006128 |  |
| Reactome         | R-HSA-9616222 | Transcriptional regulation of granulopoiesis                                                    | 65  | 0.503675 | 2.15937  | 0.000428 | 0.007947 | 0.006247 |  |
| Reactome         | R-HSA-110330  | Recognition and association of DNA glycosylase with site containing an affected purine          | 39  | 0.57192  | 2.187689 | 0.000349 | 0.007423 | 0.005835 |  |
| Reactome         | R-HSA-110331  | Cleavage of the damaged purine                                                                  | 39  | 0.57192  | 2.187689 | 0.000349 | 0.007423 | 0.005835 |  |
| Reactome         | R-HSA-73927   | Depurination                                                                                    | 39  | 0.57192  | 2.187689 | 0.000349 | 0.007423 | 0.005835 |  |
| Reactome         | R-HSA-171306  | Packaging Of Telomere Ends                                                                      | 35  | 0.592036 | 2.193197 | 0.000339 | 0.007423 | 0.005835 |  |
| Reactome         | R-HSA-8936459 | RUNX1 regulates genes involved in megakaryocyte differentiation and platelet function           | 72  | 0.514486 | 2.25718  | 0.000457 | 0.008064 | 0.00634  |  |
| Reactome         | R-HSA-6803157 | Antimicrobial peptides                                                                          | 65  | 0.541303 | 2.320691 | 0.000428 | 0.007947 | 0.006247 |  |
| Reactome         | R-HSA-5625740 | RHO GTPases activate PKNs                                                                       | 71  | 0.532258 | 2.32466  | 0.000454 | 0.008064 | 0.00634  |  |
| Reactome         | R-HSA-5625886 | Activated PKN1 stimulates transcription of AR (androgen receptor) regulated genes KLK2 and KLK3 | 43  | 0.610762 | 2.391732 | 0.000361 | 0.007423 | 0.005835 |  |
| Reactome         | R-HSA-5334118 | DNA methylation                                                                                 | 41  | 0.63855  | 2.474514 | 0.000358 | 0.007423 | 0.005835 |  |
| Reactome         | R-HSA-73728   | RNA Polymerase I Promoter Opening                                                               | 39  | 0.652007 | 2.494037 | 0.000349 | 0.007423 | 0.005835 |  |
| Reactome         | R-HSA-977225  | Amyloid fiber formation                                                                         | 83  | 0.560545 | 2.511793 | 0.000514 | 0.008617 | 0.006774 |  |
| Reactome         | R-HSA-6798695 | Neutrophil degranulation                                                                        | 456 | 0.498737 | 2.777591 | 0.00463  | 0.040656 | 0.031961 |  |

**Supplementary Table 11.** Detailed results of GSEA for GO-BP, KEGG and Reactome in the COPDGene dataset.

| Source | ID       | Description            | setSize | enrichmentScore | NES      | pvalue   | p.adjust | qvalues  |
|--------|----------|------------------------|---------|-----------------|----------|----------|----------|----------|
| KEGG   | hsa04979 | Cholesterol metabolism | 50      | 0.529643        | 2.026492 | 0.000187 | 0.003278 | 0.002454 |
| KEGG   | hsa05134 | Legionellosis          | 53      | 0.510459        | 1.977749 | 0.000187 | 0.003278 | 0.002454 |
| KEGG   | hsa05144 | Malaria                | 46      | 0.60307         | 2.264855 | 0.000187 | 0.003278 | 0.002454 |

|      |          |                                                            |     |          |          |          |          |          |
|------|----------|------------------------------------------------------------|-----|----------|----------|----------|----------|----------|
| KEGG | hsa04142 | Lysosome                                                   | 123 | 0.414809 | 1.870826 | 0.000188 | 0.003278 | 0.002454 |
| KEGG | hsa05150 | Staphylococcus aureus infection                            | 75  | 0.462193 | 1.917484 | 0.000188 | 0.003278 | 0.002454 |
| KEGG | hsa04145 | Phagosome                                                  | 138 | 0.449557 | 2.062009 | 0.000188 | 0.003278 | 0.002454 |
| KEGG | hsa05323 | Rheumatoid arthritis                                       | 85  | 0.473541 | 2.011097 | 0.000189 | 0.003278 | 0.002454 |
| KEGG | hsa05171 | Coronavirus disease - COVID-19                             | 206 | 0.345188 | 1.674933 | 0.000189 | 0.003278 | 0.002454 |
| KEGG | hsa04610 | Complement and coagulation cascades                        | 81  | 0.478347 | 2.012954 | 0.000189 | 0.003278 | 0.002454 |
| KEGG | hsa04080 | Neuroactive ligand-receptor interaction                    | 327 | 0.397639 | 2.031411 | 0.00019  | 0.003278 | 0.002454 |
| KEGG | hsa05146 | Amoebiasis                                                 | 101 | 0.504002 | 2.20394  | 0.00019  | 0.003278 | 0.002454 |
| KEGG | hsa04974 | Protein digestion and absorption                           | 95  | 0.416681 | 1.804389 | 0.000191 | 0.003278 | 0.002454 |
| KEGG | hsa00970 | Aminoacyl-tRNA biosynthesis                                | 41  | -0.57567 | -2.11918 | 0.00021  | 0.003278 | 0.002454 |
| KEGG | hsa04070 | Phosphatidylinositol signaling system                      | 94  | -0.43113 | -1.87725 | 0.000211 | 0.003278 | 0.002454 |
| KEGG | hsa04660 | T cell receptor signaling pathway                          | 102 | -0.4343  | -1.9178  | 0.000211 | 0.003278 | 0.002454 |
| KEGG | hsa03015 | mRNA surveillance pathway                                  | 84  | -0.48565 | -2.07718 | 0.000211 | 0.003278 | 0.002454 |
| KEGG | hsa03030 | DNA replication                                            | 36  | -0.6473  | -2.30785 | 0.000212 | 0.003278 | 0.002454 |
| KEGG | hsa05340 | Primary immunodeficiency                                   | 36  | -0.57475 | -2.04917 | 0.000212 | 0.003278 | 0.002454 |
| KEGG | hsa04110 | Cell cycle                                                 | 122 | -0.40671 | -1.84412 | 0.000212 | 0.003278 | 0.002454 |
| KEGG | hsa03008 | Ribosome biogenesis in eukaryotes                          | 71  | -0.45374 | -1.87536 | 0.000214 | 0.003278 | 0.002454 |
| KEGG | hsa03040 | Spliceosome                                                | 119 | -0.45344 | -2.04591 | 0.000214 | 0.003278 | 0.002454 |
| KEGG | hsa05168 | Herpes simplex virus 1 infection                           | 445 | -0.52024 | -2.76103 | 0.000215 | 0.003278 | 0.002454 |
| KEGG | hsa05120 | Epithelial cell signaling in Helicobacter pylori infection | 70  | 0.454157 | 1.858905 | 0.000375 | 0.004912 | 0.003678 |
| KEGG | hsa05152 | Tuberculosis                                               | 170 | 0.362043 | 1.716635 | 0.000376 | 0.004912 | 0.003678 |
| KEGG | hsa04020 | Calcium signaling pathway                                  | 235 | 0.326213 | 1.610495 | 0.000378 | 0.004912 | 0.003678 |
| KEGG | hsa04657 | IL-17 signaling pathway                                    | 92  | 0.404932 | 1.744774 | 0.00038  | 0.004912 | 0.003678 |
| KEGG | hsa03430 | Mismatch repair                                            | 22  | -0.64466 | -2.03745 | 0.000425 | 0.00496  | 0.003714 |
| KEGG | hsa03018 | RNA degradation                                            | 76  | -0.42534 | -1.78483 | 0.000427 | 0.00496  | 0.003714 |
| KEGG | hsa03460 | Fanconi anemia pathway                                     | 48  | -0.51289 | -1.94851 | 0.000428 | 0.00496  | 0.003714 |
| KEGG | hsa04742 | Taste transduction                                         | 75  | 0.43619  | 1.809606 | 0.000564 | 0.005954 | 0.004458 |
| KEGG | hsa04740 | Olfactory transduction                                     | 120 | 0.403091 | 1.811668 | 0.000565 | 0.005954 | 0.004458 |
| KEGG | hsa04380 | Osteoclast differentiation                                 | 125 | 0.382713 | 1.729638 | 0.000567 | 0.005954 | 0.004458 |
| KEGG | hsa04950 | Maturity onset diabetes of the young                       | 24  | 0.594662 | 1.908822 | 0.000757 | 0.007705 | 0.005769 |
| KEGG | hsa05133 | Pertussis                                                  | 70  | 0.431926 | 1.767909 | 0.000937 | 0.008864 | 0.006637 |
| KEGG | hsa04060 | Cytokine-cytokine receptor interaction                     | 276 | 0.294759 | 1.480697 | 0.000949 | 0.008864 | 0.006637 |
| KEGG | hsa04966 | Collecting duct acid secretion                             | 27  | 0.579564 | 1.910425 | 0.00095  | 0.008864 | 0.006637 |
| KEGG | hsa03420 | Nucleotide excision repair                                 | 43  | -0.5119  | -1.90667 | 0.001478 | 0.013419 | 0.010048 |
| KEGG | hsa04658 | Th1 and Th2 cell differentiation                           | 88  | -0.38879 | -1.67587 | 0.001687 | 0.014685 | 0.010996 |
| KEGG | hsa04721 | Synaptic vesicle cycle                                     | 77  | 0.408972 | 1.70431  | 0.001705 | 0.014685 | 0.010996 |
| KEGG | hsa05140 | Leishmaniasis                                              | 70  | 0.412353 | 1.687795 | 0.001873 | 0.015224 | 0.011399 |
| KEGG | hsa04659 | Th17 cell differentiation                                  | 102 | -0.36937 | -1.63105 | 0.001901 | 0.015224 | 0.011399 |
| KEGG | hsa05033 | Nicotine addiction                                         | 38  | 0.495557 | 1.774744 | 0.001903 | 0.015224 | 0.011399 |
| KEGG | hsa05204 | Chemical carcinogenesis                                    | 63  | 0.437164 | 1.751844 | 0.002054 | 0.016051 | 0.012018 |

|       |            |                                                     |     |          |          |          |          |          |
|-------|------------|-----------------------------------------------------|-----|----------|----------|----------|----------|----------|
| KEGG  | hsa05202   | Transcriptional misregulation in cancer             | 174 | 0.316016 | 1.50255  | 0.002445 | 0.018674 | 0.013982 |
| KEGG  | hsa00770   | Pantothenate and CoA biosynthesis                   | 21  | 0.588236 | 1.822898 | 0.00321  | 0.023968 | 0.017946 |
| KEGG  | hsa03022   | Basal transcription factors                         | 40  | -0.48485 | -1.77264 | 0.003386 | 0.024729 | 0.018516 |
| KEGG  | hsa04976   | Bile secretion                                      | 76  | 0.391751 | 1.630293 | 0.003573 | 0.025546 | 0.019128 |
| KEGG  | hsa04928   | Parathyroid hormone synthesis, secretion and action | 104 | 0.350657 | 1.543444 | 0.003797 | 0.026576 | 0.019898 |
| KEGG  | hsa04911   | Insulin secretion                                   | 85  | 0.372151 | 1.580499 | 0.00416  | 0.028528 | 0.02136  |
| KEGG  | hsa03013   | RNA transport                                       | 148 | -0.32153 | -1.50276 | 0.00463  | 0.030641 | 0.022942 |
| KEGG  | hsa04621   | NOD-like receptor signaling pathway                 | 167 | 0.310406 | 1.467508 | 0.004711 | 0.030641 | 0.022942 |
| KEGG  | hsa04613   | Neutrophil extracellular trap formation             | 151 | 0.320453 | 1.48953  | 0.004742 | 0.030641 | 0.022942 |
| KEGG  | hsa04640   | Hematopoietic cell lineage                          | 92  | -0.36015 | -1.56238 | 0.005485 | 0.033957 | 0.025425 |
| KEGG  | hsa03320   | PPAR signaling pathway                              | 72  | 0.384333 | 1.582608 | 0.005602 | 0.033957 | 0.025425 |
| KEGG  | hsa05143   | African trypanosomiasis                             | 34  | 0.488583 | 1.711288 | 0.005641 | 0.033957 | 0.025425 |
| KEGG  | hsa04120   | Ubiquitin mediated proteolysis                      | 135 | -0.32799 | -1.51051 | 0.005742 | 0.033957 | 0.025425 |
| KEGG  | hsa03410   | Base excision repair                                | 32  | -0.49618 | -1.71907 | 0.005761 | 0.033957 | 0.025425 |
| KEGG  | hsa04978   | Mineral absorption                                  | 57  | 0.414663 | 1.626735 | 0.006017 | 0.034859 | 0.0261   |
| KEGG  | hsa04921   | Oxytocin signaling pathway                          | 146 | 0.315899 | 1.457534 | 0.006496 | 0.036994 | 0.027699 |
| KEGG  | hsa05219   | Bladder cancer                                      | 41  | 0.451515 | 1.647708 | 0.008197 | 0.045324 | 0.033936 |
| KEGG  | hsa04141   | Protein processing in endoplasmic reticulum         | 164 | -0.30687 | -1.45255 | 0.008301 | 0.045324 | 0.033936 |
| KEGG  | hsa05032   | Morphine addiction                                  | 88  | 0.354453 | 1.514341 | 0.008363 | 0.045324 | 0.033936 |
| GO-BP | GO:0043312 | neutrophil degranulation                            | 464 | 0.448378 | 2.378848 | 0.000187 | 0.004738 | 0.003574 |
| GO-BP | GO:0031667 | response to nutrient levels                         | 475 | 0.282893 | 1.504065 | 0.000187 | 0.004738 | 0.003574 |
| GO-BP | GO:0002446 | neutrophil mediated immunity                        | 478 | 0.442863 | 2.356628 | 0.000187 | 0.004738 | 0.003574 |
| GO-BP | GO:0042119 | neutrophil activation                               | 477 | 0.451692 | 2.403062 | 0.000187 | 0.004738 | 0.003574 |
| GO-BP | GO:0002283 | neutrophil activation involved in immune response   | 467 | 0.448289 | 2.379314 | 0.000187 | 0.004738 | 0.003574 |
| GO-BP | GO:0036230 | granulocyte activation                              | 482 | 0.446529 | 2.377123 | 0.000187 | 0.004738 | 0.003574 |
| GO-BP | GO:0030335 | positive regulation of cell migration               | 484 | 0.292198 | 1.556713 | 0.000187 | 0.004738 | 0.003574 |
| GO-BP | GO:1901652 | response to peptide                                 | 493 | 0.328524 | 1.753573 | 0.000187 | 0.004738 | 0.003574 |
| GO-BP | GO:0009636 | response to toxic substance                         | 494 | 0.298921 | 1.595794 | 0.000187 | 0.004738 | 0.003574 |
| GO-BP | GO:0007389 | pattern specification process                       | 426 | 0.302549 | 1.592018 | 0.000187 | 0.004738 | 0.003574 |
| GO-BP | GO:0043434 | response to peptide hormone                         | 419 | 0.322991 | 1.696465 | 0.000187 | 0.004738 | 0.003574 |
| GO-BP | GO:0048871 | multicellular organismal homeostasis                | 465 | 0.284328 | 1.508152 | 0.000187 | 0.004738 | 0.003574 |
| GO-BP | GO:0048732 | gland development                                   | 417 | 0.312803 | 1.642127 | 0.000187 | 0.004738 | 0.003574 |
| GO-BP | GO:0050804 | modulation of chemical synaptic transmission        | 424 | 0.336815 | 1.770951 | 0.000187 | 0.004738 | 0.003574 |
| GO-BP | GO:0099177 | regulation of trans-synaptic signaling              | 425 | 0.336185 | 1.768409 | 0.000188 | 0.004738 | 0.003574 |
| GO-BP | GO:0002791 | regulation of peptide secretion                     | 468 | 0.29569  | 1.569218 | 0.000188 | 0.004738 | 0.003574 |
| GO-BP | GO:0048568 | embryonic organ development                         | 416 | 0.301318 | 1.581413 | 0.000188 | 0.004738 | 0.003574 |
| GO-BP | GO:0003012 | muscle system process                               | 423 | 0.324704 | 1.706806 | 0.000188 | 0.004738 | 0.003574 |
| GO-BP | GO:0001525 | angiogenesis                                        | 479 | 0.319981 | 1.701666 | 0.000188 | 0.004738 | 0.003574 |



|       |            |                                                                      |     |          |          |          |          |          |
|-------|------------|----------------------------------------------------------------------|-----|----------|----------|----------|----------|----------|
| GO-BP | GO:0043410 | positive regulation of MAPK cascade                                  | 500 | 0.314962 | 1.68198  | 0.000188 | 0.004738 | 0.003574 |
| GO-BP | GO:0051051 | negative regulation of transport                                     | 457 | 0.319949 | 1.694754 | 0.000188 | 0.004738 | 0.003574 |
| GO-BP | GO:0019932 | second-messenger-mediated signaling                                  | 420 | 0.317936 | 1.669832 | 0.000188 | 0.004738 | 0.003574 |
| GO-BP | GO:0061458 | reproductive system development                                      | 414 | 0.308639 | 1.618983 | 0.000188 | 0.004738 | 0.003574 |
| GO-BP | GO:0001819 | positive regulation of cytokine production                           | 432 | 0.305638 | 1.609288 | 0.000188 | 0.004738 | 0.003574 |
| GO-BP | GO:0015711 | organic anion transport                                              | 455 | 0.28489  | 1.507913 | 0.000188 | 0.004738 | 0.003574 |
| GO-BP | GO:0034765 | regulation of ion transmembrane transport                            | 455 | 0.337727 | 1.787579 | 0.000188 | 0.004738 | 0.003574 |
| GO-BP | GO:0042391 | regulation of membrane potential                                     | 407 | 0.378777 | 1.982963 | 0.000188 | 0.004738 | 0.003574 |
| GO-BP | GO:0052547 | regulation of peptidase activity                                     | 407 | 0.310978 | 1.628021 | 0.000188 | 0.004738 | 0.003574 |
| GO-BP | GO:0015672 | monovalent inorganic cation transport                                | 489 | 0.342078 | 1.823127 | 0.000188 | 0.004738 | 0.003574 |
| GO-BP | GO:0042445 | hormone metabolic process                                            | 217 | 0.417672 | 2.039681 | 0.000188 | 0.004738 | 0.003574 |
| GO-BP | GO:0042742 | defense response to bacterium                                        | 217 | 0.382901 | 1.869875 | 0.000188 | 0.004738 | 0.003574 |
| GO-BP | GO:0051047 | positive regulation of secretion                                     | 410 | 0.356205 | 1.866655 | 0.000188 | 0.004738 | 0.003574 |
| GO-BP | GO:0010951 | negative regulation of endopeptidase activity                        | 220 | 0.380743 | 1.863406 | 0.000188 | 0.004738 | 0.003574 |
| GO-BP | GO:0048608 | reproductive structure development                                   | 411 | 0.30922  | 1.620668 | 0.000188 | 0.004738 | 0.003574 |
| GO-BP | GO:0050708 | regulation of protein secretion                                      | 441 | 0.294921 | 1.556267 | 0.000188 | 0.004738 | 0.003574 |
| GO-BP | GO:0032494 | response to peptidoglycan                                            | 10  | 0.884747 | 2.1969   | 0.000188 | 0.004738 | 0.003574 |
| GO-BP | GO:0051924 | regulation of calcium ion transport                                  | 241 | 0.327734 | 1.619593 | 0.000188 | 0.004738 | 0.003574 |
| GO-BP | GO:0006813 | potassium ion transport                                              | 221 | 0.364933 | 1.787572 | 0.000188 | 0.004738 | 0.003574 |
| GO-BP | GO:0009743 | response to carbohydrate                                             | 221 | 0.337632 | 1.65384  | 0.000188 | 0.004738 | 0.003574 |
| GO-BP | GO:0090324 | negative regulation of oxidative phosphorylation                     | 7   | 0.84294  | 1.867844 | 0.000188 | 0.004738 | 0.003574 |
| GO-BP | GO:0098742 | cell-cell adhesion via plasma-membrane adhesion molecules            | 243 | 0.345973 | 1.711782 | 0.000188 | 0.004738 | 0.003574 |
| GO-BP | GO:0071216 | cellular response to biotic stimulus                                 | 216 | 0.373539 | 1.822945 | 0.000188 | 0.004738 | 0.003574 |
| GO-BP | GO:0043062 | extracellular structure organization                                 | 403 | 0.38052  | 1.989552 | 0.000188 | 0.004738 | 0.003574 |
| GO-BP | GO:0044706 | multi-multicellular organism process                                 | 214 | 0.37035  | 1.805221 | 0.000188 | 0.004738 | 0.003574 |
| GO-BP | GO:0023061 | signal release                                                       | 451 | 0.36601  | 1.934872 | 0.000189 | 0.004738 | 0.003574 |
| GO-BP | GO:0010466 | negative regulation of peptidase activity                            | 230 | 0.378877 | 1.861112 | 0.000189 | 0.004738 | 0.003574 |
| GO-BP | GO:0050706 | regulation of interleukin-1 beta secretion                           | 39  | 0.571257 | 2.06222  | 0.000189 | 0.004738 | 0.003574 |
| GO-BP | GO:0071224 | cellular response to peptidoglycan                                   | 5   | 0.965476 | 1.912723 | 0.000189 | 0.004738 | 0.003574 |
| GO-BP | GO:0001763 | morphogenesis of a branching structure                               | 191 | 0.403133 | 1.933796 | 0.000189 | 0.004738 | 0.003574 |
| GO-BP | GO:0002573 | myeloid leukocyte differentiation                                    | 195 | 0.366592 | 1.763096 | 0.000189 | 0.004738 | 0.003574 |
| GO-BP | GO:0007584 | response to nutrient                                                 | 211 | 0.337736 | 1.641984 | 0.000189 | 0.004738 | 0.003574 |
| GO-BP | GO:0010575 | positive regulation of vascular endothelial growth factor production | 28  | 0.643147 | 2.133323 | 0.000189 | 0.004738 | 0.003574 |
| GO-BP | GO:0017157 | regulation of exocytosis                                             | 211 | 0.339245 | 1.64932  | 0.000189 | 0.004738 | 0.003574 |

|       |            |                                                                                             |     |          |          |          |          |          |
|-------|------------|---------------------------------------------------------------------------------------------|-----|----------|----------|----------|----------|----------|
| GO-BP | GO:0042730 | fibrinolysis                                                                                | 28  | 0.618759 | 2.052428 | 0.000189 | 0.004738 | 0.003574 |
| GO-BP | GO:0042744 | hydrogen peroxide catabolic process                                                         | 28  | 0.68641  | 2.276826 | 0.000189 | 0.004738 | 0.003574 |
| GO-BP | GO:0045980 | negative regulation of nucleotide metabolic process                                         | 28  | 0.672434 | 2.230467 | 0.000189 | 0.004738 | 0.003574 |
| GO-BP | GO:1903532 | positive regulation of secretion by cell                                                    | 383 | 0.360915 | 1.877888 | 0.000189 | 0.004738 | 0.003574 |
| GO-BP | GO:0007187 | G protein-coupled receptor signaling pathway, coupled to cyclic nucleotide second messenger | 233 | 0.414012 | 2.035828 | 0.000189 | 0.004738 | 0.003574 |
| GO-BP | GO:0008016 | regulation of heart contraction                                                             | 233 | 0.344703 | 1.695013 | 0.000189 | 0.004738 | 0.003574 |
| GO-BP | GO:0019935 | cyclic-nucleotide-mediated signaling                                                        | 203 | 0.367124 | 1.77672  | 0.000189 | 0.004738 | 0.003574 |
| GO-BP | GO:0030099 | myeloid cell differentiation                                                                | 386 | 0.310015 | 1.614234 | 0.000189 | 0.004738 | 0.003574 |
| GO-BP | GO:0070374 | positive regulation of ERK1 and ERK2 cascade                                                | 190 | 0.366086 | 1.754773 | 0.000189 | 0.004738 | 0.003574 |
| GO-BP | GO:0015850 | organic hydroxy compound transport                                                          | 231 | 0.35866  | 1.761702 | 0.000189 | 0.004738 | 0.003574 |
| GO-BP | GO:0050953 | sensory perception of light stimulus                                                        | 212 | 0.334905 | 1.629029 | 0.000189 | 0.004738 | 0.003574 |
| GO-BP | GO:0050716 | positive regulation of interleukin-1 secretion                                              | 33  | 0.602029 | 2.090574 | 0.000189 | 0.004738 | 0.003574 |
| GO-BP | GO:0015893 | drug transport                                                                              | 200 | 0.385756 | 1.862301 | 0.000189 | 0.004738 | 0.003574 |
| GO-BP | GO:0050718 | positive regulation of interleukin-1 beta secretion                                         | 29  | 0.656142 | 2.196483 | 0.000189 | 0.004738 | 0.003574 |
| GO-BP | GO:0060541 | respiratory system development                                                              | 194 | 0.358975 | 1.724149 | 0.000189 | 0.004738 | 0.003574 |
| GO-BP | GO:0097529 | myeloid leukocyte migration                                                                 | 194 | 0.366126 | 1.758495 | 0.000189 | 0.004738 | 0.003574 |
| GO-BP | GO:0030595 | leukocyte chemotaxis                                                                        | 205 | 0.346553 | 1.678763 | 0.000189 | 0.004738 | 0.003574 |
| GO-BP | GO:0045745 | positive regulation of G protein-coupled receptor signaling pathway                         | 32  | 0.619384 | 2.132343 | 0.000189 | 0.004738 | 0.003574 |
| GO-BP | GO:0046879 | hormone secretion                                                                           | 306 | 0.35316  | 1.792689 | 0.000189 | 0.004738 | 0.003574 |
| GO-BP | GO:0050890 | cognition                                                                                   | 286 | 0.323067 | 1.629003 | 0.000189 | 0.004738 | 0.003574 |
| GO-BP | GO:2001057 | reactive nitrogen species metabolic process                                                 | 72  | 0.514188 | 2.114019 | 0.000189 | 0.004738 | 0.003574 |
| GO-BP | GO:0022617 | extracellular matrix disassembly                                                            | 75  | 0.484704 | 2.007145 | 0.000189 | 0.004738 | 0.003574 |
| GO-BP | GO:0031016 | pancreas development                                                                        | 75  | 0.453634 | 1.878484 | 0.000189 | 0.004738 | 0.003574 |
| GO-BP | GO:0042310 | vasoconstriction                                                                            | 75  | 0.515704 | 2.135514 | 0.000189 | 0.004738 | 0.003574 |
| GO-BP | GO:0046889 | positive regulation of lipid biosynthetic process                                           | 75  | 0.462051 | 1.91334  | 0.000189 | 0.004738 | 0.003574 |
| GO-BP | GO:0055013 | cardiac muscle cell development                                                             | 75  | 0.477266 | 1.976343 | 0.000189 | 0.004738 | 0.003574 |
| GO-BP | GO:0071219 | cellular response to molecule of bacterial origin                                           | 192 | 0.391376 | 1.877614 | 0.000189 | 0.004738 | 0.003574 |
| GO-BP | GO:1904407 | positive regulation of nitric oxide metabolic process                                       | 38  | 0.575288 | 2.063973 | 0.000189 | 0.004738 | 0.003574 |
| GO-BP | GO:0006959 | humoral immune response                                                                     | 238 | 0.32463  | 1.600404 | 0.000189 | 0.004738 | 0.003574 |
| GO-BP | GO:0003207 | cardiac chamber formation                                                                   | 12  | 0.77626  | 2.03637  | 0.000189 | 0.004738 | 0.003574 |
| GO-BP | GO:0060670 | branching involved in labyrinthine layer morphogenesis                                      | 12  | 0.850678 | 2.231593 | 0.000189 | 0.004738 | 0.003574 |

|       |            |                                                                           |     |          |          |          |          |          |
|-------|------------|---------------------------------------------------------------------------|-----|----------|----------|----------|----------|----------|
| GO-BP | GO:0071404 | cellular response to low-density lipoprotein particle stimulus            | 18  | 0.688558 | 2.035441 | 0.000189 | 0.004738 | 0.003574 |
| GO-BP | GO:0098581 | detection of external biotic stimulus                                     | 18  | 0.715598 | 2.115374 | 0.000189 | 0.004738 | 0.003574 |
| GO-BP | GO:0001667 | ameboidal-type cell migration                                             | 380 | 0.306933 | 1.595743 | 0.000189 | 0.004738 | 0.003574 |
| GO-BP | GO:0032651 | regulation of interleukin-1 beta production                               | 73  | 0.499604 | 2.058729 | 0.000189 | 0.004738 | 0.003574 |
| GO-BP | GO:0052548 | regulation of endopeptidase activity                                      | 380 | 0.313027 | 1.627426 | 0.000189 | 0.004738 | 0.003574 |
| GO-BP | GO:0060841 | venous blood vessel development                                           | 15  | 0.708247 | 1.990788 | 0.000189 | 0.004738 | 0.003574 |
| GO-BP | GO:0007601 | visual perception                                                         | 208 | 0.338233 | 1.640169 | 0.000189 | 0.004738 | 0.003574 |
| GO-BP | GO:0099643 | signal release from synapse                                               | 164 | 0.385124 | 1.810066 | 0.000189 | 0.004738 | 0.003574 |
| GO-BP | GO:1900543 | negative regulation of purine nucleotide metabolic process                | 27  | 0.640368 | 2.103931 | 0.00019  | 0.004738 | 0.003574 |
| GO-BP | GO:0007606 | sensory perception of chemical stimulus                                   | 167 | 0.45299  | 2.13241  | 0.00019  | 0.004738 | 0.003574 |
| GO-BP | GO:0090276 | regulation of peptide hormone secretion                                   | 206 | 0.344887 | 1.671165 | 0.00019  | 0.004738 | 0.003574 |
| GO-BP | GO:0007188 | adenylate cyclase-modulating G protein-coupled receptor signaling pathway | 207 | 0.412948 | 2.001205 | 0.00019  | 0.004738 | 0.003574 |
| GO-BP | GO:0030324 | lung development                                                          | 168 | 0.380511 | 1.79278  | 0.00019  | 0.004738 | 0.003574 |
| GO-BP | GO:0042116 | macrophage activation                                                     | 83  | 0.471278 | 1.986217 | 0.00019  | 0.004738 | 0.003574 |
| GO-BP | GO:0055001 | muscle cell development                                                   | 168 | 0.44409  | 2.092334 | 0.00019  | 0.004738 | 0.003574 |
| GO-BP | GO:0003018 | vascular process in circulatory system                                    | 166 | 0.431875 | 2.031741 | 0.00019  | 0.004738 | 0.003574 |
| GO-BP | GO:0030072 | peptide hormone secretion                                                 | 246 | 0.343515 | 1.699581 | 0.00019  | 0.004738 | 0.003574 |
| GO-BP | GO:0032642 | regulation of chemokine production                                        | 77  | 0.472356 | 1.96446  | 0.00019  | 0.004738 | 0.003574 |
| GO-BP | GO:0048469 | cell maturation                                                           | 166 | 0.389605 | 1.832883 | 0.00019  | 0.004738 | 0.003574 |
| GO-BP | GO:0060537 | muscle tissue development                                                 | 376 | 0.31374  | 1.629182 | 0.00019  | 0.004738 | 0.003574 |
| GO-BP | GO:0035249 | synaptic transmission, glutamatergic                                      | 91  | 0.46252  | 1.981245 | 0.00019  | 0.004738 | 0.003574 |
| GO-BP | GO:0042136 | neurotransmitter biosynthetic process                                     | 91  | 0.466253 | 1.997234 | 0.00019  | 0.004738 | 0.003574 |
| GO-BP | GO:0007611 | learning or memory                                                        | 249 | 0.361216 | 1.790993 | 0.00019  | 0.004738 | 0.003574 |
| GO-BP | GO:0070371 | ERK1 and ERK2 cascade                                                     | 282 | 0.363734 | 1.830627 | 0.00019  | 0.004738 | 0.003574 |
| GO-BP | GO:0090130 | tissue migration                                                          | 282 | 0.325526 | 1.63833  | 0.00019  | 0.004738 | 0.003574 |
| GO-BP | GO:0003015 | heart process                                                             | 270 | 0.357446 | 1.789559 | 0.00019  | 0.004738 | 0.003574 |
| GO-BP | GO:0021700 | developmental maturation                                                  | 270 | 0.316835 | 1.58624  | 0.00019  | 0.004738 | 0.003574 |
| GO-BP | GO:1901342 | regulation of vasculature development                                     | 309 | 0.31844  | 1.617966 | 0.00019  | 0.004738 | 0.003574 |
| GO-BP | GO:0006836 | neurotransmitter transport                                                | 261 | 0.384414 | 1.916931 | 0.00019  | 0.004738 | 0.003574 |
| GO-BP | GO:0060047 | heart contraction                                                         | 261 | 0.354684 | 1.768682 | 0.00019  | 0.004738 | 0.003574 |
| GO-BP | GO:0070372 | regulation of ERK1 and ERK2 cascade                                       | 266 | 0.369232 | 1.844357 | 0.00019  | 0.004738 | 0.003574 |
| GO-BP | GO:1903579 | negative regulation of ATP metabolic process                              | 25  | 0.648771 | 2.086365 | 0.00019  | 0.004738 | 0.003574 |
| GO-BP | GO:0006898 | receptor-mediated endocytosis                                             | 247 | 0.383667 | 1.899366 | 0.00019  | 0.004738 | 0.003574 |
| GO-BP | GO:0016079 | synaptic vesicle exocytosis                                               | 114 | 0.405281 | 1.809237 | 0.00019  | 0.004738 | 0.003574 |
| GO-BP | GO:0032496 | response to lipopolysaccharide                                            | 308 | 0.373297 | 1.895875 | 0.00019  | 0.004738 | 0.003574 |

|       |            |                                                                           |     |          |          |         |          |          |
|-------|------------|---------------------------------------------------------------------------|-----|----------|----------|---------|----------|----------|
| GO-BP | GO:0048167 | regulation of synaptic plasticity                                         | 181 | 0.381185 | 1.814345 | 0.00019 | 0.004738 | 0.003574 |
| GO-BP | GO:0071804 | cellular potassium ion transport                                          | 198 | 0.380344 | 1.83158  | 0.00019 | 0.004738 | 0.003574 |
| GO-BP | GO:0071805 | potassium ion transmembrane transport                                     | 198 | 0.380344 | 1.83158  | 0.00019 | 0.004738 | 0.003574 |
| GO-BP | GO:0008217 | regulation of blood pressure                                              | 175 | 0.399877 | 1.894388 | 0.00019 | 0.004738 | 0.003574 |
| GO-BP | GO:0019933 | cAMP-mediated signaling                                                   | 175 | 0.380291 | 1.801601 | 0.00019 | 0.004738 | 0.003574 |
| GO-BP | GO:0046883 | regulation of hormone secretion                                           | 262 | 0.349821 | 1.745313 | 0.00019 | 0.004738 | 0.003574 |
| GO-BP | GO:0050906 | detection of stimulus involved in sensory perception                      | 176 | 0.391085 | 1.854259 | 0.00019 | 0.004738 | 0.003574 |
| GO-BP | GO:0051146 | striated muscle cell differentiation                                      | 262 | 0.339844 | 1.695538 | 0.00019 | 0.004738 | 0.003574 |
| GO-BP | GO:0006941 | striated muscle contraction                                               | 163 | 0.368334 | 1.729508 | 0.00019 | 0.004738 | 0.003574 |
| GO-BP | GO:0007269 | neurotransmitter secretion                                                | 163 | 0.38548  | 1.810017 | 0.00019 | 0.004738 | 0.003574 |
| GO-BP | GO:0050673 | epithelial cell proliferation                                             | 375 | 0.315827 | 1.638735 | 0.00019 | 0.004738 | 0.003574 |
| GO-BP | GO:0050806 | positive regulation of synaptic transmission                              | 163 | 0.381271 | 1.790256 | 0.00019 | 0.004738 | 0.003574 |
| GO-BP | GO:0055006 | cardiac cell development                                                  | 80  | 0.461412 | 1.933236 | 0.00019 | 0.004738 | 0.003574 |
| GO-BP | GO:0071466 | cellular response to xenobiotic stimulus                                  | 163 | 0.386251 | 1.813636 | 0.00019 | 0.004738 | 0.003574 |
| GO-BP | GO:0006909 | phagocytosis                                                              | 254 | 0.349066 | 1.734668 | 0.00019 | 0.004738 | 0.003574 |
| GO-BP | GO:0009410 | response to xenobiotic stimulus                                           | 268 | 0.34487  | 1.723897 | 0.00019 | 0.004738 | 0.003574 |
| GO-BP | GO:0032963 | collagen metabolic process                                                | 103 | 0.456931 | 2.001356 | 0.00019 | 0.004738 | 0.003574 |
| GO-BP | GO:0045165 | cell fate commitment                                                      | 254 | 0.338758 | 1.683443 | 0.00019 | 0.004738 | 0.003574 |
| GO-BP | GO:0050714 | positive regulation of protein secretion                                  | 254 | 0.346923 | 1.724019 | 0.00019 | 0.004738 | 0.003574 |
| GO-BP | GO:0099565 | chemical synaptic transmission, postsynaptic                              | 103 | 0.464484 | 2.034438 | 0.00019 | 0.004738 | 0.003574 |
| GO-BP | GO:1903409 | reactive oxygen species biosynthetic process                              | 103 | 0.427446 | 1.872213 | 0.00019 | 0.004738 | 0.003574 |
| GO-BP | GO:0030323 | respiratory tube development                                              | 172 | 0.371956 | 1.756417 | 0.00019 | 0.004738 | 0.003574 |
| GO-BP | GO:0007193 | adenylate cyclase-inhibiting G protein-coupled receptor signaling pathway | 79  | 0.459132 | 1.919176 | 0.00019 | 0.004738 | 0.003574 |
| GO-BP | GO:0050907 | detection of chemical stimulus involved in sensory perception             | 122 | 0.482989 | 2.175126 | 0.00019 | 0.004738 | 0.003574 |
| GO-BP | GO:0014706 | striated muscle tissue development                                        | 360 | 0.310348 | 1.603009 | 0.00019 | 0.004738 | 0.003574 |
| GO-BP | GO:0051591 | response to cAMP                                                          | 93  | 0.464872 | 1.997886 | 0.00019 | 0.004738 | 0.003574 |
| GO-BP | GO:0032612 | interleukin-1 production                                                  | 97  | 0.49613  | 2.150145 | 0.00019 | 0.004738 | 0.003574 |
| GO-BP | GO:0045765 | regulation of angiogenesis                                                | 278 | 0.334447 | 1.680681 | 0.00019 | 0.004738 | 0.003574 |
| GO-BP | GO:1903522 | regulation of blood circulation                                           | 278 | 0.377417 | 1.896615 | 0.00019 | 0.004738 | 0.003574 |
| GO-BP | GO:0007215 | glutamate receptor signaling pathway                                      | 98  | 0.445624 | 1.935221 | 0.00019 | 0.004738 | 0.003574 |
| GO-BP | GO:0030100 | regulation of endocytosis                                                 | 260 | 0.374568 | 1.86583  | 0.00019 | 0.004738 | 0.003574 |
| GO-BP | GO:0032602 | chemokine production                                                      | 84  | 0.450079 | 1.898786 | 0.00019 | 0.004738 | 0.003574 |
| GO-BP | GO:0032611 | interleukin-1 beta production                                             | 84  | 0.499123 | 2.105693 | 0.00019 | 0.004738 | 0.003574 |
| GO-BP | GO:0046427 | positive regulation of JAK-STAT                                           | 84  | 0.455315 | 1.920876 | 0.00019 | 0.004738 | 0.003574 |

|       |            |                                                                              |     |          |          |          |          |          |
|-------|------------|------------------------------------------------------------------------------|-----|----------|----------|----------|----------|----------|
|       |            | cascade                                                                      |     |          |          |          |          |          |
| GO-BP | GO:0048663 | neuron fate commitment                                                       | 63  | 0.536977 | 2.145886 | 0.00019  | 0.004738 | 0.003574 |
| GO-BP | GO:0050766 | positive regulation of phagocytosis                                          | 63  | 0.496651 | 1.984734 | 0.00019  | 0.004738 | 0.003574 |
| GO-BP | GO:0050911 | detection of chemical stimulus<br>involved in sensory perception of<br>smell | 84  | 0.465293 | 1.962968 | 0.00019  | 0.004738 | 0.003574 |
| GO-BP | GO:0060079 | excitatory postsynaptic potential                                            | 95  | 0.45444  | 1.962216 | 0.000191 | 0.004738 | 0.003574 |
| GO-BP | GO:0098739 | import across plasma membrane                                                | 104 | 0.417313 | 1.831449 | 0.000191 | 0.004738 | 0.003574 |
| GO-BP | GO:1904018 | positive regulation of vasculature<br>development                            | 179 | 0.375335 | 1.782196 | 0.000191 | 0.004738 | 0.003574 |
| GO-BP | GO:0032755 | positive regulation of interleukin-6<br>production                           | 89  | 0.469838 | 2.003983 | 0.000191 | 0.004738 | 0.003574 |
| GO-BP | GO:0061138 | morphogenesis of a branching<br>epithelium                                   | 178 | 0.40257  | 1.910332 | 0.000191 | 0.004738 | 0.003574 |
| GO-BP | GO:0007608 | sensory perception of smell                                                  | 107 | 0.449966 | 1.984998 | 0.000191 | 0.004738 | 0.003574 |
| GO-BP | GO:1904062 | regulation of cation transmembrane<br>transport                              | 322 | 0.330481 | 1.68558  | 0.000191 | 0.004738 | 0.003574 |
| GO-BP | GO:2000377 | regulation of reactive oxygen species<br>metabolic process                   | 174 | 0.417356 | 1.973646 | 0.000191 | 0.004738 | 0.003574 |
| GO-BP | GO:2000379 | positive regulation of reactive oxygen<br>species metabolic process          | 92  | 0.534274 | 2.289955 | 0.000191 | 0.004738 | 0.003574 |
| GO-BP | GO:0032732 | positive regulation of interleukin-1<br>production                           | 53  | 0.527938 | 2.034246 | 0.000191 | 0.004738 | 0.003574 |
| GO-BP | GO:0046209 | nitric oxide metabolic process                                               | 69  | 0.501199 | 2.038426 | 0.000191 | 0.004738 | 0.003574 |
| GO-BP | GO:0050701 | interleukin-1 secretion                                                      | 53  | 0.552301 | 2.128122 | 0.000191 | 0.004738 | 0.003574 |
| GO-BP | GO:0050727 | regulation of inflammatory response                                          | 362 | 0.346634 | 1.79093  | 0.000191 | 0.004738 | 0.003574 |
| GO-BP | GO:0015849 | organic acid transport                                                       | 314 | 0.328172 | 1.668613 | 0.000191 | 0.004738 | 0.003574 |
| GO-BP | GO:0017001 | antibiotic catabolic process                                                 | 52  | 0.584314 | 2.242452 | 0.000191 | 0.004738 | 0.003574 |
| GO-BP | GO:0042743 | hydrogen peroxide metabolic process                                          | 52  | 0.600643 | 2.305118 | 0.000191 | 0.004738 | 0.003574 |
| GO-BP | GO:0046942 | carboxylic acid transport                                                    | 314 | 0.328172 | 1.668613 | 0.000191 | 0.004738 | 0.003574 |
| GO-BP | GO:0006026 | aminoglycan catabolic process                                                | 64  | 0.489238 | 1.962155 | 0.000191 | 0.004738 | 0.003574 |
| GO-BP | GO:0006809 | nitric oxide biosynthetic process                                            | 64  | 0.480711 | 1.927956 | 0.000191 | 0.004738 | 0.003574 |
| GO-BP | GO:0032652 | regulation of interleukin-1 production                                       | 85  | 0.498503 | 2.10732  | 0.000191 | 0.004738 | 0.003574 |
| GO-BP | GO:0032731 | positive regulation of interleukin-1<br>beta production                      | 47  | 0.554932 | 2.084977 | 0.000191 | 0.004738 | 0.003574 |
| GO-BP | GO:1901653 | cellular response to peptide                                                 | 365 | 0.315842 | 1.632685 | 0.000191 | 0.004738 | 0.003574 |
| GO-BP | GO:0002237 | response to molecule of bacterial<br>origin                                  | 319 | 0.360663 | 1.836909 | 0.000191 | 0.004738 | 0.003574 |
| GO-BP | GO:0006953 | acute-phase response                                                         | 42  | 0.571029 | 2.09333  | 0.000191 | 0.004738 | 0.003574 |
| GO-BP | GO:0032103 | positive regulation of response to<br>external stimulus                      | 296 | 0.393572 | 1.987989 | 0.000191 | 0.004738 | 0.003574 |
| GO-BP | GO:0034754 | cellular hormone metabolic process                                           | 116 | 0.409663 | 1.830781 | 0.000191 | 0.004738 | 0.003574 |
| GO-BP | GO:0050678 | regulation of epithelial cell<br>proliferation                               | 319 | 0.308515 | 1.571315 | 0.000191 | 0.004738 | 0.003574 |

|       |            |                                                         |     |          |          |          |          |          |
|-------|------------|---------------------------------------------------------|-----|----------|----------|----------|----------|----------|
| GO-BP | GO:0072593 | reactive oxygen species metabolic process               | 256 | 0.441992 | 2.197903 | 0.000191 | 0.004738 | 0.003574 |
| GO-BP | GO:0007565 | female pregnancy                                        | 185 | 0.361331 | 1.723652 | 0.000191 | 0.004738 | 0.003574 |
| GO-BP | GO:0007586 | digestion                                               | 125 | 0.383272 | 1.729649 | 0.000191 | 0.004738 | 0.003574 |
| GO-BP | GO:0071222 | cellular response to lipopolysaccharide                 | 185 | 0.400963 | 1.912708 | 0.000191 | 0.004738 | 0.003574 |
| GO-BP | GO:0003206 | cardiac chamber morphogenesis                           | 127 | 0.380317 | 1.720461 | 0.000191 | 0.004738 | 0.003574 |
| GO-BP | GO:0042737 | drug catabolic process                                  | 127 | 0.403907 | 1.827175 | 0.000191 | 0.004738 | 0.003574 |
| GO-BP | GO:0046683 | response to organophosphorus                            | 127 | 0.444038 | 2.008717 | 0.000191 | 0.004738 | 0.003574 |
| GO-BP | GO:0050704 | regulation of interleukin-1 secretion                   | 45  | 0.561179 | 2.087294 | 0.000191 | 0.004738 | 0.003574 |
| GO-BP | GO:0007588 | excretion                                               | 59  | 0.579623 | 2.286106 | 0.000191 | 0.004738 | 0.003574 |
| GO-BP | GO:0045861 | negative regulation of proteolysis                      | 321 | 0.334608 | 1.705735 | 0.000191 | 0.004738 | 0.003574 |
| GO-BP | GO:0071706 | tumor necrosis factor superfamily cytokine production   | 144 | 0.389749 | 1.798018 | 0.000191 | 0.004738 | 0.003574 |
| GO-BP | GO:0010631 | epithelial cell migration                               | 273 | 0.327657 | 1.642389 | 0.000191 | 0.004738 | 0.003574 |
| GO-BP | GO:0032675 | regulation of interleukin-6 production                  | 132 | 0.384387 | 1.750207 | 0.000191 | 0.004738 | 0.003574 |
| GO-BP | GO:0048660 | regulation of smooth muscle cell proliferation          | 132 | 0.399066 | 1.817045 | 0.000191 | 0.004738 | 0.003574 |
| GO-BP | GO:0050729 | positive regulation of inflammatory response            | 132 | 0.407678 | 1.856258 | 0.000191 | 0.004738 | 0.003574 |
| GO-BP | GO:0051606 | detection of stimulus                                   | 325 | 0.310815 | 1.585968 | 0.000191 | 0.004738 | 0.003574 |
| GO-BP | GO:0060326 | cell chemotaxis                                         | 275 | 0.331459 | 1.663174 | 0.000191 | 0.004738 | 0.003574 |
| GO-BP | GO:0006720 | isoprenoid metabolic process                            | 126 | 0.399063 | 1.802203 | 0.000191 | 0.004738 | 0.003574 |
| GO-BP | GO:0030574 | collagen catabolic process                              | 46  | 0.558597 | 2.088542 | 0.000191 | 0.004738 | 0.003574 |
| GO-BP | GO:0046425 | regulation of JAK-STAT cascade                          | 126 | 0.389142 | 1.757397 | 0.000191 | 0.004738 | 0.003574 |
| GO-BP | GO:0048662 | negative regulation of smooth muscle cell proliferation | 46  | 0.53376  | 1.995678 | 0.000191 | 0.004738 | 0.003574 |
| GO-BP | GO:0050702 | interleukin-1 beta secretion                            | 46  | 0.564362 | 2.110097 | 0.000191 | 0.004738 | 0.003574 |
| GO-BP | GO:0001659 | temperature homeostasis                                 | 170 | 0.37276  | 1.757174 | 0.000191 | 0.004738 | 0.003574 |
| GO-BP | GO:0090132 | epithelium migration                                    | 276 | 0.325111 | 1.631507 | 0.000191 | 0.004738 | 0.003574 |
| GO-BP | GO:0019730 | antimicrobial humoral response                          | 105 | 0.435227 | 1.912094 | 0.000191 | 0.004738 | 0.003574 |
| GO-BP | GO:0009914 | hormone transport                                       | 316 | 0.354447 | 1.802539 | 0.000191 | 0.004738 | 0.003574 |
| GO-BP | GO:0002793 | positive regulation of peptide secretion                | 274 | 0.350809 | 1.758992 | 0.000191 | 0.004738 | 0.003574 |
| GO-BP | GO:0035150 | regulation of tube size                                 | 138 | 0.438533 | 2.009745 | 0.000191 | 0.004738 | 0.003574 |
| GO-BP | GO:0042133 | neurotransmitter metabolic process                      | 138 | 0.421585 | 1.932075 | 0.000191 | 0.004738 | 0.003574 |
| GO-BP | GO:0046887 | positive regulation of hormone secretion                | 129 | 0.412189 | 1.868801 | 0.000191 | 0.004738 | 0.003574 |
| GO-BP | GO:0050715 | positive regulation of cytokine secretion               | 129 | 0.383461 | 1.738553 | 0.000191 | 0.004738 | 0.003574 |
| GO-BP | GO:0055123 | digestive system development                            | 138 | 0.374089 | 1.714409 | 0.000191 | 0.004738 | 0.003574 |
| GO-BP | GO:0019229 | regulation of vasoconstriction                          | 57  | 0.531464 | 2.08119  | 0.000191 | 0.004738 | 0.003574 |
| GO-BP | GO:0055002 | striated muscle cell development                        | 155 | 0.431023 | 2.008555 | 0.000191 | 0.004738 | 0.003574 |
| GO-BP | GO:1903305 | regulation of regulated secretory                       | 155 | 0.392334 | 1.828267 | 0.000191 | 0.004738 | 0.003574 |

|       |            |                                                                                 |     |          |          |          |          |          |
|-------|------------|---------------------------------------------------------------------------------|-----|----------|----------|----------|----------|----------|
|       |            | pathway                                                                         |     |          |          |          |          |          |
| GO-BP | GO:0006027 | glycosaminoglycan catabolic process                                             | 60  | 0.501577 | 1.984965 | 0.000191 | 0.004738 | 0.003574 |
| GO-BP | GO:0032640 | tumor necrosis factor production                                                | 139 | 0.402453 | 1.845722 | 0.000191 | 0.004738 | 0.003574 |
| GO-BP | GO:0055007 | cardiac muscle cell differentiation                                             | 110 | 0.440804 | 1.953323 | 0.000191 | 0.004738 | 0.003574 |
| GO-BP | GO:1903555 | regulation of tumor necrosis factor<br>superfamily cytokine production          | 139 | 0.40287  | 1.847634 | 0.000191 | 0.004738 | 0.003574 |
| GO-BP | GO:0050764 | regulation of phagocytosis                                                      | 88  | 0.494939 | 2.105579 | 0.000191 | 0.004738 | 0.003574 |
| GO-BP | GO:0001890 | placenta development                                                            | 147 | 0.400362 | 1.851774 | 0.000191 | 0.004738 | 0.003574 |
| GO-BP | GO:0008277 | regulation of G protein-coupled<br>receptor signaling pathway                   | 143 | 0.368937 | 1.698971 | 0.000191 | 0.004738 | 0.003574 |
| GO-BP | GO:0019359 | nicotinamide nucleotide biosynthetic<br>process                                 | 143 | 0.371316 | 1.709929 | 0.000191 | 0.004738 | 0.003574 |
| GO-BP | GO:0019363 | pyridine nucleotide biosynthetic<br>process                                     | 143 | 0.371316 | 1.709929 | 0.000191 | 0.004738 | 0.003574 |
| GO-BP | GO:0045807 | positive regulation of endocytosis                                              | 143 | 0.374655 | 1.725303 | 0.000191 | 0.004738 | 0.003574 |
| GO-BP | GO:0055067 | monovalent inorganic cation<br>homeostasis                                      | 147 | 0.404943 | 1.872963 | 0.000191 | 0.004738 | 0.003574 |
| GO-BP | GO:0007189 | adenylate cyclase-activating G<br>protein-coupled receptor signaling<br>pathway | 128 | 0.388115 | 1.757136 | 0.000191 | 0.004738 | 0.003574 |
| GO-BP | GO:0045766 | positive regulation of angiogenesis                                             | 159 | 0.387257 | 1.810293 | 0.000191 | 0.004738 | 0.003574 |
| GO-BP | GO:0048659 | smooth muscle cell proliferation                                                | 134 | 0.397494 | 1.811997 | 0.000192 | 0.004738 | 0.003574 |
| GO-BP | GO:0060078 | regulation of postsynaptic membrane<br>potential                                | 134 | 0.477559 | 2.17698  | 0.000192 | 0.004738 | 0.003574 |
| GO-BP | GO:0006638 | neutral lipid metabolic process                                                 | 119 | 0.380357 | 1.702141 | 0.000192 | 0.004738 | 0.003574 |
| GO-BP | GO:0010959 | regulation of metal ion transport                                               | 370 | 0.304255 | 1.575105 | 0.000192 | 0.004738 | 0.003574 |
| GO-BP | GO:0015844 | monoamine transport                                                             | 82  | 0.451598 | 1.896075 | 0.000192 | 0.004738 | 0.003574 |
| GO-BP | GO:0097756 | negative regulation of blood vessel<br>diameter                                 | 81  | 0.503304 | 2.109622 | 0.000192 | 0.004738 | 0.003574 |
| GO-BP | GO:0098754 | detoxification                                                                  | 119 | 0.404712 | 1.81113  | 0.000192 | 0.004738 | 0.003574 |
| GO-BP | GO:1903426 | regulation of reactive oxygen species<br>biosynthetic process                   | 82  | 0.447054 | 1.876994 | 0.000192 | 0.004738 | 0.003574 |
| GO-BP | GO:0009593 | detection of chemical stimulus                                                  | 153 | 0.445114 | 2.069386 | 0.000192 | 0.004738 | 0.003574 |
| GO-BP | GO:0010038 | response to metal ion                                                           | 349 | 0.295992 | 1.521306 | 0.000192 | 0.004738 | 0.003574 |
| GO-BP | GO:0001505 | regulation of neurotransmitter levels                                           | 333 | 0.39174  | 2.00294  | 0.000192 | 0.004738 | 0.003574 |
| GO-BP | GO:0097530 | granulocyte migration                                                           | 131 | 0.384287 | 1.746563 | 0.000192 | 0.004738 | 0.003574 |
| GO-BP | GO:1903428 | positive regulation of reactive oxygen<br>species biosynthetic process          | 48  | 0.572375 | 2.157213 | 0.000192 | 0.004738 | 0.003574 |
| GO-BP | GO:0002526 | acute inflammatory response                                                     | 150 | 0.437695 | 2.029057 | 0.000192 | 0.004738 | 0.003574 |
| GO-BP | GO:0003002 | regionalization                                                                 | 334 | 0.312541 | 1.598222 | 0.000192 | 0.004738 | 0.003574 |
| GO-BP | GO:0006936 | muscle contraction                                                              | 340 | 0.321028 | 1.644797 | 0.000192 | 0.004738 | 0.003574 |
| GO-BP | GO:0006140 | regulation of nucleotide metabolic<br>process                                   | 140 | 0.39448  | 1.810158 | 0.000192 | 0.004738 | 0.003574 |
| GO-BP | GO:0035051 | cardiocyte differentiation                                                      | 140 | 0.425707 | 1.953448 | 0.000192 | 0.004738 | 0.003574 |

|       |            |                                                                    |     |          |          |          |          |          |
|-------|------------|--------------------------------------------------------------------|-----|----------|----------|----------|----------|----------|
| GO-BP | GO:0031960 | response to corticosteroid                                         | 158 | 0.407804 | 1.905192 | 0.000192 | 0.004738 | 0.003574 |
| GO-BP | GO:0016999 | antibiotic metabolic process                                       | 142 | 0.416717 | 1.915605 | 0.000192 | 0.004738 | 0.003574 |
| GO-BP | GO:0051384 | response to glucocorticoid                                         | 142 | 0.410885 | 1.888799 | 0.000192 | 0.004738 | 0.003574 |
| GO-BP | GO:0035296 | regulation of tube diameter                                        | 137 | 0.440299 | 2.014549 | 0.000192 | 0.004738 | 0.003574 |
| GO-BP | GO:0045834 | positive regulation of lipid metabolic process                     | 137 | 0.42045  | 1.923729 | 0.000192 | 0.004738 | 0.003574 |
| GO-BP | GO:0050880 | regulation of blood vessel size                                    | 137 | 0.440299 | 2.014549 | 0.000192 | 0.004738 | 0.003574 |
| GO-BP | GO:0097746 | regulation of blood vessel diameter                                | 137 | 0.440299 | 2.014549 | 0.000192 | 0.004738 | 0.003574 |
| GO-BP | GO:0051588 | regulation of neurotransmitter transport                           | 135 | 0.402843 | 1.837402 | 0.000192 | 0.004738 | 0.003574 |
| GO-BP | GO:1905952 | regulation of lipid localization                                   | 135 | 0.384694 | 1.75462  | 0.000192 | 0.004738 | 0.003574 |
| GO-BP | GO:0032680 | regulation of tumor necrosis factor production                     | 136 | 0.407343 | 1.860182 | 0.000192 | 0.004738 | 0.003574 |
| GO-BP | GO:0014074 | response to purine-containing compound                             | 141 | 0.439838 | 2.019436 | 0.000192 | 0.004738 | 0.003574 |
| GO-BP | GO:0032635 | interleukin-6 production                                           | 141 | 0.380198 | 1.745608 | 0.000192 | 0.004738 | 0.003574 |
| GO-BP | GO:0035690 | cellular response to drug                                          | 343 | 0.298091 | 1.527618 | 0.000192 | 0.004738 | 0.003574 |
| GO-BP | GO:0062013 | positive regulation of small molecule metabolic process            | 141 | 0.41782  | 1.918345 | 0.000192 | 0.004738 | 0.003574 |
| GO-BP | GO:0042692 | muscle cell differentiation                                        | 339 | 0.328752 | 1.682892 | 0.000192 | 0.004738 | 0.003574 |
| GO-BP | GO:0030198 | extracellular matrix organization                                  | 351 | 0.371936 | 1.911864 | 0.000193 | 0.004738 | 0.003574 |
| GO-BP | GO:0030098 | lymphocyte differentiation                                         | 343 | -0.31353 | -1.62351 | 0.000208 | 0.004738 | 0.003574 |
| GO-BP | GO:0016571 | histone methylation                                                | 136 | -0.4468  | -2.05016 | 0.000208 | 0.004738 | 0.003574 |
| GO-BP | GO:0006261 | DNA-dependent DNA replication                                      | 149 | -0.49743 | -2.31206 | 0.000208 | 0.004738 | 0.003574 |
| GO-BP | GO:0002429 | immune response-activating cell surface receptor signaling pathway | 352 | -0.34024 | -1.76526 | 0.000209 | 0.004738 | 0.003574 |
| GO-BP | GO:0034470 | ncRNA processing                                                   | 348 | -0.45474 | -2.35756 | 0.000209 | 0.004738 | 0.003574 |
| GO-BP | GO:0060271 | cilium assembly                                                    | 353 | -0.39223 | -2.03475 | 0.000209 | 0.004738 | 0.003574 |
| GO-BP | GO:0034728 | nucleosome organization                                            | 150 | -0.40641 | -1.89086 | 0.000209 | 0.004738 | 0.003574 |
| GO-BP | GO:0031497 | chromatin assembly                                                 | 131 | -0.4348  | -1.98337 | 0.000209 | 0.004738 | 0.003574 |
| GO-BP | GO:0061647 | histone H3-K9 modification                                         | 48  | -0.56009 | -2.12813 | 0.000209 | 0.004738 | 0.003574 |
| GO-BP | GO:0006333 | chromatin assembly or disassembly                                  | 157 | -0.40339 | -1.89146 | 0.000209 | 0.004738 | 0.003574 |
| GO-BP | GO:0033046 | negative regulation of sister chromatid segregation                | 44  | -0.56847 | -2.1275  | 0.000209 | 0.004738 | 0.003574 |
| GO-BP | GO:0034724 | DNA replication-independent nucleosome organization                | 44  | -0.56616 | -2.11887 | 0.000209 | 0.004738 | 0.003574 |
| GO-BP | GO:0000070 | mitotic sister chromatid segregation                               | 148 | -0.45215 | -2.09745 | 0.000209 | 0.004738 | 0.003574 |
| GO-BP | GO:0009451 | RNA modification                                                   | 153 | -0.47632 | -2.22379 | 0.000209 | 0.004738 | 0.003574 |
| GO-BP | GO:0006400 | tRNA modification                                                  | 82  | -0.53046 | -2.24484 | 0.000209 | 0.004738 | 0.003574 |
| GO-BP | GO:0007051 | spindle organization                                               | 159 | -0.40116 | -1.88578 | 0.000209 | 0.004738 | 0.003574 |
| GO-BP | GO:0036297 | interstrand cross-link repair                                      | 49  | -0.59893 | -2.28387 | 0.000209 | 0.004738 | 0.003574 |
| GO-BP | GO:0000725 | recombinational repair                                             | 128 | -0.45498 | -2.06825 | 0.000209 | 0.004738 | 0.003574 |
| GO-BP | GO:0031023 | microtubule organizing center organization                         | 128 | -0.42635 | -1.93813 | 0.000209 | 0.004738 | 0.003574 |



|       |            |                                                                                      |     |          |          |          |          |          |
|-------|------------|--------------------------------------------------------------------------------------|-----|----------|----------|----------|----------|----------|
| GO-BP | GO:0031123 | RNA 3'-end processing                                                                | 128 | -0.42663 | -1.93936 | 0.000209 | 0.004738 | 0.003574 |
| GO-BP | GO:0032259 | methylation                                                                          | 346 | -0.37594 | -1.94713 | 0.000209 | 0.004738 | 0.003574 |
| GO-BP | GO:0000375 | RNA splicing, via transesterification reactions                                      | 317 | -0.40788 | -2.09138 | 0.000209 | 0.004738 | 0.003574 |
| GO-BP | GO:0000723 | telomere maintenance                                                                 | 147 | -0.44813 | -2.0756  | 0.000209 | 0.004738 | 0.003574 |
| GO-BP | GO:0031124 | mRNA 3'-end processing                                                               | 88  | -0.45439 | -1.94424 | 0.000209 | 0.004738 | 0.003574 |
| GO-BP | GO:0007098 | centrosome cycle                                                                     | 120 | -0.41399 | -1.86437 | 0.000209 | 0.004738 | 0.003574 |
| GO-BP | GO:2001251 | negative regulation of chromosome organization                                       | 139 | -0.45673 | -2.10027 | 0.000209 | 0.004738 | 0.003574 |
| GO-BP | GO:0006334 | nucleosome assembly                                                                  | 111 | -0.44862 | -1.99677 | 0.000209 | 0.004738 | 0.003574 |
| GO-BP | GO:0010970 | transport along microtubule                                                          | 155 | -0.38681 | -1.80931 | 0.000209 | 0.004738 | 0.003574 |
| GO-BP | GO:0099111 | microtubule-based transport                                                          | 155 | -0.38681 | -1.80931 | 0.000209 | 0.004738 | 0.003574 |
| GO-BP | GO:0042254 | ribosome biogenesis                                                                  | 274 | -0.4207  | -2.12577 | 0.00021  | 0.004738 | 0.003574 |
| GO-BP | GO:0006310 | DNA recombination                                                                    | 276 | -0.38885 | -1.96525 | 0.00021  | 0.004738 | 0.003574 |
| GO-BP | GO:0044782 | cilium organization                                                                  | 369 | -0.38519 | -2.00743 | 0.00021  | 0.004738 | 0.003574 |
| GO-BP | GO:0090305 | nucleic acid phosphodiester bond hydrolysis                                          | 276 | -0.36158 | -1.82745 | 0.00021  | 0.004738 | 0.003574 |
| GO-BP | GO:0032200 | telomere organization                                                                | 156 | -0.42481 | -1.98792 | 0.00021  | 0.004738 | 0.003574 |
| GO-BP | GO:0033047 | regulation of mitotic sister chromatid segregation                                   | 67  | -0.47215 | -1.92329 | 0.00021  | 0.004738 | 0.003574 |
| GO-BP | GO:0042073 | intraciliary transport                                                               | 51  | -0.53583 | -2.06331 | 0.00021  | 0.004738 | 0.003574 |
| GO-BP | GO:0033260 | nuclear DNA replication                                                              | 59  | -0.51126 | -2.03075 | 0.00021  | 0.004738 | 0.003574 |
| GO-BP | GO:0034968 | histone lysine methylation                                                           | 112 | -0.46859 | -2.08814 | 0.00021  | 0.004738 | 0.003574 |
| GO-BP | GO:0000724 | double-strand break repair via homologous recombination                              | 127 | -0.458   | -2.07829 | 0.00021  | 0.004738 | 0.003574 |
| GO-BP | GO:0034508 | centromere complex assembly                                                          | 45  | -0.56327 | -2.11431 | 0.00021  | 0.004738 | 0.003574 |
| GO-BP | GO:0018022 | peptidyl-lysine methylation                                                          | 125 | -0.47028 | -2.12758 | 0.00021  | 0.004738 | 0.003574 |
| GO-BP | GO:0033048 | negative regulation of mitotic sister chromatid segregation                          | 42  | -0.57064 | -2.11012 | 0.00021  | 0.004738 | 0.003574 |
| GO-BP | GO:0044839 | cell cycle G2/M phase transition                                                     | 256 | -0.3429  | -1.71612 | 0.00021  | 0.004738 | 0.003574 |
| GO-BP | GO:0140014 | mitotic nuclear division                                                             | 256 | -0.35254 | -1.76433 | 0.00021  | 0.004738 | 0.003574 |
| GO-BP | GO:0045058 | T cell selection                                                                     | 47  | -0.52616 | -1.99015 | 0.00021  | 0.004738 | 0.003574 |
| GO-BP | GO:0050853 | B cell receptor signaling pathway                                                    | 64  | -0.54436 | -2.1959  | 0.00021  | 0.004738 | 0.003574 |
| GO-BP | GO:0000377 | RNA splicing, via transesterification reactions with bulged adenosine as nucleophile | 314 | -0.40846 | -2.09314 | 0.00021  | 0.004738 | 0.003574 |
| GO-BP | GO:0000398 | mRNA splicing, via spliceosome                                                       | 314 | -0.40846 | -2.09314 | 0.00021  | 0.004738 | 0.003574 |
| GO-BP | GO:0072331 | signal transduction by p53 class mediator                                            | 255 | -0.343   | -1.71511 | 0.00021  | 0.004738 | 0.003574 |
| GO-BP | GO:0033077 | T cell differentiation in thymus                                                     | 69  | -0.45816 | -1.87624 | 0.00021  | 0.004738 | 0.003574 |
| GO-BP | GO:0050854 | regulation of antigen receptor-mediated signaling pathway                            | 62  | -0.60851 | -2.43887 | 0.00021  | 0.004738 | 0.003574 |
| GO-BP | GO:0097711 | ciliary basal body-plasma membrane docking                                           | 94  | -0.47361 | -2.05264 | 0.00021  | 0.004738 | 0.003574 |

|       |            |                                                         |     |          |          |          |          |          |
|-------|------------|---------------------------------------------------------|-----|----------|----------|----------|----------|----------|
| GO-BP | GO:0030705 | cytoskeleton-dependent intracellular transport          | 174 | -0.36019 | -1.7145  | 0.00021  | 0.004738 | 0.003574 |
| GO-BP | GO:0033044 | regulation of chromosome organization                   | 327 | -0.36302 | -1.86668 | 0.00021  | 0.004738 | 0.003574 |
| GO-BP | GO:0051983 | regulation of chromosome segregation                    | 100 | -0.45912 | -2.01209 | 0.00021  | 0.004738 | 0.003574 |
| GO-BP | GO:0008033 | tRNA processing                                         | 123 | -0.49836 | -2.25115 | 0.00021  | 0.004738 | 0.003574 |
| GO-BP | GO:0051236 | establishment of RNA localization                       | 179 | -0.37209 | -1.77696 | 0.00021  | 0.004738 | 0.003574 |
| GO-BP | GO:0006336 | DNA replication-independent nucleosome assembly         | 43  | -0.55717 | -2.0714  | 0.00021  | 0.004738 | 0.003574 |
| GO-BP | GO:0018023 | peptidyl-lysine trimethylation                          | 43  | -0.53349 | -1.98336 | 0.00021  | 0.004738 | 0.003574 |
| GO-BP | GO:0031060 | regulation of histone methylation                       | 63  | -0.51955 | -2.09005 | 0.00021  | 0.004738 | 0.003574 |
| GO-BP | GO:0032508 | DNA duplex unwinding                                    | 106 | -0.53901 | -2.38134 | 0.000211 | 0.004738 | 0.003574 |
| GO-BP | GO:0006301 | postreplication repair                                  | 50  | -0.5145  | -1.96871 | 0.000211 | 0.004738 | 0.003574 |
| GO-BP | GO:0032392 | DNA geometric change                                    | 115 | -0.51743 | -2.31424 | 0.000211 | 0.004738 | 0.003574 |
| GO-BP | GO:0072698 | protein localization to microtubule cytoskeleton        | 50  | -0.5999  | -2.29546 | 0.000211 | 0.004738 | 0.003574 |
| GO-BP | GO:0043414 | macromolecule methylation                               | 294 | -0.39597 | -2.01593 | 0.000211 | 0.004738 | 0.003574 |
| GO-BP | GO:1905515 | non-motile cilium assembly                              | 54  | -0.53882 | -2.0972  | 0.000211 | 0.004738 | 0.003574 |
| GO-BP | GO:0044380 | protein localization to cytoskeleton                    | 55  | -0.56363 | -2.20328 | 0.000211 | 0.004738 | 0.003574 |
| GO-BP | GO:0033045 | regulation of sister chromatid segregation              | 79  | -0.46216 | -1.94023 | 0.000211 | 0.004738 | 0.003574 |
| GO-BP | GO:0007059 | chromosome segregation                                  | 307 | -0.3683  | -1.88293 | 0.000211 | 0.004738 | 0.003574 |
| GO-BP | GO:0031503 | protein-containing complex localization                 | 264 | -0.32293 | -1.62117 | 0.000211 | 0.004738 | 0.003574 |
| GO-BP | GO:0006323 | DNA packaging                                           | 176 | -0.40856 | -1.947   | 0.000211 | 0.004738 | 0.003574 |
| GO-BP | GO:0006399 | tRNA metabolic process                                  | 182 | -0.501   | -2.3938  | 0.000211 | 0.004738 | 0.003574 |
| GO-BP | GO:0050657 | nucleic acid transport                                  | 176 | -0.36982 | -1.7624  | 0.000211 | 0.004738 | 0.003574 |
| GO-BP | GO:0050658 | RNA transport                                           | 176 | -0.36982 | -1.7624  | 0.000211 | 0.004738 | 0.003574 |
| GO-BP | GO:0006479 | protein methylation                                     | 173 | -0.43147 | -2.05039 | 0.000211 | 0.004738 | 0.003574 |
| GO-BP | GO:0008213 | protein alkylation                                      | 173 | -0.43147 | -2.05039 | 0.000211 | 0.004738 | 0.003574 |
| GO-BP | GO:1901796 | regulation of signal transduction by p53 class mediator | 173 | -0.37357 | -1.77526 | 0.000211 | 0.004738 | 0.003574 |
| GO-BP | GO:0044786 | cell cycle DNA replication                              | 70  | -0.49602 | -2.03363 | 0.000211 | 0.004738 | 0.003574 |
| GO-BP | GO:0006260 | DNA replication                                         | 266 | -0.44071 | -2.2152  | 0.000211 | 0.004738 | 0.003574 |
| GO-BP | GO:0070646 | protein modification by small protein removal           | 266 | -0.31685 | -1.59263 | 0.000211 | 0.004738 | 0.003574 |
| GO-BP | GO:0000819 | sister chromatid segregation                            | 180 | -0.44227 | -2.11078 | 0.000211 | 0.004738 | 0.003574 |
| GO-BP | GO:0006353 | DNA-templated transcription, termination                | 71  | -0.45513 | -1.8706  | 0.000211 | 0.004738 | 0.003574 |
| GO-BP | GO:0016579 | protein deubiquitination                                | 250 | -0.32202 | -1.60597 | 0.000211 | 0.004738 | 0.003574 |
| GO-BP | GO:0034502 | protein localization to chromosome                      | 78  | -0.46326 | -1.93681 | 0.000211 | 0.004738 | 0.003574 |
| GO-BP | GO:0043044 | ATP-dependent chromatin remodeling                      | 78  | -0.49076 | -2.0518  | 0.000211 | 0.004738 | 0.003574 |
| GO-BP | GO:0071824 | protein-DNA complex subunit                             | 249 | -0.40627 | -2.02584 | 0.000211 | 0.004738 | 0.003574 |

|       |            |                                                                    |     |          |          |          |          |          |
|-------|------------|--------------------------------------------------------------------|-----|----------|----------|----------|----------|----------|
|       |            | organization                                                       |     |          |          |          |          |          |
| GO-BP | GO:0098813 | nuclear chromosome segregation                                     | 250 | -0.38309 | -1.91053 | 0.000211 | 0.004738 | 0.003574 |
| GO-BP | GO:0010389 | regulation of G2/M transition of mitotic cell cycle                | 188 | -0.36144 | -1.73519 | 0.000211 | 0.004738 | 0.003574 |
| GO-BP | GO:0050852 | T cell receptor signaling pathway                                  | 188 | -0.4434  | -2.12871 | 0.000211 | 0.004738 | 0.003574 |
| GO-BP | GO:0001510 | RNA methylation                                                    | 77  | -0.52069 | -2.17233 | 0.000212 | 0.004738 | 0.003574 |
| GO-BP | GO:0010639 | negative regulation of organelle organization                      | 376 | -0.32079 | -1.67389 | 0.000212 | 0.004738 | 0.003574 |
| GO-BP | GO:0071103 | DNA conformation change                                            | 289 | -0.43067 | -2.18657 | 0.000212 | 0.004738 | 0.003574 |
| GO-BP | GO:0032886 | regulation of microtubule-based process                            | 207 | -0.33609 | -1.63596 | 0.000212 | 0.004738 | 0.003574 |
| GO-BP | GO:0000086 | G2/M transition of mitotic cell cycle                              | 237 | -0.34479 | -1.70768 | 0.000212 | 0.004738 | 0.003574 |
| GO-BP | GO:0050851 | antigen receptor-mediated signaling pathway                        | 237 | -0.4812  | -2.38331 | 0.000212 | 0.004738 | 0.003574 |
| GO-BP | GO:0000075 | cell cycle checkpoint                                              | 208 | -0.36233 | -1.76399 | 0.000212 | 0.004738 | 0.003574 |
| GO-BP | GO:0050857 | positive regulation of antigen receptor-mediated signaling pathway | 22  | -0.67973 | -2.15153 | 0.000212 | 0.004738 | 0.003574 |
| GO-BP | GO:0016072 | rRNA metabolic process                                             | 234 | -0.44575 | -2.20273 | 0.000212 | 0.004738 | 0.003574 |
| GO-BP | GO:0071826 | ribonucleoprotein complex subunit organization                     | 234 | -0.37526 | -1.85439 | 0.000212 | 0.004738 | 0.003574 |
| GO-BP | GO:0033683 | nucleotide-excision repair, DNA incision                           | 38  | -0.57253 | -2.0659  | 0.000212 | 0.004738 | 0.003574 |
| GO-BP | GO:1902749 | regulation of cell cycle G2/M phase transition                     | 205 | -0.35451 | -1.72287 | 0.000212 | 0.004738 | 0.003574 |
| GO-BP | GO:1905508 | protein localization to microtubule organizing center              | 32  | -0.60327 | -2.09247 | 0.000212 | 0.004738 | 0.003574 |
| GO-BP | GO:0006364 | rRNA processing                                                    | 197 | -0.45246 | -2.18728 | 0.000212 | 0.004738 | 0.003574 |
| GO-BP | GO:0043368 | positive T cell selection                                          | 34  | -0.60702 | -2.13606 | 0.000212 | 0.004738 | 0.003574 |
| GO-BP | GO:0018205 | peptidyl-lysine modification                                       | 379 | -0.33365 | -1.74188 | 0.000212 | 0.004738 | 0.003574 |
| GO-BP | GO:0065004 | protein-DNA complex assembly                                       | 210 | -0.43142 | -2.10301 | 0.000212 | 0.004738 | 0.003574 |
| GO-BP | GO:0045930 | negative regulation of mitotic cell cycle                          | 304 | -0.32401 | -1.65285 | 0.000212 | 0.004738 | 0.003574 |
| GO-BP | GO:0002768 | immune response-regulating cell surface receptor signaling pathway | 385 | -0.32921 | -1.72192 | 0.000212 | 0.004738 | 0.003574 |
| GO-BP | GO:0006403 | RNA localization                                                   | 211 | -0.36237 | -1.76653 | 0.000213 | 0.004738 | 0.003574 |
| GO-BP | GO:0035735 | intraciliary transport involved in cilium assembly                 | 39  | -0.61901 | -2.24363 | 0.000213 | 0.004738 | 0.003574 |
| GO-BP | GO:0045005 | DNA-dependent DNA replication maintenance of fidelity              | 39  | -0.56745 | -2.05674 | 0.000213 | 0.004738 | 0.003574 |
| GO-BP | GO:0050856 | regulation of T cell receptor signaling pathway                    | 39  | -0.61364 | -2.22415 | 0.000213 | 0.004738 | 0.003574 |
| GO-BP | GO:2000816 | negative regulation of mitotic sister chromatid separation         | 39  | -0.552   | -2.00075 | 0.000213 | 0.004738 | 0.003574 |
| GO-BP | GO:0031055 | chromatin remodeling at centromere                                 | 37  | -0.57519 | -2.06224 | 0.000213 | 0.004738 | 0.003574 |

|       |            |                                                               |     |          |          |          |          |          |
|-------|------------|---------------------------------------------------------------|-----|----------|----------|----------|----------|----------|
| GO-BP | GO:0031062 | positive regulation of histone methylation                    | 37  | -0.55283 | -1.98205 | 0.000213 | 0.004738 | 0.003574 |
| GO-BP | GO:0051567 | histone H3-K9 methylation                                     | 37  | -0.5532  | -1.98339 | 0.000213 | 0.004738 | 0.003574 |
| GO-BP | GO:0002250 | adaptive immune response                                      | 405 | -0.30217 | -1.5906  | 0.000213 | 0.004738 | 0.003574 |
| GO-BP | GO:0016569 | covalent chromatin modification                               | 452 | -0.32544 | -1.73286 | 0.000213 | 0.004738 | 0.003574 |
| GO-BP | GO:0051052 | regulation of DNA metabolic process                           | 408 | -0.30151 | -1.5886  | 0.000213 | 0.004738 | 0.003574 |
| GO-BP | GO:0000280 | nuclear division                                              | 391 | -0.30282 | -1.58698 | 0.000213 | 0.004738 | 0.003574 |
| GO-BP | GO:0042113 | B cell activation                                             | 241 | -0.33976 | -1.68453 | 0.000213 | 0.004738 | 0.003574 |
| GO-BP | GO:0006302 | double-strand break repair                                    | 229 | -0.41048 | -2.01954 | 0.000213 | 0.004738 | 0.003574 |
| GO-BP | GO:0022618 | ribonucleoprotein complex assembly                            | 220 | -0.39043 | -1.91088 | 0.000214 | 0.004738 | 0.003574 |
| GO-BP | GO:0016570 | histone modification                                          | 436 | -0.32129 | -1.70472 | 0.000214 | 0.004738 | 0.003574 |
| GO-BP | GO:0048285 | organelle fission                                             | 430 | -0.29862 | -1.58115 | 0.000214 | 0.004738 | 0.003574 |
| GO-BP | GO:0022613 | ribonucleoprotein complex biogenesis                          | 433 | -0.41703 | -2.21104 | 0.000214 | 0.004738 | 0.003574 |
| GO-BP | GO:0008380 | RNA splicing                                                  | 396 | -0.39357 | -2.0643  | 0.000215 | 0.004738 | 0.003574 |
| GO-BP | GO:1901987 | regulation of cell cycle phase transition                     | 428 | -0.28289 | -1.49689 | 0.000215 | 0.004738 | 0.003574 |
| GO-BP | GO:1901990 | regulation of mitotic cell cycle phase transition             | 396 | -0.29981 | -1.57254 | 0.000215 | 0.004738 | 0.003574 |
| GO-BP | GO:0006397 | mRNA processing                                               | 463 | -0.38964 | -2.07638 | 0.000215 | 0.004738 | 0.003574 |
| GO-BP | GO:0031349 | positive regulation of defense response                       | 478 | 0.273499 | 1.455386 | 0.000374 | 0.007355 | 0.005548 |
| GO-BP | GO:0006979 | response to oxidative stress                                  | 418 | 0.28184  | 1.480313 | 0.000375 | 0.007355 | 0.005548 |
| GO-BP | GO:0051048 | negative regulation of secretion                              | 218 | 0.327102 | 1.598674 | 0.000375 | 0.007355 | 0.005548 |
| GO-BP | GO:0097237 | cellular response to toxic substance                          | 226 | 0.319766 | 1.569434 | 0.000375 | 0.007355 | 0.005548 |
| GO-BP | GO:0001501 | skeletal system development                                   | 500 | 0.281351 | 1.502491 | 0.000375 | 0.007355 | 0.005548 |
| GO-BP | GO:0032490 | detection of molecule of bacterial origin                     | 10  | 0.796288 | 1.97725  | 0.000376 | 0.007355 | 0.005548 |
| GO-BP | GO:0010632 | regulation of epithelial cell migration                       | 214 | 0.327022 | 1.594025 | 0.000377 | 0.007355 | 0.005548 |
| GO-BP | GO:0045429 | positive regulation of nitric oxide biosynthetic process      | 37  | 0.575952 | 2.053809 | 0.000377 | 0.007355 | 0.005548 |
| GO-BP | GO:0043304 | regulation of mast cell degranulation                         | 31  | 0.572176 | 1.953735 | 0.000377 | 0.007355 | 0.005548 |
| GO-BP | GO:0043435 | response to corticotropin-releasing hormone                   | 5   | 0.922839 | 1.828254 | 0.000377 | 0.007355 | 0.005548 |
| GO-BP | GO:0051194 | positive regulation of cofactor metabolic process             | 31  | 0.566472 | 1.934258 | 0.000377 | 0.007355 | 0.005548 |
| GO-BP | GO:0071376 | cellular response to corticotropin-releasing hormone stimulus | 5   | 0.922839 | 1.828254 | 0.000377 | 0.007355 | 0.005548 |
| GO-BP | GO:0009746 | response to hexose                                            | 193 | 0.346612 | 1.66458  | 0.000378 | 0.007355 | 0.005548 |
| GO-BP | GO:0030073 | insulin secretion                                             | 204 | 0.340143 | 1.6472   | 0.000378 | 0.007355 | 0.005548 |
| GO-BP | GO:0010574 | regulation of vascular endothelial growth factor production   | 33  | 0.576898 | 2.003306 | 0.000378 | 0.007355 | 0.005548 |
| GO-BP | GO:0048665 | neuron fate specification                                     | 33  | 0.575424 | 1.998188 | 0.000378 | 0.007355 | 0.005548 |
| GO-BP | GO:0045444 | fat cell differentiation                                      | 205 | 0.32815  | 1.589613 | 0.000379 | 0.007355 | 0.005548 |

|       |            |                                                            |     |          |          |          |          |          |
|-------|------------|------------------------------------------------------------|-----|----------|----------|----------|----------|----------|
| GO-BP | GO:0007626 | locomotory behavior                                        | 192 | 0.342447 | 1.642879 | 0.000379 | 0.007355 | 0.005548 |
| GO-BP | GO:0070482 | response to oxygen levels                                  | 376 | 0.286888 | 1.489743 | 0.000379 | 0.007355 | 0.005548 |
| GO-BP | GO:0006690 | icosanoid metabolic process                                | 102 | 0.414679 | 1.813303 | 0.00038  | 0.007355 | 0.005548 |
| GO-BP | GO:0030004 | cellular monovalent inorganic cation homeostasis           | 102 | 0.406237 | 1.776389 | 0.00038  | 0.007355 | 0.005548 |
| GO-BP | GO:1903524 | positive regulation of blood circulation                   | 70  | 0.481341 | 1.965323 | 0.00038  | 0.007355 | 0.005548 |
| GO-BP | GO:0034284 | response to monosaccharide                                 | 198 | 0.336849 | 1.622127 | 0.00038  | 0.007355 | 0.005548 |
| GO-BP | GO:0071375 | cellular response to peptide hormone stimulus              | 308 | 0.308227 | 1.565401 | 0.00038  | 0.007355 | 0.005548 |
| GO-BP | GO:0050679 | positive regulation of epithelial cell proliferation       | 182 | 0.357077 | 1.701069 | 0.00038  | 0.007355 | 0.005548 |
| GO-BP | GO:0050905 | neuromuscular process                                      | 103 | 0.410243 | 1.796865 | 0.00038  | 0.007355 | 0.005548 |
| GO-BP | GO:0051917 | regulation of fibrinolysis                                 | 14  | 0.701875 | 1.927063 | 0.00038  | 0.007355 | 0.005548 |
| GO-BP | GO:0097485 | neuron projection guidance                                 | 268 | 0.304631 | 1.522757 | 0.00038  | 0.007355 | 0.005548 |
| GO-BP | GO:0097755 | positive regulation of blood vessel diameter               | 56  | 0.49335  | 1.926326 | 0.00038  | 0.007355 | 0.005548 |
| GO-BP | GO:0098543 | detection of other organism                                | 14  | 0.706652 | 1.940178 | 0.00038  | 0.007355 | 0.005548 |
| GO-BP | GO:0032760 | positive regulation of tumor necrosis factor production    | 79  | 0.443386 | 1.853359 | 0.00038  | 0.007355 | 0.005548 |
| GO-BP | GO:0045981 | positive regulation of nucleotide metabolic process        | 54  | 0.510041 | 1.975241 | 0.000381 | 0.007355 | 0.005548 |
| GO-BP | GO:0051187 | cofactor catabolic process                                 | 54  | 0.4945   | 1.915056 | 0.000381 | 0.007355 | 0.005548 |
| GO-BP | GO:1900544 | positive regulation of purine nucleotide metabolic process | 54  | 0.510041 | 1.975241 | 0.000381 | 0.007355 | 0.005548 |
| GO-BP | GO:0007218 | neuropeptide signaling pathway                             | 93  | 0.427439 | 1.837009 | 0.000381 | 0.007355 | 0.005548 |
| GO-BP | GO:0060191 | regulation of lipase activity                              | 93  | 0.431885 | 1.856117 | 0.000381 | 0.007355 | 0.005548 |
| GO-BP | GO:0099504 | synaptic vesicle cycle                                     | 187 | 0.359198 | 1.716633 | 0.000381 | 0.007355 | 0.005548 |
| GO-BP | GO:0050711 | negative regulation of interleukin-1 secretion             | 13  | 0.724989 | 1.944801 | 0.000381 | 0.007355 | 0.005548 |
| GO-BP | GO:0015696 | ammonium transport                                         | 100 | 0.442728 | 1.927145 | 0.000381 | 0.007355 | 0.005548 |
| GO-BP | GO:0018958 | phenol-containing compound metabolic process               | 96  | 0.411331 | 1.78068  | 0.000381 | 0.007355 | 0.005548 |
| GO-BP | GO:0062014 | negative regulation of small molecule metabolic process    | 96  | 0.409162 | 1.771288 | 0.000381 | 0.007355 | 0.005548 |
| GO-BP | GO:0090277 | positive regulation of peptide hormone secretion           | 96  | 0.434714 | 1.881908 | 0.000381 | 0.007355 | 0.005548 |
| GO-BP | GO:0015837 | amine transport                                            | 94  | 0.414969 | 1.786757 | 0.000381 | 0.007355 | 0.005548 |
| GO-BP | GO:0016485 | protein processing                                         | 255 | 0.314528 | 1.563254 | 0.000382 | 0.007355 | 0.005548 |
| GO-BP | GO:0045598 | regulation of fat cell differentiation                     | 116 | 0.383093 | 1.712038 | 0.000382 | 0.007355 | 0.005548 |
| GO-BP | GO:0060359 | response to ammonium ion                                   | 125 | 0.3768   | 1.700445 | 0.000382 | 0.007355 | 0.005548 |
| GO-BP | GO:1990266 | neutrophil migration                                       | 108 | 0.404579 | 1.787353 | 0.000382 | 0.007355 | 0.005548 |
| GO-BP | GO:0060562 | epithelial tube morphogenesis                              | 313 | 0.312578 | 1.588457 | 0.000382 | 0.007355 | 0.005548 |
| GO-BP | GO:2000179 | positive regulation of neural precursor                    | 51  | 0.500423 | 1.913902 | 0.000382 | 0.007355 | 0.005548 |

|       |            |                                                                              |     |          |          |          |          |          |
|-------|------------|------------------------------------------------------------------------------|-----|----------|----------|----------|----------|----------|
|       |            | cell proliferation                                                           |     |          |          |          |          |          |
| GO-BP | GO:0097479 | synaptic vesicle localization                                                | 156 | 0.359495 | 1.677871 | 0.000382 | 0.007355 | 0.005548 |
| GO-BP | GO:0035270 | endocrine system development                                                 | 126 | 0.37737  | 1.704233 | 0.000382 | 0.007355 | 0.005548 |
| GO-BP | GO:0001508 | action potential                                                             | 124 | 0.376922 | 1.699449 | 0.000382 | 0.007355 | 0.005548 |
| GO-BP | GO:0015718 | monocarboxylic acid transport                                                | 151 | 0.36357  | 1.688152 | 0.000383 | 0.007355 | 0.005548 |
| GO-BP | GO:0007156 | homophilic cell adhesion via plasma membrane adhesion molecules              | 143 | 0.36384  | 1.675498 | 0.000383 | 0.007355 | 0.005548 |
| GO-BP | GO:0017156 | calcium ion regulated exocytosis                                             | 147 | 0.358055 | 1.656095 | 0.000383 | 0.007355 | 0.005548 |
| GO-BP | GO:0048565 | digestive tract development                                                  | 128 | 0.371394 | 1.681437 | 0.000383 | 0.007355 | 0.005548 |
| GO-BP | GO:1903557 | positive regulation of tumor necrosis factor superfamily cytokine production | 81  | 0.450112 | 1.886666 | 0.000383 | 0.007355 | 0.005548 |
| GO-BP | GO:0061900 | glial cell activation                                                        | 48  | 0.519248 | 1.956984 | 0.000383 | 0.007355 | 0.005548 |
| GO-BP | GO:0007259 | JAK-STAT cascade                                                             | 142 | 0.368398 | 1.693488 | 0.000384 | 0.007355 | 0.005548 |
| GO-BP | GO:0031424 | keratinization                                                               | 135 | 0.372998 | 1.701275 | 0.000384 | 0.007355 | 0.005548 |
| GO-BP | GO:0043039 | tRNA aminoacylation                                                          | 44  | -0.52072 | -1.94882 | 0.000418 | 0.007865 | 0.005934 |
| GO-BP | GO:0007093 | mitotic cell cycle checkpoint                                                | 160 | -0.36405 | -1.71339 | 0.000419 | 0.007865 | 0.005934 |
| GO-BP | GO:0010948 | negative regulation of cell cycle process                                    | 323 | -0.30961 | -1.59078 | 0.000419 | 0.007865 | 0.005934 |
| GO-BP | GO:0043038 | amino acid activation                                                        | 45  | -0.51867 | -1.94692 | 0.00042  | 0.007865 | 0.005934 |
| GO-BP | GO:0051985 | negative regulation of chromosome segregation                                | 45  | -0.54123 | -2.03158 | 0.00042  | 0.007865 | 0.005934 |
| GO-BP | GO:0006402 | mRNA catabolic process                                                       | 328 | -0.29928 | -1.53975 | 0.00042  | 0.007865 | 0.005934 |
| GO-BP | GO:0042274 | ribosomal small subunit biogenesis                                           | 63  | -0.4692  | -1.8875  | 0.000421 | 0.007865 | 0.005934 |
| GO-BP | GO:0006268 | DNA unwinding involved in DNA replication                                    | 14  | -0.74929 | -2.09469 | 0.000422 | 0.007865 | 0.005934 |
| GO-BP | GO:0002363 | alpha-beta T cell lineage commitment                                         | 19  | -0.67112 | -2.04272 | 0.000422 | 0.007865 | 0.005934 |
| GO-BP | GO:0007052 | mitotic spindle organization                                                 | 101 | -0.42953 | -1.88344 | 0.000422 | 0.007865 | 0.005934 |
| GO-BP | GO:0002200 | somatic diversification of immune receptors                                  | 71  | -0.44879 | -1.84456 | 0.000423 | 0.007865 | 0.005934 |
| GO-BP | GO:0070987 | error-free translesion synthesis                                             | 20  | -0.70154 | -2.16783 | 0.000423 | 0.007865 | 0.005934 |
| GO-BP | GO:0006270 | DNA replication initiation                                                   | 36  | -0.56523 | -2.01636 | 0.000424 | 0.007865 | 0.005934 |
| GO-BP | GO:0006296 | nucleotide-excision repair, DNA incision, 5'-to lesion                       | 36  | -0.55613 | -1.98392 | 0.000424 | 0.007865 | 0.005934 |
| GO-BP | GO:0071539 | protein localization to centrosome                                           | 31  | -0.59245 | -2.04092 | 0.000425 | 0.007875 | 0.005941 |
| GO-BP | GO:0060560 | developmental growth involved in morphogenesis                               | 226 | 0.314425 | 1.543218 | 0.000563 | 0.009485 | 0.007155 |
| GO-BP | GO:0051346 | negative regulation of hydrolase activity                                    | 422 | 0.282188 | 1.482433 | 0.000563 | 0.009485 | 0.007155 |
| GO-BP | GO:0051222 | positive regulation of protein transport                                     | 398 | 0.283305 | 1.480176 | 0.000563 | 0.009485 | 0.007155 |
| GO-BP | GO:0050663 | cytokine secretion                                                           | 217 | 0.327114 | 1.597442 | 0.000564 | 0.009485 | 0.007155 |
| GO-BP | GO:0006816 | calcium ion transport                                                        | 412 | 0.283696 | 1.486547 | 0.000565 | 0.009485 | 0.007155 |
| GO-BP | GO:0098542 | defense response to other organism                                           | 443 | 0.273871 | 1.445423 | 0.000565 | 0.009485 | 0.007155 |

|       |            |                                                                 |     |          |          |          |          |          |
|-------|------------|-----------------------------------------------------------------|-----|----------|----------|----------|----------|----------|
| GO-BP | GO:0043542 | endothelial cell migration                                      | 196 | 0.329752 | 1.587087 | 0.000566 | 0.009485 | 0.007155 |
| GO-BP | GO:0016052 | carbohydrate catabolic process                                  | 191 | 0.328975 | 1.57807  | 0.000566 | 0.009485 | 0.007155 |
| GO-BP | GO:1903531 | negative regulation of secretion by cell                        | 193 | 0.327678 | 1.573652 | 0.000567 | 0.009485 | 0.007155 |
| GO-BP | GO:0097242 | amyloid-beta clearance                                          | 34  | 0.570134 | 1.993143 | 0.000567 | 0.009485 | 0.007155 |
| GO-BP | GO:0035637 | multicellular organismal signaling                              | 194 | 0.338912 | 1.627788 | 0.000568 | 0.009485 | 0.007155 |
| GO-BP | GO:0033006 | regulation of mast cell activation involved in immune response  | 32  | 0.560744 | 1.930463 | 0.000568 | 0.009485 | 0.007155 |
| GO-BP | GO:0045056 | transcytosis                                                    | 18  | 0.653524 | 1.931877 | 0.000568 | 0.009485 | 0.007155 |
| GO-BP | GO:0006733 | oxidoreduction coenzyme metabolic process                       | 201 | 0.323548 | 1.56263  | 0.000568 | 0.009485 | 0.007155 |
| GO-BP | GO:0006814 | sodium ion transport                                            | 206 | 0.324241 | 1.571122 | 0.000569 | 0.009485 | 0.007155 |
| GO-BP | GO:0033002 | muscle cell proliferation                                       | 189 | 0.343061 | 1.643432 | 0.000569 | 0.009485 | 0.007155 |
| GO-BP | GO:0050707 | regulation of cytokine secretion                                | 189 | 0.32911  | 1.5766   | 0.000569 | 0.009485 | 0.007155 |
| GO-BP | GO:0043406 | positive regulation of MAP kinase activity                      | 246 | 0.306093 | 1.514429 | 0.000569 | 0.009485 | 0.007155 |
| GO-BP | GO:0072524 | pyridine-containing compound metabolic process                  | 188 | 0.332033 | 1.588933 | 0.000569 | 0.009485 | 0.007155 |
| GO-BP | GO:0003007 | heart morphogenesis                                             | 247 | 0.305035 | 1.510095 | 0.000569 | 0.009485 | 0.007155 |
| GO-BP | GO:0030808 | regulation of nucleotide biosynthetic process                   | 114 | 0.382967 | 1.709624 | 0.00057  | 0.009485 | 0.007155 |
| GO-BP | GO:0031663 | lipopolysaccharide-mediated signaling pathway                   | 56  | 0.491521 | 1.919186 | 0.00057  | 0.009485 | 0.007155 |
| GO-BP | GO:0045591 | positive regulation of regulatory T cell differentiation        | 14  | 0.690136 | 1.894833 | 0.00057  | 0.009485 | 0.007155 |
| GO-BP | GO:0050918 | positive chemotaxis                                             | 56  | 0.482805 | 1.885152 | 0.00057  | 0.009485 | 0.007155 |
| GO-BP | GO:0060688 | regulation of morphogenesis of a branching structure            | 56  | 0.481519 | 1.880131 | 0.00057  | 0.009485 | 0.007155 |
| GO-BP | GO:1990748 | cellular detoxification                                         | 103 | 0.38827  | 1.70062  | 0.00057  | 0.009485 | 0.007155 |
| GO-BP | GO:2001044 | regulation of integrin-mediated signaling pathway               | 14  | 0.692756 | 1.902026 | 0.00057  | 0.009485 | 0.007155 |
| GO-BP | GO:0002886 | regulation of myeloid leukocyte mediated immunity               | 55  | 0.483302 | 1.880662 | 0.000571 | 0.009485 | 0.007155 |
| GO-BP | GO:0032722 | positive regulation of chemokine production                     | 55  | 0.494735 | 1.925148 | 0.000571 | 0.009485 | 0.007155 |
| GO-BP | GO:0071621 | granulocyte chemotaxis                                          | 113 | 0.378309 | 1.684992 | 0.000571 | 0.009485 | 0.007155 |
| GO-BP | GO:1900371 | regulation of purine nucleotide biosynthetic process            | 113 | 0.383095 | 1.706311 | 0.000571 | 0.009485 | 0.007155 |
| GO-BP | GO:0006641 | triglyceride metabolic process                                  | 97  | 0.402196 | 1.743048 | 0.000571 | 0.009485 | 0.007155 |
| GO-BP | GO:0045820 | negative regulation of glycolytic process                       | 13  | 0.716552 | 1.92217  | 0.000571 | 0.009485 | 0.007155 |
| GO-BP | GO:0019915 | lipid storage                                                   | 63  | 0.470905 | 1.881844 | 0.000571 | 0.009485 | 0.007155 |
| GO-BP | GO:0061844 | antimicrobial humoral immune response mediated by antimicrobial | 65  | 0.465022 | 1.87123  | 0.000572 | 0.009485 | 0.007155 |

|       |            |                                                   |     |          |          |          |          |          |
|-------|------------|---------------------------------------------------|-----|----------|----------|----------|----------|----------|
|       |            | peptide                                           |     |          |          |          |          |          |
| GO-BP | GO:0019362 | pyridine nucleotide metabolic process             | 183 | 0.338499 | 1.61242  | 0.000572 | 0.009485 | 0.007155 |
| GO-BP | GO:0031099 | regeneration                                      | 183 | 0.337714 | 1.608683 | 0.000572 | 0.009485 | 0.007155 |
| GO-BP | GO:0046496 | nicotinamide nucleotide metabolic process         | 183 | 0.338499 | 1.61242  | 0.000572 | 0.009485 | 0.007155 |
| GO-BP | GO:0045428 | regulation of nitric oxide biosynthetic process   | 53  | 0.493529 | 1.901661 | 0.000572 | 0.009485 | 0.007155 |
| GO-BP | GO:0009595 | detection of biotic stimulus                      | 21  | 0.654985 | 2.013295 | 0.000572 | 0.009485 | 0.007155 |
| GO-BP | GO:0031638 | zymogen activation                                | 52  | 0.4927   | 1.890862 | 0.000572 | 0.009485 | 0.007155 |
| GO-BP | GO:0060713 | labyrinthine layer morphogenesis                  | 21  | 0.644016 | 1.979577 | 0.000572 | 0.009485 | 0.007155 |
| GO-BP | GO:1905207 | regulation of cardiocyte differentiation          | 47  | 0.508411 | 1.910191 | 0.000572 | 0.009485 | 0.007155 |
| GO-BP | GO:0048545 | response to steroid hormone                       | 371 | 0.285637 | 1.479699 | 0.000573 | 0.009485 | 0.007155 |
| GO-BP | GO:0006721 | terpenoid metabolic process                       | 108 | 0.384717 | 1.699606 | 0.000573 | 0.009485 | 0.007155 |
| GO-BP | GO:0021782 | glial cell development                            | 108 | 0.381742 | 1.686465 | 0.000573 | 0.009485 | 0.007155 |
| GO-BP | GO:0035272 | exocrine system development                       | 45  | 0.528358 | 1.965218 | 0.000573 | 0.009485 | 0.007155 |
| GO-BP | GO:0045600 | positive regulation of fat cell differentiation   | 59  | 0.469679 | 1.852472 | 0.000573 | 0.009485 | 0.007155 |
| GO-BP | GO:0045806 | negative regulation of endocytosis                | 59  | 0.456149 | 1.799111 | 0.000573 | 0.009485 | 0.007155 |
| GO-BP | GO:0046503 | glycerolipid catabolic process                    | 59  | 0.474775 | 1.872574 | 0.000573 | 0.009485 | 0.007155 |
| GO-BP | GO:0060711 | labyrinthine layer development                    | 46  | 0.52326  | 1.956418 | 0.000573 | 0.009485 | 0.007155 |
| GO-BP | GO:0006805 | xenobiotic metabolic process                      | 109 | 0.386638 | 1.709961 | 0.000574 | 0.009485 | 0.007155 |
| GO-BP | GO:0071385 | cellular response to glucocorticoid stimulus      | 57  | 0.469303 | 1.837769 | 0.000574 | 0.009485 | 0.007155 |
| GO-BP | GO:0031214 | biomineral tissue development                     | 151 | 0.354718 | 1.647051 | 0.000574 | 0.009485 | 0.007155 |
| GO-BP | GO:0150076 | neuroinflammatory response                        | 60  | 0.483719 | 1.914296 | 0.000574 | 0.009485 | 0.007155 |
| GO-BP | GO:0072525 | pyridine-containing compound biosynthetic process | 146 | 0.359351 | 1.660468 | 0.000574 | 0.009485 | 0.007155 |
| GO-BP | GO:0071674 | mononuclear cell migration                        | 81  | 0.432742 | 1.81386  | 0.000575 | 0.009485 | 0.007155 |
| GO-BP | GO:1904892 | regulation of STAT cascade                        | 130 | 0.368134 | 1.671746 | 0.000575 | 0.009485 | 0.007155 |
| GO-BP | GO:1900542 | regulation of purine nucleotide metabolic process | 136 | 0.36956  | 1.687644 | 0.000577 | 0.009493 | 0.007161 |
| GO-BP | GO:0051028 | mRNA transport                                    | 136 | -0.39522 | -1.81346 | 0.000625 | 0.010086 | 0.007609 |
| GO-BP | GO:0002377 | immunoglobulin production                         | 110 | -0.39911 | -1.77397 | 0.000628 | 0.010086 | 0.007609 |
| GO-BP | GO:0006289 | nucleotide-excision repair                        | 105 | -0.40763 | -1.80129 | 0.000629 | 0.010086 | 0.007609 |
| GO-BP | GO:0045839 | negative regulation of mitotic nuclear division   | 52  | -0.49984 | -1.93273 | 0.00063  | 0.010086 | 0.007609 |
| GO-BP | GO:0006354 | DNA-templated transcription, elongation           | 107 | -0.39655 | -1.75434 | 0.000631 | 0.010086 | 0.007609 |
| GO-BP | GO:1903311 | regulation of mRNA metabolic process              | 301 | -0.29552 | -1.50808 | 0.000631 | 0.010086 | 0.007609 |
| GO-BP | GO:0000731 | DNA synthesis involved in DNA repair              | 50  | -0.50403 | -1.92864 | 0.000632 | 0.010086 | 0.007609 |
| GO-BP | GO:0006401 | RNA catabolic process                             | 360 | -0.28425 | -1.47618 | 0.000632 | 0.010086 | 0.007609 |



|       |            |                                                                    |     |          |          |          |          |          |
|-------|------------|--------------------------------------------------------------------|-----|----------|----------|----------|----------|----------|
| GO-BP | GO:0019985 | translesion synthesis                                              | 41  | -0.51749 | -1.90318 | 0.000632 | 0.010086 | 0.007609 |
| GO-BP | GO:0050862 | positive regulation of T cell receptor signaling pathway           | 14  | -0.73382 | -2.05144 | 0.000633 | 0.010086 | 0.007609 |
| GO-BP | GO:0042276 | error-prone translesion synthesis                                  | 20  | -0.68046 | -2.10268 | 0.000634 | 0.010086 | 0.007609 |
| GO-BP | GO:0070734 | histone H3-K27 methylation                                         | 20  | -0.68455 | -2.11531 | 0.000634 | 0.010086 | 0.007609 |
| GO-BP | GO:0022616 | DNA strand elongation                                              | 27  | -0.62047 | -2.06795 | 0.000635 | 0.010086 | 0.007609 |
| GO-BP | GO:1905819 | negative regulation of chromosome separation                       | 40  | -0.51765 | -1.89046 | 0.000635 | 0.010086 | 0.007609 |
| GO-BP | GO:0043543 | protein acylation                                                  | 234 | -0.31935 | -1.57812 | 0.000635 | 0.010086 | 0.007609 |
| GO-BP | GO:0008608 | attachment of spindle microtubules to kinetochore                  | 32  | -0.58058 | -2.0138  | 0.000636 | 0.010086 | 0.007609 |
| GO-BP | GO:0050855 | regulation of B cell receptor signaling pathway                    | 26  | -0.63311 | -2.08909 | 0.000636 | 0.010086 | 0.007609 |
| GO-BP | GO:2001020 | regulation of response to DNA damage stimulus                      | 203 | -0.3252  | -1.57833 | 0.000637 | 0.010086 | 0.007609 |
| GO-BP | GO:0046602 | regulation of mitotic centrosome separation                        | 9   | -0.82101 | -2.00428 | 0.000638 | 0.010086 | 0.007609 |
| GO-BP | GO:1905064 | negative regulation of vascular smooth muscle cell differentiation | 8   | -0.82814 | -1.95538 | 0.000638 | 0.010086 | 0.007609 |
| GO-BP | GO:0031297 | replication fork processing                                        | 30  | -0.59264 | -2.0208  | 0.000639 | 0.010086 | 0.007609 |
| GO-BP | GO:1904837 | beta-catenin-TCF complex assembly                                  | 30  | -0.59187 | -2.01817 | 0.000639 | 0.010086 | 0.007609 |
| GO-BP | GO:0015931 | nucleobase-containing compound transport                           | 221 | -0.31902 | -1.56233 | 0.00064  | 0.010086 | 0.007609 |
| GO-BP | GO:0003401 | axis elongation                                                    | 30  | 0.564247 | 1.90881  | 0.000754 | 0.011367 | 0.008575 |
| GO-BP | GO:0051968 | positive regulation of synaptic transmission, glutamatergic        | 30  | 0.569497 | 1.926569 | 0.000754 | 0.011367 | 0.008575 |
| GO-BP | GO:0043416 | regulation of skeletal muscle tissue regeneration                  | 8   | 0.81005  | 1.867731 | 0.000755 | 0.011367 | 0.008575 |
| GO-BP | GO:0060947 | cardiac vascular smooth muscle cell differentiation                | 8   | 0.813201 | 1.874997 | 0.000755 | 0.011367 | 0.008575 |
| GO-BP | GO:0097084 | vascular smooth muscle cell development                            | 9   | 0.788588 | 1.887891 | 0.000755 | 0.011367 | 0.008575 |
| GO-BP | GO:0030809 | negative regulation of nucleotide biosynthetic process             | 18  | 0.64716  | 1.913065 | 0.000758 | 0.011367 | 0.008575 |
| GO-BP | GO:1900372 | negative regulation of purine nucleotide biosynthetic process      | 18  | 0.64716  | 1.913065 | 0.000758 | 0.011367 | 0.008575 |
| GO-BP | GO:0003073 | regulation of systemic arterial blood pressure                     | 91  | 0.406832 | 1.7427   | 0.000759 | 0.011367 | 0.008575 |
| GO-BP | GO:0009749 | response to glucose                                                | 188 | 0.324335 | 1.552092 | 0.000759 | 0.011367 | 0.008575 |
| GO-BP | GO:0060602 | branch elongation of an epithelium                                 | 20  | 0.650494 | 1.974989 | 0.000759 | 0.011367 | 0.008575 |
| GO-BP | GO:0032868 | response to insulin                                                | 261 | 0.306593 | 1.528868 | 0.000759 | 0.011367 | 0.008575 |
| GO-BP | GO:0099003 | vesicle-mediated transport in synapse                              | 198 | 0.319651 | 1.53931  | 0.00076  | 0.011367 | 0.008575 |
| GO-BP | GO:0051966 | regulation of synaptic transmission, glutamatergic                 | 68  | 0.459611 | 1.866822 | 0.00076  | 0.011367 | 0.008575 |

|       |            |                                                                       |     |          |          |          |          |          |
|-------|------------|-----------------------------------------------------------------------|-----|----------|----------|----------|----------|----------|
| GO-BP | GO:1903670 | regulation of sprouting angiogenesis                                  | 68  | 0.4718   | 1.916331 | 0.00076  | 0.011367 | 0.008575 |
| GO-BP | GO:0045986 | negative regulation of smooth muscle contraction                      | 14  | 0.687859 | 1.88858  | 0.00076  | 0.011367 | 0.008575 |
| GO-BP | GO:0022612 | gland morphogenesis                                                   | 115 | 0.37477  | 1.673722 | 0.000761 | 0.011367 | 0.008575 |
| GO-BP | GO:0098869 | cellular oxidant detoxification                                       | 93  | 0.40936  | 1.75931  | 0.000761 | 0.011367 | 0.008575 |
| GO-BP | GO:0032570 | response to progesterone                                              | 43  | 0.526989 | 1.941727 | 0.000762 | 0.011367 | 0.008575 |
| GO-BP | GO:0071827 | plasma lipoprotein particle organization                              | 43  | 0.518817 | 1.911615 | 0.000762 | 0.011367 | 0.008575 |
| GO-BP | GO:0046928 | regulation of neurotransmitter secretion                              | 100 | 0.400193 | 1.741996 | 0.000762 | 0.011367 | 0.008575 |
| GO-BP | GO:0002673 | regulation of acute inflammatory response                             | 94  | 0.410757 | 1.768621 | 0.000763 | 0.011367 | 0.008575 |
| GO-BP | GO:0030593 | neutrophil chemotaxis                                                 | 94  | 0.404823 | 1.743067 | 0.000763 | 0.011367 | 0.008575 |
| GO-BP | GO:0051937 | catecholamine transport                                               | 69  | 0.447309 | 1.819249 | 0.000763 | 0.011367 | 0.008575 |
| GO-BP | GO:0021879 | forebrain neuron differentiation                                      | 52  | 0.469981 | 1.803671 | 0.000763 | 0.011367 | 0.008575 |
| GO-BP | GO:1904894 | positive regulation of STAT cascade                                   | 87  | 0.416526 | 1.769693 | 0.000763 | 0.011367 | 0.008575 |
| GO-BP | GO:2001023 | regulation of response to drug                                        | 85  | 0.422917 | 1.787794 | 0.000763 | 0.011367 | 0.008575 |
| GO-BP | GO:0008544 | epidermis development                                                 | 371 | 0.282676 | 1.464363 | 0.000763 | 0.011367 | 0.008575 |
| GO-BP | GO:0046660 | female sex differentiation                                            | 112 | 0.374953 | 1.666524 | 0.000764 | 0.011367 | 0.008575 |
| GO-BP | GO:0001655 | urogenital system development                                         | 325 | 0.292608 | 1.493066 | 0.000764 | 0.011367 | 0.008575 |
| GO-BP | GO:0048747 | muscle fiber development                                              | 67  | 0.462564 | 1.871635 | 0.000764 | 0.011367 | 0.008575 |
| GO-BP | GO:0032147 | activation of protein kinase activity                                 | 318 | 0.294516 | 1.499019 | 0.000765 | 0.011367 | 0.008575 |
| GO-BP | GO:0098693 | regulation of synaptic vesicle cycle                                  | 109 | 0.380214 | 1.68155  | 0.000765 | 0.011367 | 0.008575 |
| GO-BP | GO:0032102 | negative regulation of response to external stimulus                  | 317 | 0.298018 | 1.516164 | 0.000766 | 0.011367 | 0.008575 |
| GO-BP | GO:0030810 | positive regulation of nucleotide biosynthetic process                | 44  | 0.520602 | 1.925331 | 0.000767 | 0.011367 | 0.008575 |
| GO-BP | GO:1900373 | positive regulation of purine nucleotide biosynthetic process         | 44  | 0.520602 | 1.925331 | 0.000767 | 0.011367 | 0.008575 |
| GO-BP | GO:0007612 | learning                                                              | 142 | 0.362558 | 1.666643 | 0.000768 | 0.011374 | 0.00858  |
| GO-BP | GO:0006338 | chromatin remodeling                                                  | 170 | -0.34406 | -1.63215 | 0.000839 | 0.012277 | 0.009262 |
| GO-BP | GO:1902850 | microtubule cytoskeleton organization involved in mitosis             | 126 | -0.3812  | -1.72735 | 0.000839 | 0.012277 | 0.009262 |
| GO-BP | GO:0051304 | chromosome separation                                                 | 87  | -0.42668 | -1.8217  | 0.00084  | 0.012277 | 0.009262 |
| GO-BP | GO:0070507 | regulation of microtubule cytoskeleton organization                   | 178 | -0.33943 | -1.61996 | 0.000841 | 0.012277 | 0.009262 |
| GO-BP | GO:0043967 | histone H4 acetylation                                                | 65  | -0.44439 | -1.79719 | 0.000841 | 0.012277 | 0.009262 |
| GO-BP | GO:0010569 | regulation of double-strand break repair via homologous recombination | 43  | -0.49588 | -1.84353 | 0.000842 | 0.012277 | 0.009262 |
| GO-BP | GO:0006418 | tRNA aminoacylation for protein translation                           | 41  | -0.50594 | -1.8607  | 0.000843 | 0.012277 | 0.009262 |
| GO-BP | GO:0000018 | regulation of DNA recombination                                       | 99  | -0.40403 | -1.76573 | 0.000844 | 0.012277 | 0.009262 |
| GO-BP | GO:0006271 | DNA strand elongation involved in DNA replication                     | 20  | -0.66095 | -2.04239 | 0.000846 | 0.012277 | 0.009262 |

|       |            |                                                                                            |     |          |          |          |          |          |
|-------|------------|--------------------------------------------------------------------------------------------|-----|----------|----------|----------|----------|----------|
| GO-BP | GO:0006303 | double-strand break repair via nonhomologous end joining                                   | 76  | -0.41938 | -1.74483 | 0.000848 | 0.012277 | 0.009262 |
| GO-BP | GO:0019240 | citulline biosynthetic process                                                             | 5   | -0.90037 | -1.84684 | 0.000851 | 0.012277 | 0.009262 |
| GO-BP | GO:0110011 | regulation of basement membrane organization                                               | 5   | -0.90442 | -1.85514 | 0.000851 | 0.012277 | 0.009262 |
| GO-BP | GO:1904259 | regulation of basement membrane assembly involved in embryonic body morphogenesis          | 5   | -0.90442 | -1.85514 | 0.000851 | 0.012277 | 0.009262 |
| GO-BP | GO:1904261 | positive regulation of basement membrane assembly involved in embryonic body morphogenesis | 5   | -0.90442 | -1.85514 | 0.000851 | 0.012277 | 0.009262 |
| GO-BP | GO:2001197 | basement membrane assembly involved in embryonic body morphogenesis                        | 5   | -0.90442 | -1.85514 | 0.000851 | 0.012277 | 0.009262 |
| GO-BP | GO:0015677 | copper ion import                                                                          | 6   | 0.8557   | 1.804053 | 0.000942 | 0.013272 | 0.010013 |
| GO-BP | GO:0038156 | interleukin-3-mediated signaling pathway                                                   | 5   | 0.904512 | 1.791947 | 0.000944 | 0.013272 | 0.010013 |
| GO-BP | GO:0008202 | steroid metabolic process                                                                  | 305 | 0.294134 | 1.49368  | 0.000944 | 0.013272 | 0.010013 |
| GO-BP | GO:0001964 | startle response                                                                           | 26  | 0.584637 | 1.900396 | 0.000946 | 0.013272 | 0.010013 |
| GO-BP | GO:0055003 | cardiac myofibril assembly                                                                 | 26  | 0.584721 | 1.900667 | 0.000946 | 0.013272 | 0.010013 |
| GO-BP | GO:0045410 | positive regulation of interleukin-6 biosynthetic process                                  | 15  | 0.679102 | 1.908866 | 0.000947 | 0.013272 | 0.010013 |
| GO-BP | GO:0050731 | positive regulation of peptidyl-tyrosine phosphorylation                                   | 180 | 0.327777 | 1.559259 | 0.000948 | 0.013272 | 0.010013 |
| GO-BP | GO:0051235 | maintenance of location                                                                    | 309 | 0.298557 | 1.516938 | 0.000949 | 0.013272 | 0.010013 |
| GO-BP | GO:0001963 | synaptic transmission, dopaminergic                                                        | 25  | 0.609109 | 1.958817 | 0.000949 | 0.013272 | 0.010013 |
| GO-BP | GO:0090025 | regulation of monocyte chemotaxis                                                          | 25  | 0.595523 | 1.915126 | 0.000949 | 0.013272 | 0.010013 |
| GO-BP | GO:0050796 | regulation of insulin secretion                                                            | 175 | 0.331068 | 1.568411 | 0.00095  | 0.013272 | 0.010013 |
| GO-BP | GO:0006957 | complement activation, alternative pathway                                                 | 14  | 0.683051 | 1.87538  | 0.000951 | 0.013272 | 0.010013 |
| GO-BP | GO:0034370 | triglyceride-rich lipoprotein particle remodeling                                          | 14  | 0.684845 | 1.880304 | 0.000951 | 0.013272 | 0.010013 |
| GO-BP | GO:0045824 | negative regulation of innate immune response                                              | 54  | 0.450527 | 1.744761 | 0.000952 | 0.013272 | 0.010013 |
| GO-BP | GO:0034219 | carbohydrate transmembrane transport                                                       | 106 | 0.381521 | 1.681206 | 0.000952 | 0.013272 | 0.010013 |
| GO-BP | GO:0016101 | diterpenoid metabolic process                                                              | 98  | 0.393822 | 1.710259 | 0.000952 | 0.013272 | 0.010013 |
| GO-BP | GO:0046545 | development of primary female sexual characteristics                                       | 98  | 0.39253  | 1.704649 | 0.000952 | 0.013272 | 0.010013 |
| GO-BP | GO:0048771 | tissue remodeling                                                                          | 162 | 0.347141 | 1.627526 | 0.000954 | 0.013272 | 0.010013 |
| GO-BP | GO:0055078 | sodium ion homeostasis                                                                     | 51  | 0.473705 | 1.811717 | 0.000955 | 0.013272 | 0.010013 |
| GO-BP | GO:0006801 | superoxide metabolic process                                                               | 67  | 0.451377 | 1.826368 | 0.000955 | 0.013272 | 0.010013 |
| GO-BP | GO:0015872 | dopamine transport                                                                         | 46  | 0.50216  | 1.87753  | 0.000955 | 0.013272 | 0.010013 |
| GO-BP | GO:0001503 | ossification                                                                               | 369 | 0.284111 | 1.470548 | 0.000956 | 0.013272 | 0.010013 |

|       |            |                                                                                              |     |          |          |          |          |          |
|-------|------------|----------------------------------------------------------------------------------------------|-----|----------|----------|----------|----------|----------|
| GO-BP | GO:0048638 | regulation of developmental growth                                                           | 316 | 0.287725 | 1.463223 | 0.000956 | 0.013272 | 0.010013 |
| GO-BP | GO:0048489 | synaptic vesicle transport                                                                   | 145 | 0.35638  | 1.644551 | 0.000959 | 0.013272 | 0.010013 |
| GO-BP | GO:0097480 | establishment of synaptic vesicle localization                                               | 145 | 0.35638  | 1.644551 | 0.000959 | 0.013272 | 0.010013 |
| GO-BP | GO:0033619 | membrane protein proteolysis                                                                 | 58  | 0.45214  | 1.77595  | 0.000959 | 0.013272 | 0.010013 |
| GO-BP | GO:0002562 | somatic diversification of immune receptors via germline recombination within a single locus | 61  | -0.44479 | -1.77933 | 0.001046 | 0.014426 | 0.010883 |
| GO-BP | GO:0016444 | somatic cell DNA recombination                                                               | 61  | -0.44479 | -1.77933 | 0.001046 | 0.014426 | 0.010883 |
| GO-BP | GO:0006417 | regulation of translation                                                                    | 318 | -0.28433 | -1.45861 | 0.001048 | 0.01443  | 0.010886 |
| GO-BP | GO:0030490 | maturation of SSU-rRNA                                                                       | 45  | -0.50378 | -1.89101 | 0.00105  | 0.014432 | 0.010887 |
| GO-BP | GO:0040029 | regulation of gene expression, epigenetic                                                    | 322 | -0.28299 | -1.45269 | 0.001051 | 0.014432 | 0.010887 |
| GO-BP | GO:0043486 | histone exchange                                                                             | 50  | -0.49566 | -1.8966  | 0.001053 | 0.014432 | 0.010887 |
| GO-BP | GO:0031573 | intra-S DNA damage checkpoint                                                                | 15  | -0.70895 | -2.01895 | 0.001059 | 0.014484 | 0.010927 |
| GO-BP | GO:0030217 | T cell differentiation                                                                       | 232 | -0.31587 | -1.55883 | 0.00106  | 0.014484 | 0.010927 |
| GO-BP | GO:0060896 | neural plate pattern specification                                                           | 8   | -0.80613 | -1.9034  | 0.001063 | 0.014504 | 0.010942 |
| GO-BP | GO:0042110 | T cell activation                                                                            | 444 | -0.26511 | -1.40903 | 0.001069 | 0.014556 | 0.010981 |
| GO-BP | GO:0090066 | regulation of anatomical structure size                                                      | 484 | 0.264616 | 1.409766 | 0.001122 | 0.015045 | 0.01135  |
| GO-BP | GO:0033500 | carbohydrate homeostasis                                                                     | 228 | 0.306918 | 1.506621 | 0.001128 | 0.015045 | 0.01135  |
| GO-BP | GO:0090257 | regulation of muscle system process                                                          | 227 | 0.307397 | 1.508605 | 0.001129 | 0.015045 | 0.01135  |
| GO-BP | GO:0032692 | negative regulation of interleukin-1 production                                              | 28  | 0.587622 | 1.949147 | 0.001133 | 0.015045 | 0.01135  |
| GO-BP | GO:0001709 | cell fate determination                                                                      | 38  | 0.544049 | 1.951896 | 0.001136 | 0.015045 | 0.01135  |
| GO-BP | GO:0090026 | positive regulation of monocyte chemotaxis                                                   | 18  | 0.631525 | 1.866846 | 0.001136 | 0.015045 | 0.01135  |
| GO-BP | GO:0006825 | copper ion transport                                                                         | 16  | 0.661286 | 1.889702 | 0.001137 | 0.015045 | 0.01135  |
| GO-BP | GO:2001170 | negative regulation of ATP biosynthetic process                                              | 16  | 0.654842 | 1.871285 | 0.001137 | 0.015045 | 0.01135  |
| GO-BP | GO:0035235 | ionotropic glutamate receptor signaling pathway                                              | 24  | 0.617277 | 1.968161 | 0.001138 | 0.015045 | 0.01135  |
| GO-BP | GO:1904861 | excitatory synapse assembly                                                                  | 24  | 0.614868 | 1.96048  | 0.001138 | 0.015045 | 0.01135  |
| GO-BP | GO:0042246 | tissue regeneration                                                                          | 70  | 0.425506 | 1.737345 | 0.001139 | 0.015045 | 0.01135  |
| GO-BP | GO:0007411 | axon guidance                                                                                | 267 | 0.302499 | 1.511522 | 0.001139 | 0.015045 | 0.01135  |
| GO-BP | GO:2001257 | regulation of cation channel activity                                                        | 163 | 0.344841 | 1.619198 | 0.00114  | 0.015045 | 0.01135  |
| GO-BP | GO:0002548 | monocyte chemotaxis                                                                          | 56  | 0.450478 | 1.758932 | 0.001141 | 0.015045 | 0.01135  |
| GO-BP | GO:0043277 | apoptotic cell clearance                                                                     | 41  | 0.521711 | 1.900477 | 0.001142 | 0.015045 | 0.01135  |
| GO-BP | GO:0050433 | regulation of catecholamine secretion                                                        | 54  | 0.450201 | 1.743498 | 0.001142 | 0.015045 | 0.01135  |
| GO-BP | GO:0051193 | regulation of cofactor metabolic process                                                     | 115 | 0.366728 | 1.637806 | 0.001142 | 0.015045 | 0.01135  |
| GO-BP | GO:0032488 | Cdc42 protein signal transduction                                                            | 13  | 0.703348 | 1.88675  | 0.001143 | 0.015045 | 0.01135  |
| GO-BP | GO:0001892 | embryonic placenta development                                                               | 85  | 0.41695  | 1.762569 | 0.001145 | 0.015045 | 0.01135  |
| GO-BP | GO:0031279 | regulation of cyclase activity                                                               | 42  | 0.515885 | 1.891178 | 0.001145 | 0.015045 | 0.01135  |
| GO-BP | GO:0045773 | positive regulation of axon extension                                                        | 42  | 0.516273 | 1.8926   | 0.001145 | 0.015045 | 0.01135  |

|       |            |                                                        |     |          |          |          |          |          |
|-------|------------|--------------------------------------------------------|-----|----------|----------|----------|----------|----------|
| GO-BP | GO:0071675 | regulation of mononuclear cell migration               | 46  | 0.492308 | 1.840694 | 0.001147 | 0.015045 | 0.01135  |
| GO-BP | GO:0001822 | kidney development                                     | 274 | 0.297553 | 1.491964 | 0.001147 | 0.015045 | 0.01135  |
| GO-BP | GO:0002065 | columnar/cuboidal epithelial cell differentiation      | 110 | 0.371003 | 1.644018 | 0.001148 | 0.015045 | 0.01135  |
| GO-BP | GO:0048754 | branching morphogenesis of an epithelial tube          | 146 | 0.353898 | 1.635274 | 0.001148 | 0.015045 | 0.01135  |
| GO-BP | GO:0042446 | hormone biosynthetic process                           | 82  | 0.422772 | 1.775044 | 0.001149 | 0.015045 | 0.01135  |
| GO-BP | GO:0006639 | acylglycerol metabolic process                         | 118 | 0.369249 | 1.650643 | 0.001153 | 0.015062 | 0.011363 |
| GO-BP | GO:0043966 | histone H3 acetylation                                 | 57  | -0.46663 | -1.84205 | 0.001257 | 0.016364 | 0.012345 |
| GO-BP | GO:0006405 | RNA export from nucleus                                | 123 | -0.36905 | -1.66707 | 0.001262 | 0.016364 | 0.012345 |
| GO-BP | GO:0006297 | nucleotide-excision repair, DNA gap filling            | 23  | -0.61094 | -1.95737 | 0.001267 | 0.016364 | 0.012345 |
| GO-BP | GO:0002836 | positive regulation of response to tumor cell          | 11  | -0.76386 | -1.98378 | 0.001268 | 0.016364 | 0.012345 |
| GO-BP | GO:0002839 | positive regulation of immune response to tumor cell   | 11  | -0.76386 | -1.98378 | 0.001268 | 0.016364 | 0.012345 |
| GO-BP | GO:0002295 | T-helper cell lineage commitment                       | 16  | -0.67297 | -1.94798 | 0.001269 | 0.016364 | 0.012345 |
| GO-BP | GO:0036124 | histone H3-K9 trimethylation                           | 16  | -0.6802  | -1.96889 | 0.001269 | 0.016364 | 0.012345 |
| GO-BP | GO:2001252 | positive regulation of chromosome organization         | 167 | -0.33322 | -1.57612 | 0.00127  | 0.016364 | 0.012345 |
| GO-BP | GO:2000779 | regulation of double-strand break repair               | 72  | -0.42301 | -1.74319 | 0.001271 | 0.016364 | 0.012345 |
| GO-BP | GO:0034080 | CENP-A containing nucleosome assembly                  | 34  | -0.54843 | -1.92987 | 0.001273 | 0.016364 | 0.012345 |
| GO-BP | GO:0061641 | CENP-A containing chromatin organization               | 34  | -0.54843 | -1.92987 | 0.001273 | 0.016364 | 0.012345 |
| GO-BP | GO:0072511 | divalent inorganic cation transport                    | 465 | 0.26909  | 1.427324 | 0.001311 | 0.016753 | 0.012638 |
| GO-BP | GO:0031348 | negative regulation of defense response                | 196 | 0.31689  | 1.525181 | 0.001321 | 0.016753 | 0.012638 |
| GO-BP | GO:1901201 | regulation of extracellular matrix assembly            | 9   | 0.776385 | 1.858677 | 0.001321 | 0.016753 | 0.012638 |
| GO-BP | GO:0045137 | development of primary sexual characteristics          | 210 | 0.314614 | 1.528238 | 0.001323 | 0.016753 | 0.012638 |
| GO-BP | GO:0002064 | epithelial cell development                            | 204 | 0.313952 | 1.520363 | 0.001324 | 0.016753 | 0.012638 |
| GO-BP | GO:0008406 | gonad development                                      | 204 | 0.312959 | 1.515555 | 0.001324 | 0.016753 | 0.012638 |
| GO-BP | GO:0048738 | cardiac muscle tissue development                      | 205 | 0.316724 | 1.534263 | 0.001325 | 0.016753 | 0.012638 |
| GO-BP | GO:0051195 | negative regulation of cofactor metabolic process      | 22  | 0.624004 | 1.945778 | 0.001326 | 0.016753 | 0.012638 |
| GO-BP | GO:0072001 | renal system development                               | 289 | 0.294971 | 1.488119 | 0.001327 | 0.016753 | 0.012638 |
| GO-BP | GO:0001774 | microglial cell activation                             | 41  | 0.518234 | 1.88781  | 0.001332 | 0.016753 | 0.012638 |
| GO-BP | GO:0002269 | leukocyte activation involved in inflammatory response | 41  | 0.518234 | 1.88781  | 0.001332 | 0.016753 | 0.012638 |
| GO-BP | GO:0071825 | protein-lipid complex subunit                          | 47  | 0.483396 | 1.816204 | 0.001336 | 0.016753 | 0.012638 |

|       |            |                                         |     |          |          |          |          |          |
|-------|------------|-----------------------------------------|-----|----------|----------|----------|----------|----------|
|       |            | organization                            |     |          |          |          |          |          |
| GO-BP | GO:1903317 | regulation of protein maturation        | 116 | 0.365391 | 1.632931 | 0.001336 | 0.016753 | 0.012638 |
| GO-BP | GO:0034763 | negative regulation of transmembrane    | 108 | 0.373887 | 1.65176  | 0.001336 | 0.016753 | 0.012638 |
|       |            | transport                               |     |          |          |          |          |          |
| GO-BP | GO:0060048 | cardiac muscle contraction              | 127 | 0.358287 | 1.620801 | 0.001336 | 0.016753 | 0.012638 |
| GO-BP | GO:0030199 | collagen fibril organization            | 51  | 0.460408 | 1.760861 | 0.001337 | 0.016753 | 0.012638 |
| GO-BP | GO:0071384 | cellular response to corticosteroid     | 60  | 0.438017 | 1.73343  | 0.001339 | 0.016753 | 0.012638 |
|       |            | stimulus                                |     |          |          |          |          |          |
| GO-BP | GO:0006584 | catecholamine metabolic process         | 49  | 0.470661 | 1.783023 | 0.00134  | 0.016753 | 0.012638 |
| GO-BP | GO:0009712 | catechol-containing compound            | 49  | 0.470661 | 1.783023 | 0.00134  | 0.016753 | 0.012638 |
|       |            | metabolic process                       |     |          |          |          |          |          |
| GO-BP | GO:0006937 | regulation of muscle contraction        | 157 | 0.346643 | 1.618614 | 0.001342 | 0.016753 | 0.012638 |
| GO-BP | GO:0030879 | mammary gland development               | 136 | 0.355975 | 1.625606 | 0.001346 | 0.016786 | 0.012664 |
| GO-BP | GO:0090501 | RNA phosphodiester bond hydrolysis      | 136 | -0.35033 | -1.60749 | 0.001458 | 0.017954 | 0.013545 |
| GO-BP | GO:0009116 | nucleoside metabolic process            | 117 | -0.37341 | -1.67683 | 0.001464 | 0.017954 | 0.013545 |
| GO-BP | GO:0071166 | ribonucleoprotein complex               | 116 | -0.37279 | -1.67135 | 0.00147  | 0.017954 | 0.013545 |
|       |            | localization                            |     |          |          |          |          |          |
| GO-BP | GO:0006342 | chromatin silencing                     | 98  | -0.39388 | -1.71922 | 0.001473 | 0.017954 | 0.013545 |
| GO-BP | GO:0000727 | double-strand break repair via          | 11  | -0.7592  | -1.97169 | 0.00148  | 0.017954 | 0.013545 |
|       |            | break-induced replication               |     |          |          |          |          |          |
| GO-BP | GO:2000001 | regulation of DNA damage                | 15  | -0.6936  | -1.97523 | 0.001482 | 0.017954 | 0.013545 |
|       |            | checkpoint                              |     |          |          |          |          |          |
| GO-BP | GO:0045911 | positive regulation of DNA              | 38  | -0.52013 | -1.87682 | 0.001483 | 0.017954 | 0.013545 |
|       |            | recombination                           |     |          |          |          |          |          |
| GO-BP | GO:0002717 | positive regulation of natural killer   | 29  | -0.58352 | -1.97707 | 0.001484 | 0.017954 | 0.013545 |
|       |            | cell mediated immunity                  |     |          |          |          |          |          |
| GO-BP | GO:0007018 | microtubule-based movement              | 271 | -0.29377 | -1.4796  | 0.001484 | 0.017954 | 0.013545 |
| GO-BP | GO:0007094 | mitotic spindle assembly checkpoint     | 34  | -0.54603 | -1.92142 | 0.001485 | 0.017954 | 0.013545 |
| GO-BP | GO:0031577 | spindle checkpoint                      | 34  | -0.54603 | -1.92142 | 0.001485 | 0.017954 | 0.013545 |
| GO-BP | GO:0071173 | spindle assembly checkpoint             | 34  | -0.54603 | -1.92142 | 0.001485 | 0.017954 | 0.013545 |
| GO-BP | GO:0071174 | mitotic spindle checkpoint              | 34  | -0.54603 | -1.92142 | 0.001485 | 0.017954 | 0.013545 |
| GO-BP | GO:1904124 | microglial cell migration               | 6   | -0.85191 | -1.84991 | 0.001491 | 0.017954 | 0.013545 |
| GO-BP | GO:1904139 | regulation of microglial cell migration | 6   | -0.85191 | -1.84991 | 0.001491 | 0.017954 | 0.013545 |
| GO-BP | GO:0045785 | positive regulation of cell adhesion    | 389 | 0.274132 | 1.429951 | 0.001502 | 0.017954 | 0.013545 |
| GO-BP | GO:0042593 | glucose homeostasis                     | 227 | 0.304488 | 1.494326 | 0.001506 | 0.017954 | 0.013545 |
| GO-BP | GO:0090385 | phagosome-lysosome fusion               | 7   | 0.827488 | 1.833603 | 0.001506 | 0.017954 | 0.013545 |
| GO-BP | GO:0099068 | postsynapse assembly                    | 30  | 0.544278 | 1.841255 | 0.001507 | 0.017954 | 0.013545 |
| GO-BP | GO:0015682 | ferric iron transport                   | 37  | 0.542044 | 1.932894 | 0.001509 | 0.017954 | 0.013545 |
| GO-BP | GO:0072512 | trivalent inorganic cation transport    | 37  | 0.542044 | 1.932894 | 0.001509 | 0.017954 | 0.013545 |
| GO-BP | GO:0007263 | nitric oxide mediated signal            | 28  | 0.554658 | 1.839806 | 0.00151  | 0.017954 | 0.013545 |
|       |            | transduction                            |     |          |          |          |          |          |
| GO-BP | GO:0010873 | positive regulation of cholesterol      | 9   | 0.775151 | 1.855723 | 0.00151  | 0.017954 | 0.013545 |
|       |            | esterification                          |     |          |          |          |          |          |
| GO-BP | GO:0034368 | protein-lipid complex remodeling        | 28  | 0.555039 | 1.84107  | 0.00151  | 0.017954 | 0.013545 |

|       |            |                                                                        |     |          |          |          |          |          |
|-------|------------|------------------------------------------------------------------------|-----|----------|----------|----------|----------|----------|
| GO-BP | GO:0034369 | plasma lipoprotein particle remodeling                                 | 28  | 0.555039 | 1.84107  | 0.00151  | 0.017954 | 0.013545 |
| GO-BP | GO:0009612 | response to mechanical stimulus                                        | 203 | 0.307874 | 1.489974 | 0.001511 | 0.017954 | 0.013545 |
| GO-BP | GO:0019216 | regulation of lipid metabolic process                                  | 379 | 0.275692 | 1.433355 | 0.001513 | 0.017954 | 0.013545 |
| GO-BP | GO:0032928 | regulation of superoxide anion generation                              | 22  | 0.609287 | 1.899887 | 0.001516 | 0.017954 | 0.013545 |
| GO-BP | GO:0015721 | bile acid and bile salt transport                                      | 25  | 0.586828 | 1.887166 | 0.001518 | 0.017954 | 0.013545 |
| GO-BP | GO:0070613 | regulation of protein processing                                       | 114 | 0.361023 | 1.611665 | 0.001519 | 0.017954 | 0.013545 |
| GO-BP | GO:0032930 | positive regulation of superoxide anion generation                     | 19  | 0.627076 | 1.87893  | 0.00152  | 0.017954 | 0.013545 |
| GO-BP | GO:0043523 | regulation of neuron apoptotic process                                 | 199 | 0.310175 | 1.494803 | 0.00152  | 0.017954 | 0.013545 |
| GO-BP | GO:0050909 | sensory perception of taste                                            | 56  | 0.445114 | 1.737986 | 0.001521 | 0.017954 | 0.013545 |
| GO-BP | GO:0046461 | neutral lipid catabolic process                                        | 41  | 0.508961 | 1.854032 | 0.001522 | 0.017954 | 0.013545 |
| GO-BP | GO:0046464 | acylglycerol catabolic process                                         | 41  | 0.508961 | 1.854032 | 0.001522 | 0.017954 | 0.013545 |
| GO-BP | GO:0051602 | response to electrical stimulus                                        | 43  | 0.503476 | 1.85509  | 0.001524 | 0.017954 | 0.013545 |
| GO-BP | GO:0015749 | monosaccharide transmembrane transport                                 | 104 | 0.372884 | 1.636466 | 0.001524 | 0.017954 | 0.013545 |
| GO-BP | GO:0046890 | regulation of lipid biosynthetic process                               | 179 | 0.326542 | 1.550514 | 0.001524 | 0.017954 | 0.013545 |
| GO-BP | GO:0071248 | cellular response to metal ion                                         | 179 | 0.32619  | 1.54884  | 0.001524 | 0.017954 | 0.013545 |
| GO-BP | GO:0030239 | myofibril assembly                                                     | 69  | 0.423626 | 1.72293  | 0.001526 | 0.017954 | 0.013545 |
| GO-BP | GO:0046888 | negative regulation of hormone secretion                               | 66  | 0.433699 | 1.749422 | 0.001526 | 0.017954 | 0.013545 |
| GO-BP | GO:2000177 | regulation of neural precursor cell proliferation                      | 85  | 0.402384 | 1.700994 | 0.001526 | 0.017954 | 0.013545 |
| GO-BP | GO:0033273 | response to vitamin                                                    | 88  | 0.40403  | 1.718835 | 0.001531 | 0.017978 | 0.013562 |
| GO-BP | GO:0097006 | regulation of plasma lipoprotein particle levels                       | 82  | 0.408805 | 1.716403 | 0.001533 | 0.017978 | 0.013562 |
| GO-BP | GO:0016573 | histone acetylation                                                    | 149 | -0.35462 | -1.64827 | 0.001667 | 0.019466 | 0.014685 |
| GO-BP | GO:0000726 | non-recombinational repair                                             | 82  | -0.40528 | -1.71509 | 0.001673 | 0.019466 | 0.014685 |
| GO-BP | GO:0000956 | nuclear-transcribed mRNA catabolic process                             | 183 | -0.3254  | -1.55697 | 0.001682 | 0.019466 | 0.014685 |
| GO-BP | GO:0071426 | ribonucleoprotein complex export from nucleus                          | 115 | -0.36863 | -1.64874 | 0.001685 | 0.019466 | 0.014685 |
| GO-BP | GO:0031295 | T cell costimulation                                                   | 54  | -0.46645 | -1.81552 | 0.001685 | 0.019466 | 0.014685 |
| GO-BP | GO:0070838 | divalent metal ion transport                                           | 459 | 0.266379 | 1.411258 | 0.001694 | 0.019466 | 0.014685 |
| GO-BP | GO:0042417 | dopamine metabolic process                                             | 37  | 0.523837 | 1.86797  | 0.001698 | 0.019466 | 0.014685 |
| GO-BP | GO:0050912 | detection of chemical stimulus involved in sensory perception of taste | 37  | 0.534566 | 1.906229 | 0.001698 | 0.019466 | 0.014685 |
| GO-BP | GO:0006003 | fructose 2,6-bisphosphate metabolic process                            | 5   | 0.890536 | 1.76426  | 0.001698 | 0.019466 | 0.014685 |
| GO-BP | GO:0070487 | monocyte aggregation                                                   | 5   | 0.882695 | 1.748725 | 0.001698 | 0.019466 | 0.014685 |
| GO-BP | GO:0098532 | histone H3-K27 trimethylation                                          | 7   | -0.82359 | -1.87075 | 0.001705 | 0.019466 | 0.014685 |

|       |            |                                                          |     |          |          |          |          |          |
|-------|------------|----------------------------------------------------------|-----|----------|----------|----------|----------|----------|
| GO-BP | GO:1904667 | negative regulation of ubiquitin protein ligase activity | 7   | -0.82481 | -1.8735  | 0.001705 | 0.019466 | 0.014685 |
| GO-BP | GO:0042509 | regulation of tyrosine phosphorylation of STAT protein   | 78  | 0.404454 | 1.687104 | 0.001707 | 0.019466 | 0.014685 |
| GO-BP | GO:0016311 | dephosphorylation                                        | 460 | -0.25954 | -1.38342 | 0.001708 | 0.019466 | 0.014685 |
| GO-BP | GO:0060669 | embryonic placenta morphogenesis                         | 25  | 0.573303 | 1.843669 | 0.001708 | 0.019466 | 0.014685 |
| GO-BP | GO:0008645 | hexose transmembrane transport                           | 102 | 0.377287 | 1.649796 | 0.001708 | 0.019466 | 0.014685 |
| GO-BP | GO:0048562 | embryonic organ morphogenesis                            | 280 | 0.28976  | 1.457308 | 0.001709 | 0.019466 | 0.014685 |
| GO-BP | GO:0001657 | ureteric bud development                                 | 97  | 0.383439 | 1.661761 | 0.001714 | 0.019466 | 0.014685 |
| GO-BP | GO:0022600 | digestive system process                                 | 97  | 0.382579 | 1.658034 | 0.001714 | 0.019466 | 0.014685 |
| GO-BP | GO:0072163 | mesonephric epithelium development                       | 97  | 0.383439 | 1.661761 | 0.001714 | 0.019466 | 0.014685 |
| GO-BP | GO:0072164 | mesonephric tubule development                           | 97  | 0.383439 | 1.661761 | 0.001714 | 0.019466 | 0.014685 |
| GO-BP | GO:0048661 | positive regulation of smooth muscle cell proliferation  | 84  | 0.406825 | 1.716306 | 0.001714 | 0.019466 | 0.014685 |
| GO-BP | GO:0071242 | cellular response to ammonium ion                        | 63  | 0.43512  | 1.738841 | 0.001714 | 0.019466 | 0.014685 |
| GO-BP | GO:0010876 | lipid localization                                       | 368 | 0.278115 | 1.439585 | 0.001716 | 0.019466 | 0.014685 |
| GO-BP | GO:0051952 | regulation of amine transport                            | 87  | 0.40192  | 1.707637 | 0.001717 | 0.019466 | 0.014685 |
| GO-BP | GO:0002040 | sprouting angiogenesis                                   | 112 | 0.364432 | 1.619763 | 0.001719 | 0.019466 | 0.014685 |
| GO-BP | GO:0002067 | glandular epithelial cell differentiation                | 46  | 0.487344 | 1.822134 | 0.00172  | 0.019466 | 0.014685 |
| GO-BP | GO:0097696 | STAT cascade                                             | 147 | 0.345913 | 1.599934 | 0.001723 | 0.019468 | 0.014687 |
| GO-BP | GO:0046717 | acid secretion                                           | 117 | 0.359256 | 1.605686 | 0.001724 | 0.019468 | 0.014687 |
| GO-BP | GO:0006475 | internal protein amino acid acetylation                  | 158 | -0.34298 | -1.61044 | 0.001877 | 0.020899 | 0.015766 |
| GO-BP | GO:0050900 | leukocyte migration                                      | 422 | 0.264271 | 1.388309 | 0.001878 | 0.020899 | 0.015766 |
| GO-BP | GO:0050730 | regulation of peptidyl-tyrosine phosphorylation          | 241 | 0.298915 | 1.477172 | 0.001882 | 0.020899 | 0.015766 |
| GO-BP | GO:0015824 | proline transport                                        | 7   | 0.820481 | 1.818077 | 0.001883 | 0.020899 | 0.015766 |
| GO-BP | GO:0001558 | regulation of cell growth                                | 390 | 0.272576 | 1.420875 | 0.001886 | 0.020899 | 0.015766 |
| GO-BP | GO:0045907 | positive regulation of vasoconstriction                  | 31  | 0.541489 | 1.848952 | 0.001887 | 0.020899 | 0.015766 |
| GO-BP | GO:0003156 | regulation of animal organ formation                     | 35  | 0.516142 | 1.815058 | 0.00189  | 0.020899 | 0.015766 |
| GO-BP | GO:0010573 | vascular endothelial growth factor production            | 35  | 0.530939 | 1.867091 | 0.00189  | 0.020899 | 0.015766 |
| GO-BP | GO:0033572 | transferrin transport                                    | 35  | 0.527013 | 1.853285 | 0.00189  | 0.020899 | 0.015766 |
| GO-BP | GO:0042554 | superoxide anion generation                              | 35  | 0.519324 | 1.826249 | 0.00189  | 0.020899 | 0.015766 |
| GO-BP | GO:0097107 | postsynaptic density assembly                            | 17  | 0.632968 | 1.840308 | 0.001891 | 0.020899 | 0.015766 |
| GO-BP | GO:0032409 | regulation of transporter activity                       | 263 | 0.296549 | 1.480864 | 0.001894 | 0.020899 | 0.015766 |
| GO-BP | GO:0045408 | regulation of interleukin-6 biosynthetic process         | 22  | 0.601667 | 1.876125 | 0.001895 | 0.020899 | 0.015766 |
| GO-BP | GO:0030813 | positive regulation of nucleotide catabolic process      | 24  | 0.577828 | 1.84238  | 0.001896 | 0.020899 | 0.015766 |
| GO-BP | GO:0051197 | positive regulation of coenzyme metabolic process        | 24  | 0.577828 | 1.84238  | 0.001896 | 0.020899 | 0.015766 |
| GO-BP | GO:0001823 | mesonephros development                                  | 101 | 0.378366 | 1.650241 | 0.001898 | 0.020899 | 0.015766 |
| GO-BP | GO:0006413 | translational initiation                                 | 167 | -0.32816 | -1.55216 | 0.001904 | 0.020899 | 0.015766 |



|       |            |                                                                                         |     |          |          |          |          |          |
|-------|------------|-----------------------------------------------------------------------------------------|-----|----------|----------|----------|----------|----------|
| GO-BP | GO:0042278 | purine nucleoside metabolic process                                                     | 73  | -0.4171  | -1.72281 | 0.001906 | 0.020899 | 0.015766 |
| GO-BP | GO:1904659 | glucose transmembrane transport                                                         | 100 | 0.377072 | 1.641352 | 0.001906 | 0.020899 | 0.015766 |
| GO-BP | GO:0001708 | cell fate specification                                                                 | 96  | 0.381267 | 1.65053  | 0.001906 | 0.020899 | 0.015766 |
| GO-BP | GO:0045841 | negative regulation of mitotic metaphase/anaphase transition                            | 36  | -0.52948 | -1.88885 | 0.001907 | 0.020899 | 0.015766 |
| GO-BP | GO:0010833 | telomere maintenance via telomere lengthening                                           | 76  | -0.40906 | -1.70191 | 0.001908 | 0.020899 | 0.015766 |
| GO-BP | GO:0000462 | maturaton of SSU-rRNA from tricistronic rRNA transcript (SSU-rRNA, 5.8S rRNA, LSU-rRNA) | 34  | -0.53385 | -1.87856 | 0.001909 | 0.020899 | 0.015766 |
| GO-BP | GO:0043271 | negative regulation of ion transport                                                    | 139 | 0.348631 | 1.598885 | 0.001914 | 0.020899 | 0.015766 |
| GO-BP | GO:1990845 | adaptive thermogenesis                                                                  | 151 | 0.339702 | 1.577325 | 0.001914 | 0.020899 | 0.015766 |
| GO-BP | GO:1903935 | response to sodium arsenite                                                             | 5   | -0.87517 | -1.79516 | 0.001914 | 0.020899 | 0.015766 |
| GO-BP | GO:0043382 | positive regulation of memory T cell differentiation                                    | 6   | -0.84644 | -1.83804 | 0.001917 | 0.020906 | 0.015771 |
| GO-BP | GO:0106106 | cold-induced thermogenesis                                                              | 141 | 0.351172 | 1.612342 | 0.001924 | 0.020906 | 0.015771 |
| GO-BP | GO:0120161 | regulation of cold-induced thermogenesis                                                | 141 | 0.351172 | 1.612342 | 0.001924 | 0.020906 | 0.015771 |
| GO-BP | GO:0051249 | regulation of lymphocyte activation                                                     | 407 | -0.26803 | -1.41149 | 0.001924 | 0.020906 | 0.015771 |
| GO-BP | GO:0050878 | regulation of body fluid levels                                                         | 477 | 0.26246  | 1.396321 | 0.002055 | 0.02226  | 0.016793 |
| GO-BP | GO:1904951 | positive regulation of establishment of protein localization                            | 433 | 0.266205 | 1.401975 | 0.002064 | 0.02226  | 0.016793 |
| GO-BP | GO:0070391 | response to lipoteichoic acid                                                           | 10  | 0.768874 | 1.909177 | 0.00207  | 0.02226  | 0.016793 |
| GO-BP | GO:0071223 | cellular response to lipoteichoic acid                                                  | 10  | 0.768874 | 1.909177 | 0.00207  | 0.02226  | 0.016793 |
| GO-BP | GO:0001974 | blood vessel remodeling                                                                 | 39  | 0.508239 | 1.834726 | 0.002075 | 0.02226  | 0.016793 |
| GO-BP | GO:0007341 | penetration of zona pellucida                                                           | 8   | 0.791114 | 1.824071 | 0.002076 | 0.02226  | 0.016793 |
| GO-BP | GO:0034372 | very-low-density lipoprotein particle remodeling                                        | 12  | 0.713471 | 1.871654 | 0.002083 | 0.02226  | 0.016793 |
| GO-BP | GO:0097028 | dendritic cell differentiation                                                          | 40  | 0.50205  | 1.822785 | 0.002084 | 0.02226  | 0.016793 |
| GO-BP | GO:0048143 | astrocyte activation                                                                    | 22  | 0.593663 | 1.85117  | 0.002084 | 0.02226  | 0.016793 |
| GO-BP | GO:0045821 | positive regulation of glycolytic process                                               | 23  | 0.585565 | 1.846672 | 0.002088 | 0.02226  | 0.016793 |
| GO-BP | GO:0007260 | tyrosine phosphorylation of STAT protein                                                | 80  | 0.400212 | 1.676817 | 0.00209  | 0.02226  | 0.016793 |
| GO-BP | GO:0018393 | internal peptidyl-lysine acetylation                                                    | 153 | -0.34241 | -1.59862 | 0.002091 | 0.02226  | 0.016793 |
| GO-BP | GO:0008585 | female gonad development                                                                | 93  | 0.390966 | 1.680262 | 0.002094 | 0.02226  | 0.016793 |
| GO-BP | GO:0021513 | spinal cord dorsal/ventral patterning                                                   | 21  | 0.603145 | 1.85395  | 0.002098 | 0.02226  | 0.016793 |
| GO-BP | GO:0042531 | positive regulation of tyrosine phosphorylation of STAT protein                         | 66  | 0.426962 | 1.722246 | 0.002099 | 0.02226  | 0.016793 |
| GO-BP | GO:0071300 | cellular response to retinoic acid                                                      | 66  | 0.425157 | 1.714967 | 0.002099 | 0.02226  | 0.016793 |
| GO-BP | GO:0033003 | regulation of mast cell activation                                                      | 42  | 0.500481 | 1.834708 | 0.002099 | 0.02226  | 0.016793 |
| GO-BP | GO:0016266 | O-glycan processing                                                                     | 59  | 0.434747 | 1.714699 | 0.0021   | 0.02226  | 0.016793 |
| GO-BP | GO:0000187 | activation of MAPK activity                                                             | 144 | 0.346395 | 1.598014 | 0.002101 | 0.02226  | 0.016793 |

|       |            |                                                                     |     |          |          |          |          |          |
|-------|------------|---------------------------------------------------------------------|-----|----------|----------|----------|----------|----------|
| GO-BP | GO:0090502 | RNA phosphodiester bond hydrolysis,<br>endonucleolytic              | 65  | -0.42    | -1.69855 | 0.002103 | 0.02226  | 0.016793 |
| GO-BP | GO:0045216 | cell-cell junction organization                                     | 152 | 0.33827  | 1.57154  | 0.002104 | 0.02226  | 0.016793 |
| GO-BP | GO:0090308 | regulation of methylation-dependent<br>chromatin silencing          | 13  | -0.71521 | -1.96123 | 0.002105 | 0.02226  | 0.016793 |
| GO-BP | GO:0043968 | histone H2A acetylation                                             | 16  | -0.65382 | -1.89255 | 0.002116 | 0.022343 | 0.016856 |
| GO-BP | GO:0006450 | regulation of translational fidelity                                | 18  | -0.63198 | -1.8916  | 0.002118 | 0.022343 | 0.016856 |
| GO-BP | GO:0045954 | positive regulation of natural killer<br>cell mediated cytotoxicity | 26  | -0.58237 | -1.92166 | 0.002121 | 0.022349 | 0.01686  |
| GO-BP | GO:0002370 | natural killer cell cytokine production                             | 7   | -0.81715 | -1.85612 | 0.002132 | 0.022355 | 0.016865 |
| GO-BP | GO:0002449 | lymphocyte mediated immunity                                        | 243 | -0.29904 | -1.48484 | 0.002132 | 0.022355 | 0.016865 |
| GO-BP | GO:0002727 | regulation of natural killer cell<br>cytokine production            | 7   | -0.81715 | -1.85612 | 0.002132 | 0.022355 | 0.016865 |
| GO-BP | GO:0030953 | astral microtubule organization                                     | 7   | -0.81593 | -1.85333 | 0.002132 | 0.022355 | 0.016865 |
| GO-BP | GO:1901991 | negative regulation of mitotic cell<br>cycle phase transition       | 217 | -0.30314 | -1.48234 | 0.002136 | 0.022376 | 0.01688  |
| GO-BP | GO:0003211 | cardiac ventricle formation                                         | 10  | 0.765723 | 1.901353 | 0.002258 | 0.023441 | 0.017684 |
| GO-BP | GO:0035376 | sterol import                                                       | 10  | 0.768121 | 1.907308 | 0.002258 | 0.023441 | 0.017684 |
| GO-BP | GO:0060174 | limb bud formation                                                  | 10  | 0.763315 | 1.895374 | 0.002258 | 0.023441 | 0.017684 |
| GO-BP | GO:0070508 | cholesterol import                                                  | 10  | 0.768121 | 1.907308 | 0.002258 | 0.023441 | 0.017684 |
| GO-BP | GO:0046466 | membrane lipid catabolic process                                    | 30  | 0.529811 | 1.792315 | 0.002261 | 0.023441 | 0.017684 |
| GO-BP | GO:0048845 | venous blood vessel morphogenesis                                   | 9   | 0.769213 | 1.841507 | 0.002265 | 0.023441 | 0.017684 |
| GO-BP | GO:0090049 | regulation of cell migration involved<br>in sprouting angiogenesis  | 40  | 0.497968 | 1.807966 | 0.002273 | 0.023441 | 0.017684 |
| GO-BP | GO:0006022 | aminoglycan metabolic process                                       | 168 | 0.327884 | 1.544827 | 0.002275 | 0.023441 | 0.017684 |
| GO-BP | GO:0032225 | regulation of synaptic transmission,<br>dopaminergic                | 16  | 0.638868 | 1.825638 | 0.002275 | 0.023441 | 0.017684 |
| GO-BP | GO:0050886 | endocrine process                                                   | 83  | 0.398521 | 1.679583 | 0.002275 | 0.023441 | 0.017684 |
| GO-BP | GO:0046677 | response to antibiotic                                              | 308 | 0.28271  | 1.435811 | 0.002279 | 0.023441 | 0.017684 |
| GO-BP | GO:0050432 | catecholamine secretion                                             | 56  | 0.433686 | 1.693364 | 0.002281 | 0.023441 | 0.017684 |
| GO-BP | GO:0060732 | positive regulation of inositol<br>phosphate biosynthetic process   | 14  | 0.671597 | 1.843931 | 0.002281 | 0.023441 | 0.017684 |
| GO-BP | GO:0031623 | receptor internalization                                            | 106 | 0.366382 | 1.614494 | 0.002285 | 0.023441 | 0.017684 |
| GO-BP | GO:0034341 | response to interferon-gamma                                        | 178 | 0.317684 | 1.507516 | 0.002287 | 0.023441 | 0.017684 |
| GO-BP | GO:0034599 | cellular response to oxidative stress                               | 277 | 0.289775 | 1.455515 | 0.002289 | 0.023441 | 0.017684 |
| GO-BP | GO:0001541 | ovarian follicle development                                        | 52  | 0.450452 | 1.728723 | 0.002289 | 0.023441 | 0.017684 |
| GO-BP | GO:0030277 | maintenance of gastrointestinal<br>epithelium                       | 21  | 0.599719 | 1.843417 | 0.002289 | 0.023441 | 0.017684 |
| GO-BP | GO:0030878 | thyroid gland development                                           | 21  | 0.59912  | 1.841576 | 0.002289 | 0.023441 | 0.017684 |
| GO-BP | GO:0043300 | regulation of leukocyte degranulation                               | 46  | 0.474775 | 1.775138 | 0.002293 | 0.023454 | 0.017694 |
| GO-BP | GO:0002448 | mast cell mediated immunity                                         | 48  | 0.461357 | 1.738798 | 0.0023   | 0.023498 | 0.017727 |
| GO-BP | GO:0050684 | regulation of mRNA processing                                       | 124 | -0.35476 | -1.60402 | 0.002306 | 0.023531 | 0.017752 |
| GO-BP | GO:0034248 | regulation of cellular amide metabolic<br>process                   | 374 | -0.27333 | -1.42614 | 0.002316 | 0.023603 | 0.017806 |

|       |            |                                                                               |     |          |          |          |          |          |
|-------|------------|-------------------------------------------------------------------------------|-----|----------|----------|----------|----------|----------|
| GO-BP | GO:0010457 | centriole-centriole cohesion                                                  | 14  | -0.6919  | -1.93426 | 0.00232  | 0.023615 | 0.017815 |
| GO-BP | GO:0030488 | tRNA methylation                                                              | 38  | -0.50488 | -1.82178 | 0.002331 | 0.023697 | 0.017877 |
| GO-BP | GO:0043373 | CD4-positive, alpha-beta T cell lineage commitment                            | 17  | -0.63638 | -1.87411 | 0.002334 | 0.023705 | 0.017883 |
| GO-BP | GO:0048304 | positive regulation of isotype switching to IgG isotypes                      | 10  | -0.76076 | -1.91652 | 0.002346 | 0.023803 | 0.017957 |
| GO-BP | GO:0001580 | detection of chemical stimulus involved in sensory perception of bitter taste | 33  | 0.52814  | 1.833992 | 0.002458 | 0.02491  | 0.018792 |
| GO-BP | GO:0010001 | glial cell differentiation                                                    | 209 | 0.301052 | 1.460588 | 0.002465 | 0.024916 | 0.018797 |
| GO-BP | GO:2000311 | regulation of AMPA receptor activity                                          | 24  | 0.568829 | 1.813688 | 0.002465 | 0.024916 | 0.018797 |
| GO-BP | GO:0090208 | positive regulation of triglyceride metabolic process                         | 19  | 0.608969 | 1.824676 | 0.00247  | 0.024916 | 0.018797 |
| GO-BP | GO:0030282 | bone mineralization                                                           | 106 | 0.364468 | 1.60606  | 0.002475 | 0.024916 | 0.018797 |
| GO-BP | GO:1900449 | regulation of glutamate receptor signaling pathway                            | 63  | 0.428415 | 1.712045 | 0.002476 | 0.024916 | 0.018797 |
| GO-BP | GO:1903036 | positive regulation of response to wounding                                   | 63  | 0.426899 | 1.705989 | 0.002476 | 0.024916 | 0.018797 |
| GO-BP | GO:0043405 | regulation of MAP kinase activity                                             | 321 | 0.280928 | 1.43209  | 0.002483 | 0.024944 | 0.018818 |
| GO-BP | GO:0006096 | glycolytic process                                                            | 111 | 0.3581   | 1.589368 | 0.002487 | 0.024944 | 0.018818 |
| GO-BP | GO:0001935 | endothelial cell proliferation                                                | 139 | 0.338703 | 1.553351 | 0.002488 | 0.024944 | 0.018818 |
| GO-BP | GO:0002279 | mast cell activation involved in immune response                              | 48  | 0.458479 | 1.727951 | 0.002492 | 0.024949 | 0.018822 |
| GO-BP | GO:0051145 | smooth muscle cell differentiation                                            | 58  | 0.429976 | 1.688894 | 0.002494 | 0.024949 | 0.018822 |
| GO-BP | GO:0030534 | adult behavior                                                                | 136 | 0.346045 | 1.58026  | 0.0025   | 0.024983 | 0.018847 |
| GO-BP | GO:0031570 | DNA integrity checkpoint                                                      | 151 | -0.33908 | -1.57855 | 0.002513 | 0.02508  | 0.01892  |
| GO-BP | GO:0006284 | base-excision repair                                                          | 41  | -0.48004 | -1.76545 | 0.002528 | 0.02518  | 0.018996 |
| GO-BP | GO:0031294 | lymphocyte costimulation                                                      | 55  | -0.45778 | -1.78949 | 0.002528 | 0.02518  | 0.018996 |
| GO-BP | GO:0002360 | T cell lineage commitment                                                     | 26  | -0.56863 | -1.87633 | 0.002545 | 0.025317 | 0.019099 |
| GO-BP | GO:0051054 | positive regulation of DNA metabolic process                                  | 222 | -0.30124 | -1.47609 | 0.002564 | 0.025477 | 0.01922  |
| GO-BP | GO:0016049 | cell growth                                                                   | 453 | 0.261193 | 1.382026 | 0.002629 | 0.026093 | 0.019685 |
| GO-BP | GO:0071447 | cellular response to hydroperoxide                                            | 8   | 0.782945 | 1.805235 | 0.002642 | 0.026171 | 0.019744 |
| GO-BP | GO:2000300 | regulation of synaptic vesicle exocytosis                                     | 75  | 0.40299  | 1.668769 | 0.002651 | 0.026171 | 0.019744 |
| GO-BP | GO:0010884 | positive regulation of lipid storage                                          | 18  | 0.610219 | 1.803864 | 0.002652 | 0.026171 | 0.019744 |
| GO-BP | GO:0035994 | response to muscle stretch                                                    | 18  | 0.614244 | 1.815763 | 0.002652 | 0.026171 | 0.019744 |
| GO-BP | GO:0051770 | positive regulation of nitric-oxide synthase biosynthetic process             | 15  | 0.649118 | 1.824584 | 0.002652 | 0.026171 | 0.019744 |
| GO-BP | GO:0098698 | postsynaptic specialization assembly                                          | 20  | 0.609721 | 1.851197 | 0.002656 | 0.026176 | 0.019748 |
| GO-BP | GO:0006939 | smooth muscle contraction                                                     | 103 | 0.365259 | 1.599832 | 0.002662 | 0.026177 | 0.019748 |
| GO-BP | GO:0060134 | prepulse inhibition                                                           | 14  | 0.669718 | 1.838771 | 0.002662 | 0.026177 | 0.019748 |
| GO-BP | GO:0017158 | regulation of calcium ion-dependent exocytosis                                | 107 | 0.363137 | 1.601958 | 0.002669 | 0.026217 | 0.019778 |

|       |            |                                                               |     |          |          |          |          |          |
|-------|------------|---------------------------------------------------------------|-----|----------|----------|----------|----------|----------|
| GO-BP | GO:0043534 | blood vessel endothelial cell migration                       | 112 | 0.35492  | 1.577488 | 0.002673 | 0.026233 | 0.01979  |
| GO-BP | GO:0071322 | cellular response to carbohydrate stimulus                    | 137 | 0.340602 | 1.558391 | 0.00269  | 0.026364 | 0.019889 |
| GO-BP | GO:0043484 | regulation of RNA splicing                                    | 120 | -0.35897 | -1.6166  | 0.002722 | 0.02665  | 0.020105 |
| GO-BP | GO:0031122 | cytoplasmic microtubule organization                          | 52  | -0.45461 | -1.75784 | 0.002731 | 0.026709 | 0.02015  |
| GO-BP | GO:0006406 | mRNA export from nucleus                                      | 99  | -0.37896 | -1.65615 | 0.002744 | 0.026779 | 0.020202 |
| GO-BP | GO:0071427 | mRNA-containing ribonucleoprotein complex export from nucleus | 99  | -0.37896 | -1.65615 | 0.002744 | 0.026779 | 0.020202 |
| GO-BP | GO:0035025 | positive regulation of Rho protein signal transduction        | 29  | -0.56106 | -1.90098 | 0.002757 | 0.026868 | 0.020269 |
| GO-BP | GO:0006294 | nucleotide-excision repair, preincision complex assembly      | 28  | -0.56579 | -1.8985  | 0.002764 | 0.026907 | 0.020298 |
| GO-BP | GO:1901976 | regulation of cell cycle checkpoint                           | 30  | -0.56013 | -1.90995 | 0.002769 | 0.026934 | 0.020319 |
| GO-BP | GO:0062012 | regulation of small molecule metabolic process                | 429 | 0.261626 | 1.376959 | 0.002815 | 0.027349 | 0.020632 |
| GO-BP | GO:0050808 | synapse organization                                          | 393 | 0.267678 | 1.396566 | 0.002823 | 0.02739  | 0.020663 |
| GO-BP | GO:0043152 | induction of bacterial agglutination                          | 5   | 0.864466 | 1.71261  | 0.002831 | 0.027423 | 0.020688 |
| GO-BP | GO:0014046 | dopamine secretion                                            | 34  | 0.514776 | 1.799614 | 0.002837 | 0.027423 | 0.020688 |
| GO-BP | GO:0014059 | regulation of dopamine secretion                              | 34  | 0.514776 | 1.799614 | 0.002837 | 0.027423 | 0.020688 |
| GO-BP | GO:0019217 | regulation of fatty acid metabolic process                    | 83  | 0.394286 | 1.661735 | 0.002844 | 0.027423 | 0.020688 |
| GO-BP | GO:1901616 | organic hydroxy compound catabolic process                    | 71  | 0.410725 | 1.683694 | 0.002845 | 0.027423 | 0.020688 |
| GO-BP | GO:0014902 | myotube differentiation                                       | 103 | 0.363004 | 1.589959 | 0.002852 | 0.027423 | 0.020688 |
| GO-BP | GO:0020027 | hemoglobin metabolic process                                  | 14  | 0.667514 | 1.832721 | 0.002852 | 0.027423 | 0.020688 |
| GO-BP | GO:0000041 | transition metal ion transport                                | 107 | 0.358682 | 1.582304 | 0.002859 | 0.027423 | 0.020688 |
| GO-BP | GO:0032368 | regulation of lipid transport                                 | 107 | 0.35822  | 1.580264 | 0.002859 | 0.027423 | 0.020688 |
| GO-BP | GO:0001523 | retinoid metabolic process                                    | 92  | 0.382721 | 1.640382 | 0.00286  | 0.027423 | 0.020688 |
| GO-BP | GO:0090303 | positive regulation of wound healing                          | 53  | 0.438085 | 1.688023 | 0.002861 | 0.027423 | 0.020688 |
| GO-BP | GO:0072330 | monocarboxylic acid biosynthetic process                      | 318 | 0.277856 | 1.414222 | 0.002868 | 0.027423 | 0.020688 |
| GO-BP | GO:0042107 | cytokine metabolic process                                    | 111 | 0.355427 | 1.577502 | 0.00287  | 0.027423 | 0.020688 |
| GO-BP | GO:0001704 | formation of primary germ layer                               | 110 | 0.355785 | 1.576579 | 0.00287  | 0.027423 | 0.020688 |
| GO-BP | GO:0002708 | positive regulation of lymphocyte mediated immunity           | 98  | -0.3795  | -1.65644 | 0.002947 | 0.028123 | 0.021216 |
| GO-BP | GO:0033632 | regulation of cell-cell adhesion mediated by integrin         | 11  | -0.72958 | -1.89475 | 0.002959 | 0.028203 | 0.021277 |
| GO-BP | GO:0140056 | organelle localization by membrane tethering                  | 168 | -0.32556 | -1.54024 | 0.002962 | 0.028203 | 0.021277 |
| GO-BP | GO:0048302 | regulation of isotype switching to IgG isotypes               | 12  | -0.71334 | -1.90487 | 0.002965 | 0.028203 | 0.021277 |
| GO-BP | GO:0003223 | ventricular compact myocardium morphogenesis                  | 8   | -0.77723 | -1.83517 | 0.002977 | 0.028286 | 0.021339 |

|       |            |                                                                        |     |          |          |          |          |          |
|-------|------------|------------------------------------------------------------------------|-----|----------|----------|----------|----------|----------|
| GO-BP | GO:0061842 | microtubule organizing center localization                             | 30  | -0.54705 | -1.86532 | 0.002983 | 0.02831  | 0.021357 |
| GO-BP | GO:0061564 | axon development                                                       | 497 | 0.252627 | 1.349326 | 0.002988 | 0.028335 | 0.021376 |
| GO-BP | GO:0007409 | axonogenesis                                                           | 456 | 0.258002 | 1.365737 | 0.003009 | 0.028486 | 0.02149  |
| GO-BP | GO:0072070 | loop of Henle development                                              | 10  | 0.752236 | 1.867865 | 0.003011 | 0.028486 | 0.02149  |
| GO-BP | GO:0071549 | cellular response to dexamethasone stimulus                            | 30  | 0.522993 | 1.769249 | 0.003014 | 0.028487 | 0.021491 |
| GO-BP | GO:0010092 | specification of animal organ identity                                 | 32  | 0.52769  | 1.816671 | 0.003028 | 0.028581 | 0.021562 |
| GO-BP | GO:0030325 | adrenal gland development                                              | 25  | 0.552651 | 1.777255 | 0.003037 | 0.028581 | 0.021562 |
| GO-BP | GO:0033141 | positive regulation of peptidyl-serine phosphorylation of STAT protein | 19  | 0.600036 | 1.79791  | 0.00304  | 0.028581 | 0.021562 |
| GO-BP | GO:0048639 | positive regulation of developmental growth                            | 163 | 0.327528 | 1.537904 | 0.00304  | 0.028581 | 0.021562 |
| GO-BP | GO:0022898 | regulation of transmembrane transporter activity                       | 251 | 0.291785 | 1.4474   | 0.003041 | 0.028581 | 0.021562 |
| GO-BP | GO:1903672 | positive regulation of sprouting angiogenesis                          | 41  | 0.49069  | 1.787474 | 0.003045 | 0.028585 | 0.021564 |
| GO-BP | GO:1902476 | chloride transmembrane transport                                       | 84  | 0.387435 | 1.634503 | 0.003048 | 0.028585 | 0.021564 |
| GO-BP | GO:0035924 | cellular response to vascular endothelial growth factor stimulus       | 52  | 0.443844 | 1.703362 | 0.003052 | 0.028597 | 0.021574 |
| GO-BP | GO:0010634 | positive regulation of epithelial cell migration                       | 138 | 0.335539 | 1.537737 | 0.00306  | 0.028623 | 0.021593 |
| GO-BP | GO:0072073 | kidney epithelium development                                          | 139 | 0.335242 | 1.537477 | 0.003062 | 0.028623 | 0.021593 |
| GO-BP | GO:1902803 | regulation of synaptic vesicle transport                               | 81  | 0.393538 | 1.649534 | 0.003065 | 0.028625 | 0.021595 |
| GO-BP | GO:0006282 | regulation of DNA repair                                               | 116 | -0.35514 | -1.59223 | 0.00315  | 0.029386 | 0.022169 |
| GO-BP | GO:0000184 | nuclear-transcribed mRNA catabolic process, nonsense-mediated decay    | 100 | -0.37281 | -1.63383 | 0.003155 | 0.029391 | 0.022173 |
| GO-BP | GO:0048291 | isotype switching to IgG isotypes                                      | 13  | -0.70075 | -1.92156 | 0.003157 | 0.029391 | 0.022173 |
| GO-BP | GO:0051168 | nuclear export                                                         | 181 | -0.31611 | -1.50938 | 0.003167 | 0.029446 | 0.022214 |
| GO-BP | GO:0016458 | gene silencing                                                         | 266 | -0.28665 | -1.44087 | 0.00317  | 0.029446 | 0.022214 |
| GO-BP | GO:0000154 | rRNA modification                                                      | 32  | -0.52317 | -1.81466 | 0.003179 | 0.029458 | 0.022223 |
| GO-BP | GO:0051642 | centrosome localization                                                | 29  | -0.55765 | -1.88941 | 0.003181 | 0.029458 | 0.022223 |
| GO-BP | GO:0034453 | microtubule anchoring                                                  | 26  | -0.55926 | -1.84541 | 0.003181 | 0.029458 | 0.022223 |
| GO-BP | GO:0006473 | protein acetylation                                                    | 193 | -0.31393 | -1.51156 | 0.003185 | 0.029458 | 0.022223 |
| GO-BP | GO:0051918 | negative regulation of fibrinolysis                                    | 10  | 0.749661 | 1.861471 | 0.003199 | 0.029559 | 0.0223   |
| GO-BP | GO:0019433 | triglyceride catabolic process                                         | 33  | 0.51367  | 1.783744 | 0.003215 | 0.029669 | 0.022382 |
| GO-BP | GO:1903034 | regulation of response to wounding                                     | 165 | 0.324246 | 1.525115 | 0.003223 | 0.029669 | 0.022382 |
| GO-BP | GO:0002374 | cytokine secretion involved in immune response                         | 20  | 0.603014 | 1.830833 | 0.003225 | 0.029669 | 0.022382 |
| GO-BP | GO:0099601 | regulation of neurotransmitter receptor activity                       | 71  | 0.405471 | 1.662157 | 0.003225 | 0.029669 | 0.022382 |
| GO-BP | GO:0031670 | cellular response to nutrient                                          | 68  | 0.410213 | 1.666182 | 0.003231 | 0.029687 | 0.022396 |
| GO-BP | GO:0035809 | regulation of urine volume                                             | 21  | 0.588099 | 1.807701 | 0.003243 | 0.029687 | 0.022396 |

|       |            |                                                                               |     |          |          |          |          |          |
|-------|------------|-------------------------------------------------------------------------------|-----|----------|----------|----------|----------|----------|
| GO-BP | GO:0002532 | production of molecular mediator involved in inflammatory response            | 64  | 0.41457  | 1.662686 | 0.003244 | 0.029687 | 0.022396 |
| GO-BP | GO:0009948 | anterior/posterior axis specification                                         | 47  | 0.465236 | 1.747976 | 0.003244 | 0.029687 | 0.022396 |
| GO-BP | GO:0043303 | mast cell degranulation                                                       | 47  | 0.465212 | 1.747883 | 0.003244 | 0.029687 | 0.022396 |
| GO-BP | GO:0061025 | membrane fusion                                                               | 146 | 0.331646 | 1.53245  | 0.003254 | 0.029713 | 0.022416 |
| GO-BP | GO:0003158 | endothelium development                                                       | 121 | 0.342891 | 1.539617 | 0.003257 | 0.029713 | 0.022416 |
| GO-BP | GO:0030301 | cholesterol transport                                                         | 82  | 0.38913  | 1.633796 | 0.003257 | 0.029713 | 0.022416 |
| GO-BP | GO:0046631 | alpha-beta T cell activation                                                  | 129 | -0.34017 | -1.54748 | 0.003351 | 0.030546 | 0.023044 |
| GO-BP | GO:0000245 | spliceosomal complex assembly                                                 | 55  | -0.44377 | -1.73476 | 0.003371 | 0.030694 | 0.023156 |
| GO-BP | GO:0043981 | histone H4-K5 acetylation                                                     | 16  | -0.6404  | -1.85368 | 0.003385 | 0.030753 | 0.0232   |
| GO-BP | GO:0043982 | histone H4-K8 acetylation                                                     | 16  | -0.6404  | -1.85368 | 0.003385 | 0.030753 | 0.0232   |
| GO-BP | GO:0002740 | negative regulation of cytokine secretion involved in immune response         | 6   | 0.822969 | 1.735047 | 0.003391 | 0.030774 | 0.023216 |
| GO-BP | GO:0006298 | mismatch repair                                                               | 33  | -0.52554 | -1.83159 | 0.003394 | 0.030774 | 0.023216 |
| GO-BP | GO:0031935 | regulation of chromatin silencing                                             | 37  | -0.50106 | -1.79645 | 0.003404 | 0.030827 | 0.023256 |
| GO-BP | GO:0042035 | regulation of cytokine biosynthetic process                                   | 101 | 0.363444 | 1.585157 | 0.003417 | 0.030871 | 0.023289 |
| GO-BP | GO:0042866 | pyruvate biosynthetic process                                                 | 115 | 0.348886 | 1.558122 | 0.003427 | 0.030871 | 0.023289 |
| GO-BP | GO:0045778 | positive regulation of ossification                                           | 84  | 0.384692 | 1.622932 | 0.003429 | 0.030871 | 0.023289 |
| GO-BP | GO:0042475 | odontogenesis of dentin-containing tooth                                      | 89  | 0.376226 | 1.6047   | 0.00343  | 0.030871 | 0.023289 |
| GO-BP | GO:0051196 | regulation of coenzyme metabolic process                                      | 92  | 0.372839 | 1.598026 | 0.003432 | 0.030871 | 0.023289 |
| GO-BP | GO:0061614 | pri-miRNA transcription by RNA polymerase II                                  | 47  | 0.463462 | 1.741308 | 0.003434 | 0.030871 | 0.023289 |
| GO-BP | GO:0006757 | ATP generation from ADP                                                       | 112 | 0.350485 | 1.557773 | 0.003437 | 0.030871 | 0.023289 |
| GO-BP | GO:0030900 | forebrain development                                                         | 372 | 0.269047 | 1.393821 | 0.003438 | 0.030871 | 0.023289 |
| GO-BP | GO:0001936 | regulation of endothelial cell proliferation                                  | 124 | 0.345699 | 1.558672 | 0.00344  | 0.030871 | 0.023289 |
| GO-BP | GO:0030521 | androgen receptor signaling pathway                                           | 61  | -0.42467 | -1.69883 | 0.003556 | 0.031874 | 0.024045 |
| GO-BP | GO:0046460 | neutral lipid biosynthetic process                                            | 37  | 0.497463 | 1.77392  | 0.003584 | 0.031986 | 0.024131 |
| GO-BP | GO:0046463 | acylglycerol biosynthetic process                                             | 37  | 0.497463 | 1.77392  | 0.003584 | 0.031986 | 0.024131 |
| GO-BP | GO:0061309 | cardiac neural crest cell development involved in outflow tract morphogenesis | 9   | 0.746848 | 1.787965 | 0.003586 | 0.031986 | 0.024131 |
| GO-BP | GO:0071241 | cellular response to inorganic substance                                      | 204 | 0.299926 | 1.452443 | 0.003592 | 0.031986 | 0.024131 |
| GO-BP | GO:0051383 | kinetochore organization                                                      | 20  | -0.60981 | -1.88438 | 0.003594 | 0.031986 | 0.024131 |
| GO-BP | GO:1901988 | negative regulation of cell cycle phase transition                            | 234 | -0.29307 | -1.44822 | 0.0036   | 0.031986 | 0.024131 |
| GO-BP | GO:0003151 | outflow tract morphogenesis                                                   | 77  | 0.397941 | 1.654978 | 0.003603 | 0.031986 | 0.024131 |
| GO-BP | GO:0060561 | apoptotic process involved in morphogenesis                                   | 25  | 0.54866  | 1.764421 | 0.003606 | 0.031986 | 0.024131 |

|       |            |                                                                    |     |          |          |          |          |          |
|-------|------------|--------------------------------------------------------------------|-----|----------|----------|----------|----------|----------|
| GO-BP | GO:0019233 | sensory perception of pain                                         | 101 | 0.361439 | 1.576412 | 0.003607 | 0.031986 | 0.024131 |
| GO-BP | GO:0006885 | regulation of pH                                                   | 93  | 0.374987 | 1.611588 | 0.003617 | 0.031986 | 0.024131 |
| GO-BP | GO:0070555 | response to interleukin-1                                          | 187 | 0.310509 | 1.483942 | 0.003617 | 0.031986 | 0.024131 |
| GO-BP | GO:0007631 | feeding behavior                                                   | 95  | 0.37364  | 1.613335 | 0.00362  | 0.031986 | 0.024131 |
| GO-BP | GO:0001759 | organ induction                                                    | 21  | 0.585879 | 1.800878 | 0.003625 | 0.031986 | 0.024131 |
| GO-BP | GO:0021545 | cranial nerve development                                          | 47  | 0.459965 | 1.728168 | 0.003625 | 0.031986 | 0.024131 |
| GO-BP | GO:1903708 | positive regulation of hemopoiesis                                 | 177 | 0.312411 | 1.481226 | 0.003627 | 0.031986 | 0.024131 |
| GO-BP | GO:0044262 | cellular carbohydrate metabolic process                            | 273 | 0.284852 | 1.42783  | 0.00363  | 0.031986 | 0.024131 |
| GO-BP | GO:0120163 | negative regulation of cold-induced thermogenesis                  | 46  | 0.462477 | 1.729156 | 0.003631 | 0.031986 | 0.024131 |
| GO-BP | GO:0042476 | odontogenesis                                                      | 130 | 0.336206 | 1.526758 | 0.003644 | 0.03207  | 0.024194 |
| GO-BP | GO:0001820 | serotonin secretion                                                | 10  | 0.729094 | 1.810401 | 0.003764 | 0.033083 | 0.024958 |
| GO-BP | GO:0030183 | B cell differentiation                                             | 127 | -0.34072 | -1.54613 | 0.003778 | 0.033083 | 0.024958 |
| GO-BP | GO:0048741 | skeletal muscle fiber development                                  | 32  | 0.514753 | 1.772131 | 0.003785 | 0.033083 | 0.024958 |
| GO-BP | GO:0060192 | negative regulation of lipase activity                             | 15  | 0.643114 | 1.807709 | 0.003789 | 0.033083 | 0.024958 |
| GO-BP | GO:0060080 | inhibitory postsynaptic potential                                  | 16  | 0.625564 | 1.787622 | 0.003791 | 0.033083 | 0.024958 |
| GO-BP | GO:0097091 | synaptic vesicle clustering                                        | 16  | 0.625249 | 1.786722 | 0.003791 | 0.033083 | 0.024958 |
| GO-BP | GO:2000027 | regulation of animal organ morphogenesis                           | 246 | 0.292184 | 1.445612 | 0.003792 | 0.033083 | 0.024958 |
| GO-BP | GO:0031100 | animal organ regeneration                                          | 71  | 0.402798 | 1.651197 | 0.003794 | 0.033083 | 0.024958 |
| GO-BP | GO:0043500 | muscle adaptation                                                  | 99  | 0.363527 | 1.581389 | 0.003799 | 0.033083 | 0.024958 |
| GO-BP | GO:0032890 | regulation of organic acid transport                               | 56  | 0.425423 | 1.661101 | 0.003802 | 0.033083 | 0.024958 |
| GO-BP | GO:0043369 | CD4-positive or CD8-positive, alpha-beta T cell lineage commitment | 20  | -0.59711 | -1.84513 | 0.003805 | 0.033083 | 0.024958 |
| GO-BP | GO:1904666 | regulation of ubiquitin protein ligase activity                    | 20  | -0.60099 | -1.85713 | 0.003805 | 0.033083 | 0.024958 |
| GO-BP | GO:0016075 | rRNA catabolic process                                             | 18  | -0.6178  | -1.84916 | 0.003812 | 0.033083 | 0.024958 |
| GO-BP | GO:0051004 | regulation of lipoprotein lipase activity                          | 21  | 0.58334  | 1.793073 | 0.003815 | 0.033083 | 0.024958 |
| GO-BP | GO:0030641 | regulation of cellular pH                                          | 85  | 0.378441 | 1.599783 | 0.003816 | 0.033083 | 0.024958 |
| GO-BP | GO:0072144 | glomerular mesangial cell development                              | 5   | 0.85378  | 1.691441 | 0.003963 | 0.034308 | 0.025882 |
| GO-BP | GO:0007568 | aging                                                              | 303 | 0.277758 | 1.408902 | 0.003967 | 0.034308 | 0.025882 |
| GO-BP | GO:0140053 | mitochondrial gene expression                                      | 159 | -0.32324 | -1.51946 | 0.003975 | 0.034308 | 0.025882 |
| GO-BP | GO:0032352 | positive regulation of hormone metabolic process                   | 15  | 0.642353 | 1.80557  | 0.003978 | 0.034308 | 0.025882 |
| GO-BP | GO:0045932 | negative regulation of muscle contraction                          | 22  | 0.57102  | 1.780563 | 0.003979 | 0.034308 | 0.025882 |
| GO-BP | GO:0042693 | muscle cell fate commitment                                        | 16  | 0.623947 | 1.783001 | 0.003981 | 0.034308 | 0.025882 |
| GO-BP | GO:1901214 | regulation of neuron death                                         | 294 | 0.278653 | 1.407064 | 0.003997 | 0.034381 | 0.025937 |
| GO-BP | GO:1902275 | regulation of chromatin organization                               | 179 | -0.31592 | -1.50871 | 0.003997 | 0.034381 | 0.025937 |
| GO-BP | GO:0002834 | regulation of response to tumor cell                               | 14  | -0.66846 | -1.86874 | 0.004007 | 0.034393 | 0.025946 |
| GO-BP | GO:0002837 | regulation of immune response to                                   | 14  | -0.66846 | -1.86874 | 0.004007 | 0.034393 | 0.025946 |

|       |            |                                                        |     |          |          |          |          |          |  |
|-------|------------|--------------------------------------------------------|-----|----------|----------|----------|----------|----------|--|
|       |            | tumor cell                                             |     |          |          |          |          |          |  |
| GO-BP | GO:0042542 | response to hydrogen peroxide                          | 132 | 0.330574 | 1.505185 | 0.004012 | 0.034406 | 0.025956 |  |
| GO-BP | GO:0061337 | cardiac conduction                                     | 138 | 0.326773 | 1.497565 | 0.004017 | 0.034412 | 0.02596  |  |
| GO-BP | GO:0006346 | methylation-dependent chromatin silencing              | 22  | -0.58406 | -1.8487  | 0.004022 | 0.034422 | 0.025968 |  |
| GO-BP | GO:0061041 | regulation of wound healing                            | 137 | 0.330285 | 1.511188 | 0.004035 | 0.034475 | 0.026008 |  |
| GO-BP | GO:0031589 | cell-substrate adhesion                                | 337 | 0.270587 | 1.384532 | 0.004037 | 0.034475 | 0.026008 |  |
| GO-BP | GO:0001666 | response to hypoxia                                    | 343 | 0.271293 | 1.390286 | 0.00404  | 0.034475 | 0.026008 |  |
| GO-BP | GO:0051581 | negative regulation of neurotransmitter uptake         | 6   | 0.816854 | 1.722154 | 0.004145 | 0.035333 | 0.026656 |  |
| GO-BP | GO:0034367 | protein-containing complex remodeling                  | 29  | 0.529054 | 1.771047 | 0.004162 | 0.035446 | 0.02674  |  |
| GO-BP | GO:0021511 | spinal cord patterning                                 | 23  | 0.562062 | 1.772553 | 0.004176 | 0.03549  | 0.026773 |  |
| GO-BP | GO:0060004 | reflex                                                 | 19  | 0.591253 | 1.771594 | 0.004179 | 0.03549  | 0.026773 |  |
| GO-BP | GO:1904469 | positive regulation of tumor necrosis factor secretion | 19  | 0.590548 | 1.769479 | 0.004179 | 0.03549  | 0.026773 |  |
| GO-BP | GO:0030225 | macrophage differentiation                             | 43  | 0.475775 | 1.753025 | 0.00419  | 0.03555  | 0.026819 |  |
| GO-BP | GO:1903580 | positive regulation of ATP metabolic process           | 45  | 0.46113  | 1.715164 | 0.0042   | 0.035568 | 0.026832 |  |
| GO-BP | GO:0007004 | telomere maintenance via telomerase                    | 66  | -0.40875 | -1.65878 | 0.004201 | 0.035568 | 0.026832 |  |
| GO-BP | GO:0042089 | cytokine biosynthetic process                          | 110 | 0.350856 | 1.55474  | 0.00421  | 0.03558  | 0.026841 |  |
| GO-BP | GO:0007100 | mitotic centrosome separation                          | 14  | -0.66481 | -1.85852 | 0.004218 | 0.03558  | 0.026841 |  |
| GO-BP | GO:0036092 | phosphatidylinositol-3-phosphate biosynthetic process  | 14  | -0.66457 | -1.85784 | 0.004218 | 0.03558  | 0.026841 |  |
| GO-BP | GO:0051225 | spindle assembly                                       | 99  | -0.36763 | -1.60666 | 0.004222 | 0.03558  | 0.026841 |  |
| GO-BP | GO:0030856 | regulation of epithelial cell differentiation          | 140 | 0.327469 | 1.502665 | 0.004223 | 0.03558  | 0.026841 |  |
| GO-BP | GO:0032201 | telomere maintenance via semi-conservative replication | 27  | -0.54948 | -1.83137 | 0.004233 | 0.035631 | 0.02688  |  |
| GO-BP | GO:0070317 | negative regulation of G0 to G1 transition             | 37  | -0.49723 | -1.78272 | 0.004254 | 0.035778 | 0.026991 |  |
| GO-BP | GO:0009313 | oligosaccharide catabolic process                      | 13  | 0.666602 | 1.788178 | 0.00438  | 0.0368   | 0.027762 |  |
| GO-BP | GO:0022406 | membrane docking                                       | 177 | -0.31582 | -1.50716 | 0.004409 | 0.037007 | 0.027918 |  |
| GO-BP | GO:0046128 | purine ribonucleoside metabolic process                | 70  | -0.40431 | -1.65761 | 0.004435 | 0.03719  | 0.028056 |  |
| GO-BP | GO:0043984 | histone H4-K16 acetylation                             | 20  | -0.5929  | -1.83212 | 0.00444  | 0.037193 | 0.028058 |  |
| GO-BP | GO:0046600 | negative regulation of centriole replication           | 8   | -0.77287 | -1.82489 | 0.004465 | 0.037371 | 0.028192 |  |
| GO-BP | GO:0007000 | nucleolus organization                                 | 7   | -0.78573 | -1.78475 | 0.004477 | 0.03743  | 0.028237 |  |
| GO-BP | GO:0050769 | positive regulation of neurogenesis                    | 450 | 0.253235 | 1.33837  | 0.004527 | 0.037797 | 0.028514 |  |
| GO-BP | GO:0015858 | nucleoside transport                                   | 8   | 0.765593 | 1.765228 | 0.004529 | 0.037797 | 0.028514 |  |
| GO-BP | GO:0045923 | positive regulation of fatty acid metabolic process    | 34  | 0.499313 | 1.745556 | 0.004539 | 0.03781  | 0.028524 |  |
| GO-BP | GO:2000191 | regulation of fatty acid transport                     | 26  | 0.539712 | 1.754363 | 0.004539 | 0.03781  | 0.028524 |  |



|       |            |                                                                    |     |          |          |          |          |          |
|-------|------------|--------------------------------------------------------------------|-----|----------|----------|----------|----------|----------|
| GO-BP | GO:0001990 | regulation of systemic arterial blood pressure by hormone          | 40  | 0.474708 | 1.723513 | 0.004546 | 0.037831 | 0.02854  |
| GO-BP | GO:0046697 | decidualization                                                    | 23  | 0.557372 | 1.75776  | 0.004556 | 0.037874 | 0.028572 |
| GO-BP | GO:1902893 | regulation of pri-miRNA transcription by RNA polymerase II         | 41  | 0.475238 | 1.731186 | 0.004567 | 0.037931 | 0.028615 |
| GO-BP | GO:0051784 | negative regulation of nuclear division                            | 60  | -0.41925 | -1.6712  | 0.004606 | 0.038221 | 0.028834 |
| GO-BP | GO:1902107 | positive regulation of leukocyte differentiation                   | 141 | 0.325593 | 1.494901 | 0.004617 | 0.038274 | 0.028874 |
| GO-BP | GO:0006278 | RNA-dependent DNA biosynthetic process                             | 68  | -0.40878 | -1.66714 | 0.004641 | 0.038438 | 0.028998 |
| GO-BP | GO:0072393 | microtubule anchoring at microtubule organizing center             | 12  | -0.68281 | -1.82336 | 0.004659 | 0.038548 | 0.029081 |
| GO-BP | GO:1902100 | negative regulation of metaphase/anaphase transition of cell cycle | 37  | -0.49211 | -1.76437 | 0.00468  | 0.03868  | 0.029181 |
| GO-BP | GO:0001840 | neural plate development                                           | 10  | -0.73106 | -1.84169 | 0.004693 | 0.03868  | 0.029181 |
| GO-BP | GO:0090309 | positive regulation of methylation-dependent chromatin silencing   | 10  | -0.7287  | -1.83575 | 0.004693 | 0.03868  | 0.029181 |
| GO-BP | GO:1904779 | regulation of protein localization to centrosome                   | 10  | -0.73179 | -1.84353 | 0.004693 | 0.03868  | 0.029181 |
| GO-BP | GO:0032412 | regulation of ion transmembrane transporter activity               | 243 | 0.289518 | 1.432458 | 0.004707 | 0.038718 | 0.029209 |
| GO-BP | GO:1901642 | nucleoside transmembrane transport                                 | 7   | 0.79408  | 1.759576 | 0.004707 | 0.038718 | 0.029209 |
| GO-BP | GO:0048588 | developmental cell growth                                          | 214 | 0.292183 | 1.424208 | 0.004711 | 0.038718 | 0.029209 |
| GO-BP | GO:0007190 | activation of adenylate cyclase activity                           | 36  | 0.48855  | 1.72849  | 0.004732 | 0.038813 | 0.029281 |
| GO-BP | GO:0007618 | mating                                                             | 40  | 0.472286 | 1.714721 | 0.004736 | 0.038813 | 0.029281 |
| GO-BP | GO:0033344 | cholesterol efflux                                                 | 40  | 0.472381 | 1.715065 | 0.004736 | 0.038813 | 0.029281 |
| GO-BP | GO:0090287 | regulation of cellular response to growth factor stimulus          | 261 | 0.283052 | 1.411476 | 0.004744 | 0.038843 | 0.029303 |
| GO-BP | GO:0051453 | regulation of intracellular pH                                     | 79  | 0.389563 | 1.628379 | 0.004756 | 0.038903 | 0.029348 |
| GO-BP | GO:0061351 | neural precursor cell proliferation                                | 144 | 0.324198 | 1.495614 | 0.004775 | 0.039022 | 0.029438 |
| GO-BP | GO:0030203 | glycosaminoglycan metabolic process                                | 159 | 0.319332 | 1.49277  | 0.004787 | 0.039084 | 0.029485 |
| GO-BP | GO:0036293 | response to decreased oxygen levels                                | 353 | 0.267956 | 1.378749 | 0.004796 | 0.039084 | 0.029485 |
| GO-BP | GO:0051926 | negative regulation of calcium ion transport                       | 58  | 0.414829 | 1.629398 | 0.004796 | 0.039084 | 0.029485 |
| GO-BP | GO:0006661 | phosphatidylinositol biosynthetic process                          | 109 | -0.35634 | -1.58179 | 0.004817 | 0.039219 | 0.029587 |
| GO-BP | GO:0010886 | positive regulation of cholesterol storage                         | 7   | 0.790222 | 1.751027 | 0.004895 | 0.039735 | 0.029976 |
| GO-BP | GO:0061087 | positive regulation of histone H3-K27 methylation                  | 6   | -0.82124 | -1.7833  | 0.0049   | 0.039735 | 0.029976 |

|       |            |                                                                    |     |          |          |          |          |          |
|-------|------------|--------------------------------------------------------------------|-----|----------|----------|----------|----------|----------|
| GO-BP | GO:0045008 | depyrimidination                                                   | 7   | -0.78415 | -1.78116 | 0.004903 | 0.039735 | 0.029976 |
| GO-BP | GO:0043415 | positive regulation of skeletal muscle tissue regeneration         | 5   | 0.844548 | 1.673152 | 0.004907 | 0.039735 | 0.029976 |
| GO-BP | GO:0034371 | chylomicron remodeling                                             | 9   | 0.738322 | 1.767553 | 0.004908 | 0.039735 | 0.029976 |
| GO-BP | GO:0045761 | regulation of adenylate cyclase activity                           | 28  | 0.525966 | 1.744634 | 0.004908 | 0.039735 | 0.029976 |
| GO-BP | GO:1905874 | regulation of postsynaptic density organization                    | 15  | 0.636229 | 1.788356 | 0.004925 | 0.039841 | 0.030056 |
| GO-BP | GO:0042226 | interleukin-6 biosynthetic process                                 | 23  | 0.553287 | 1.744878 | 0.004935 | 0.03985  | 0.030063 |
| GO-BP | GO:0089718 | amino acid import across plasma membrane                           | 23  | 0.553315 | 1.744967 | 0.004935 | 0.03985  | 0.030063 |
| GO-BP | GO:0042551 | neuron maturation                                                  | 47  | 0.452275 | 1.699276 | 0.004961 | 0.040018 | 0.03019  |
| GO-BP | GO:0018394 | peptidyl-lysine acetylation                                        | 161 | -0.3192  | -1.50335 | 0.005026 | 0.040507 | 0.030559 |
| GO-BP | GO:0046599 | regulation of centriole replication                                | 21  | -0.58372 | -1.82721 | 0.005042 | 0.040597 | 0.030627 |
| GO-BP | GO:0043970 | histone H3-K9 acetylation                                          | 13  | -0.67016 | -1.83768 | 0.005052 | 0.040637 | 0.030656 |
| GO-BP | GO:0006541 | glutamine metabolic process                                        | 23  | -0.56665 | -1.81547 | 0.00507  | 0.040745 | 0.030738 |
| GO-BP | GO:0007020 | microtubule nucleation                                             | 24  | -0.56213 | -1.81949 | 0.005076 | 0.040759 | 0.030749 |
| GO-BP | GO:0070198 | protein localization to chromosome, telomeric region               | 26  | -0.53979 | -1.78116 | 0.00509  | 0.040834 | 0.030805 |
| GO-BP | GO:0090383 | phagosome acidification                                            | 28  | 0.525409 | 1.742786 | 0.005096 | 0.040845 | 0.030814 |
| GO-BP | GO:0006449 | regulation of translational termination                            | 8   | -0.7634  | -1.80252 | 0.005103 | 0.040863 | 0.030827 |
| GO-BP | GO:0019722 | calcium-mediated signaling                                         | 207 | 0.290693 | 1.408736 | 0.005118 | 0.040866 | 0.03083  |
| GO-BP | GO:0007416 | synapse assembly                                                   | 166 | 0.31375  | 1.476024 | 0.005119 | 0.040866 | 0.03083  |
| GO-BP | GO:0045913 | positive regulation of carbohydrate metabolic process              | 77  | 0.390643 | 1.624626 | 0.005119 | 0.040866 | 0.03083  |
| GO-BP | GO:0031282 | regulation of guanylate cyclase activity                           | 11  | 0.702749 | 1.798529 | 0.005122 | 0.040866 | 0.03083  |
| GO-BP | GO:0043279 | response to alkaloid                                               | 103 | 0.350379 | 1.534658 | 0.005133 | 0.040914 | 0.030866 |
| GO-BP | GO:0007219 | Notch signaling pathway                                            | 185 | 0.304592 | 1.452993 | 0.005154 | 0.041041 | 0.030961 |
| GO-BP | GO:0048193 | Golgi vesicle transport                                            | 346 | -0.2617  | -1.35543 | 0.005231 | 0.04162  | 0.031398 |
| GO-BP | GO:1905065 | positive regulation of vascular smooth muscle cell differentiation | 6   | 0.806249 | 1.699796 | 0.005275 | 0.041917 | 0.031623 |
| GO-BP | GO:0045814 | negative regulation of gene expression, epigenetic                 | 114 | -0.35081 | -1.56574 | 0.00528  | 0.041917 | 0.031623 |
| GO-BP | GO:0071548 | response to dexamethasone                                          | 39  | 0.47209  | 1.704229 | 0.005283 | 0.041917 | 0.031623 |
| GO-BP | GO:0072540 | T-helper 17 cell lineage commitment                                | 12  | -0.67735 | -1.80878 | 0.005294 | 0.041925 | 0.031628 |
| GO-BP | GO:0097164 | ammonium ion metabolic process                                     | 194 | 0.300517 | 1.443379 | 0.005298 | 0.041925 | 0.031628 |
| GO-BP | GO:0038066 | p38MAPK cascade                                                    | 40  | 0.468073 | 1.699425 | 0.005304 | 0.041925 | 0.031628 |
| GO-BP | GO:0002675 | positive regulation of acute inflammatory response                 | 27  | 0.529499 | 1.73967  | 0.005306 | 0.041925 | 0.031628 |
| GO-BP | GO:0090196 | regulation of chemokine secretion                                  | 16  | 0.616453 | 1.761586 | 0.005308 | 0.041925 | 0.031628 |
| GO-BP | GO:0019226 | transmission of nerve impulse                                      | 70  | 0.399478 | 1.631075 | 0.005316 | 0.041951 | 0.031648 |
| GO-BP | GO:0051339 | regulation of lyase activity                                       | 43  | 0.462476 | 1.704023 | 0.005333 | 0.042017 | 0.031697 |
| GO-BP | GO:0042698 | ovulation cycle                                                    | 66  | 0.400426 | 1.615211 | 0.005342 | 0.042017 | 0.031697 |

|       |            |                                                                 |     |          |          |          |          |          |
|-------|------------|-----------------------------------------------------------------|-----|----------|----------|----------|----------|----------|
| GO-BP | GO:0030857 | negative regulation of epithelial cell differentiation          | 42  | 0.465686 | 1.707156 | 0.005344 | 0.042017 | 0.031697 |
| GO-BP | GO:0071496 | cellular response to external stimulus                          | 321 | 0.272538 | 1.38932  | 0.005348 | 0.042017 | 0.031697 |
| GO-BP | GO:0003205 | cardiac chamber development                                     | 169 | 0.313814 | 1.478496 | 0.005349 | 0.042017 | 0.031697 |
| GO-BP | GO:0001101 | response to acid chemical                                       | 330 | 0.267646 | 1.367397 | 0.005358 | 0.042029 | 0.031707 |
| GO-BP | GO:0071902 | positive regulation of protein serine/threonine kinase activity | 317 | 0.271345 | 1.380466 | 0.00536  | 0.042029 | 0.031707 |
| GO-BP | GO:1903578 | regulation of ATP metabolic process                             | 117 | 0.337566 | 1.508743 | 0.005365 | 0.042032 | 0.031709 |
| GO-BP | GO:0043524 | negative regulation of neuron apoptotic process                 | 140 | 0.322437 | 1.479573 | 0.005374 | 0.042066 | 0.031735 |
| GO-BP | GO:0000077 | DNA damage checkpoint                                           | 139 | -0.32909 | -1.51332 | 0.005444 | 0.042573 | 0.032117 |
| GO-BP | GO:0032609 | interferon-gamma production                                     | 104 | -0.35725 | -1.57486 | 0.00547  | 0.042673 | 0.032192 |
| GO-BP | GO:0032350 | regulation of hormone metabolic process                         | 37  | 0.485647 | 1.731786 | 0.005471 | 0.042673 | 0.032192 |
| GO-BP | GO:0050863 | regulation of T cell activation                                 | 300 | -0.27139 | -1.38443 | 0.005471 | 0.042673 | 0.032192 |
| GO-BP | GO:0070897 | transcription preinitiation complex assembly                    | 41  | -0.46151 | -1.69728 | 0.005477 | 0.04268  | 0.032198 |
| GO-BP | GO:0010669 | epithelial structure maintenance                                | 29  | 0.519386 | 1.738681 | 0.005486 | 0.042703 | 0.032216 |
| GO-BP | GO:0090197 | positive regulation of chemokine secretion                      | 15  | 0.632458 | 1.777756 | 0.005493 | 0.042703 | 0.032216 |
| GO-BP | GO:0046886 | positive regulation of hormone biosynthetic process             | 11  | 0.69875  | 1.788293 | 0.005502 | 0.042703 | 0.032216 |
| GO-BP | GO:0002714 | positive regulation of B cell mediated immunity                 | 36  | -0.48708 | -1.73757 | 0.00551  | 0.042703 | 0.032216 |
| GO-BP | GO:0002891 | positive regulation of immunoglobulin mediated immune response  | 36  | -0.48708 | -1.73757 | 0.00551  | 0.042703 | 0.032216 |
| GO-BP | GO:0046839 | phospholipid dephosphorylation                                  | 36  | -0.4881  | -1.74121 | 0.00551  | 0.042703 | 0.032216 |
| GO-BP | GO:0001938 | positive regulation of endothelial cell proliferation           | 92  | 0.3644   | 1.561857 | 0.005529 | 0.042816 | 0.0323   |
| GO-BP | GO:0030308 | negative regulation of cell growth                              | 177 | 0.307561 | 1.458229 | 0.005535 | 0.042819 | 0.032303 |
| GO-BP | GO:0070169 | positive regulation of biomineral tissue development            | 46  | 0.454375 | 1.698864 | 0.005542 | 0.042819 | 0.032303 |
| GO-BP | GO:0050728 | negative regulation of inflammatory response                    | 129 | 0.331162 | 1.501439 | 0.005547 | 0.042819 | 0.032303 |
| GO-BP | GO:0007585 | respiratory gaseous exchange                                    | 60  | 0.410183 | 1.623281 | 0.005549 | 0.042819 | 0.032303 |
| GO-BP | GO:0051402 | neuron apoptotic process                                        | 226 | 0.287602 | 1.411572 | 0.005629 | 0.043341 | 0.032697 |
| GO-BP | GO:0022604 | regulation of cell morphogenesis                                | 470 | 0.248993 | 1.321564 | 0.005635 | 0.043341 | 0.032697 |
| GO-BP | GO:0045906 | negative regulation of vasoconstriction                         | 7   | 0.786112 | 1.741921 | 0.005649 | 0.043341 | 0.032697 |
| GO-BP | GO:0098910 | regulation of atrial cardiac muscle cell action potential       | 6   | 0.801547 | 1.689885 | 0.005652 | 0.043341 | 0.032697 |
| GO-BP | GO:0016445 | somatic diversification of immunoglobulins                      | 60  | -0.41197 | -1.64218 | 0.005653 | 0.043341 | 0.032697 |

|       |            |                                                                         |     |          |          |          |          |          |
|-------|------------|-------------------------------------------------------------------------|-----|----------|----------|----------|----------|----------|
| GO-BP | GO:0019080 | viral gene expression                                                   | 170 | -0.31062 | -1.47348 | 0.00566  | 0.043341 | 0.032697 |
| GO-BP | GO:0045940 | positive regulation of steroid metabolic process                        | 26  | 0.532957 | 1.732408 | 0.005674 | 0.043341 | 0.032697 |
| GO-BP | GO:0061082 | myeloid leukocyte cytokine production                                   | 29  | 0.518684 | 1.736332 | 0.005675 | 0.043341 | 0.032697 |
| GO-BP | GO:1901215 | negative regulation of neuron death                                     | 194 | 0.300047 | 1.441121 | 0.005676 | 0.043341 | 0.032697 |
| GO-BP | GO:0002920 | regulation of humoral immune response                                   | 72  | 0.393336 | 1.617153 | 0.005679 | 0.043341 | 0.032697 |
| GO-BP | GO:1901032 | negative regulation of response to reactive oxygen species              | 15  | 0.629387 | 1.769124 | 0.005683 | 0.043341 | 0.032697 |
| GO-BP | GO:1903206 | negative regulation of hydrogen peroxide-induced cell death             | 15  | 0.629387 | 1.769124 | 0.005683 | 0.043341 | 0.032697 |
| GO-BP | GO:2001039 | negative regulation of cellular response to drug                        | 15  | 0.629387 | 1.769124 | 0.005683 | 0.043341 | 0.032697 |
| GO-BP | GO:0061307 | cardiac neural crest cell differentiation involved in heart development | 11  | 0.691433 | 1.769569 | 0.005692 | 0.043341 | 0.032697 |
| GO-BP | GO:0061308 | cardiac neural crest cell development involved in heart development     | 11  | 0.691433 | 1.769569 | 0.005692 | 0.043341 | 0.032697 |
| GO-BP | GO:0007213 | G protein-coupled acetylcholine receptor signaling pathway              | 19  | 0.58457  | 1.751569 | 0.005699 | 0.043361 | 0.032712 |
| GO-BP | GO:0071415 | cellular response to purine-containing compound                         | 13  | 0.661173 | 1.773613 | 0.005713 | 0.043392 | 0.032735 |
| GO-BP | GO:1904889 | regulation of excitatory synapse assembly                               | 13  | 0.66235  | 1.776772 | 0.005713 | 0.043392 | 0.032735 |
| GO-BP | GO:0030195 | negative regulation of blood coagulation                                | 52  | 0.423335 | 1.624655 | 0.005723 | 0.043429 | 0.032763 |
| GO-BP | GO:0071326 | cellular response to monosaccharide stimulus                            | 129 | 0.329827 | 1.495388 | 0.005738 | 0.04349  | 0.032809 |
| GO-BP | GO:0036289 | peptidyl-serine autophosphorylation                                     | 8   | -0.76074 | -1.79625 | 0.005741 | 0.04349  | 0.032809 |
| GO-BP | GO:2000241 | regulation of reproductive process                                      | 136 | 0.32667  | 1.491781 | 0.005769 | 0.043666 | 0.032941 |
| GO-BP | GO:0045360 | regulation of interleukin-1 biosynthetic process                        | 7   | 0.781199 | 1.731033 | 0.005837 | 0.043996 | 0.033191 |
| GO-BP | GO:0045362 | positive regulation of interleukin-1 biosynthetic process               | 7   | 0.781199 | 1.731033 | 0.005837 | 0.043996 | 0.033191 |
| GO-BP | GO:0050722 | regulation of interleukin-1 beta biosynthetic process                   | 7   | 0.781199 | 1.731033 | 0.005837 | 0.043996 | 0.033191 |
| GO-BP | GO:0050725 | positive regulation of interleukin-1 beta biosynthetic process          | 7   | 0.781199 | 1.731033 | 0.005837 | 0.043996 | 0.033191 |
| GO-BP | GO:0014807 | regulation of somitogenesis                                             | 8   | 0.751701 | 1.733196 | 0.00585  | 0.043996 | 0.033191 |
| GO-BP | GO:0042533 | tumor necrosis factor biosynthetic process                              | 28  | 0.519001 | 1.721532 | 0.005851 | 0.043996 | 0.033191 |
| GO-BP | GO:0042534 | regulation of tumor necrosis factor biosynthetic process                | 28  | 0.519001 | 1.721532 | 0.005851 | 0.043996 | 0.033191 |

|       |            |                                                                      |     |          |          |          |          |          |
|-------|------------|----------------------------------------------------------------------|-----|----------|----------|----------|----------|----------|
| GO-BP | GO:2001171 | positive regulation of ATP biosynthetic process                      | 35  | 0.488132 | 1.71656  | 0.00586  | 0.043996 | 0.033191 |
| GO-BP | GO:0055070 | copper ion homeostasis                                               | 17  | 0.598793 | 1.740947 | 0.005861 | 0.043996 | 0.033191 |
| GO-BP | GO:1905209 | positive regulation of cardiocyte differentiation                    | 26  | 0.532272 | 1.730179 | 0.005863 | 0.043996 | 0.033191 |
| GO-BP | GO:1905953 | negative regulation of lipid localization                            | 41  | 0.458034 | 1.668515 | 0.005899 | 0.044188 | 0.033335 |
| GO-BP | GO:1990573 | potassium ion import across plasma membrane                          | 41  | 0.458643 | 1.670731 | 0.005899 | 0.044188 | 0.033335 |
| GO-BP | GO:0070167 | regulation of biomineral tissue development                          | 87  | 0.368273 | 1.564683 | 0.005914 | 0.04423  | 0.033367 |
| GO-BP | GO:1904357 | negative regulation of telomere maintenance via telomere lengthening | 24  | -0.55154 | -1.78521 | 0.005922 | 0.04423  | 0.033367 |
| GO-BP | GO:0032204 | regulation of telomere maintenance                                   | 75  | -0.38843 | -1.61297 | 0.005932 | 0.04423  | 0.033367 |
| GO-BP | GO:0051147 | regulation of muscle cell differentiation                            | 146 | 0.31979  | 1.477666 | 0.005933 | 0.04423  | 0.033367 |
| GO-BP | GO:0050867 | positive regulation of cell activation                               | 317 | 0.269203 | 1.369567 | 0.005934 | 0.04423  | 0.033367 |
| GO-BP | GO:0071331 | cellular response to hexose stimulus                                 | 128 | 0.331614 | 1.501335 | 0.005935 | 0.04423  | 0.033367 |
| GO-BP | GO:0006869 | lipid transport                                                      | 335 | 0.26725  | 1.367144 | 0.005947 | 0.044239 | 0.033374 |
| GO-BP | GO:0048645 | animal organ formation                                               | 58  | 0.408521 | 1.604621 | 0.005947 | 0.044239 | 0.033374 |
| GO-BP | GO:0031441 | negative regulation of mRNA 3'-end processing                        | 8   | -0.75843 | -1.79079 | 0.005954 | 0.044253 | 0.033385 |
| GO-BP | GO:1902742 | apoptotic process involved in development                            | 35  | 0.486836 | 1.712002 | 0.006049 | 0.044773 | 0.033777 |
| GO-BP | GO:0015698 | inorganic anion transport                                            | 164 | 0.313158 | 1.471828 | 0.006063 | 0.044773 | 0.033777 |
| GO-BP | GO:0060445 | branching involved in salivary gland morphogenesis                   | 22  | 0.55763  | 1.73881  | 0.006063 | 0.044773 | 0.033777 |
| GO-BP | GO:0030322 | stabilization of membrane potential                                  | 16  | 0.611862 | 1.748466 | 0.006066 | 0.044773 | 0.033777 |
| GO-BP | GO:0098659 | inorganic cation import across plasma membrane                       | 77  | 0.387195 | 1.610287 | 0.006068 | 0.044773 | 0.033777 |
| GO-BP | GO:0099587 | inorganic ion import across plasma membrane                          | 77  | 0.387195 | 1.610287 | 0.006068 | 0.044773 | 0.033777 |
| GO-BP | GO:0034330 | cell junction organization                                           | 285 | 0.274949 | 1.385511 | 0.006076 | 0.044773 | 0.033777 |
| GO-BP | GO:0002544 | chronic inflammatory response                                        | 19  | 0.58061  | 1.739704 | 0.006079 | 0.044773 | 0.033777 |
| GO-BP | GO:0051767 | nitric-oxide synthase biosynthetic process                           | 19  | 0.58171  | 1.742998 | 0.006079 | 0.044773 | 0.033777 |
| GO-BP | GO:0051769 | regulation of nitric-oxide synthase biosynthetic process             | 19  | 0.58171  | 1.742998 | 0.006079 | 0.044773 | 0.033777 |
| GO-BP | GO:0071347 | cellular response to interleukin-1                                   | 163 | 0.313782 | 1.473361 | 0.00608  | 0.044773 | 0.033777 |
| GO-BP | GO:0051152 | positive regulation of smooth muscle cell differentiation            | 13  | 0.658043 | 1.765218 | 0.006094 | 0.044797 | 0.033795 |
| GO-BP | GO:0060712 | spongiotrophoblast layer development                                 | 13  | 0.657902 | 1.76484  | 0.006094 | 0.044797 | 0.033795 |
| GO-BP | GO:0072376 | protein activation cascade                                           | 96  | 0.355109 | 1.537292 | 0.0061   | 0.044797 | 0.033795 |
| GO-BP | GO:0051315 | attachment of mitotic spindle                                        | 13  | -0.66227 | -1.81605 | 0.006104 | 0.044797 | 0.033795 |

|       |            |                                                                                   |     |          |          |          |          |          |  |
|-------|------------|-----------------------------------------------------------------------------------|-----|----------|----------|----------|----------|----------|--|
|       |            | microtubules to kinetochore                                                       |     |          |          |          |          |          |  |
| GO-BP | GO:0007043 | cell-cell junction assembly                                                       | 120 | 0.334266 | 1.499258 | 0.006123 | 0.044859 | 0.033842 |  |
| GO-BP | GO:0003231 | cardiac ventricle development                                                     | 128 | 0.330128 | 1.494609 | 0.006127 | 0.044859 | 0.033842 |  |
| GO-BP | GO:0050885 | neuromuscular process controlling balance                                         | 49  | 0.439249 | 1.664023 | 0.006128 | 0.044859 | 0.033842 |  |
| GO-BP | GO:0007063 | regulation of sister chromatid cohesion                                           | 22  | -0.57154 | -1.80905 | 0.006139 | 0.044901 | 0.033874 |  |
| GO-BP | GO:0002857 | positive regulation of natural killer cell mediated immune response to tumor cell | 7   | -0.7759  | -1.76241 | 0.006182 | 0.045179 | 0.034083 |  |
| GO-BP | GO:0007265 | Ras protein signal transduction                                                   | 425 | -0.24955 | -1.31995 | 0.00621  | 0.045344 | 0.034208 |  |
| GO-BP | GO:0050803 | regulation of synapse structure or activity                                       | 215 | 0.289064 | 1.409861 | 0.006219 | 0.045368 | 0.034226 |  |
| GO-BP | GO:0010727 | negative regulation of hydrogen peroxide metabolic process                        | 8   | 0.74949  | 1.728099 | 0.006228 | 0.045368 | 0.034226 |  |
| GO-BP | GO:0034764 | positive regulation of transmembrane transport                                    | 195 | 0.298146 | 1.433911 | 0.006229 | 0.045368 | 0.034226 |  |
| GO-BP | GO:0032024 | positive regulation of insulin secretion                                          | 72  | 0.391401 | 1.609195 | 0.006246 | 0.045459 | 0.034294 |  |
| GO-BP | GO:0043501 | skeletal muscle adaptation                                                        | 25  | 0.533513 | 1.71571  | 0.006263 | 0.045521 | 0.034341 |  |
| GO-BP | GO:0002758 | innate immune response-activating signal transduction                             | 280 | 0.275298 | 1.384571 | 0.006265 | 0.045521 | 0.034341 |  |
| GO-BP | GO:1905818 | regulation of chromosome separation                                               | 61  | -0.40929 | -1.63732 | 0.006275 | 0.045551 | 0.034364 |  |
| GO-BP | GO:0009620 | response to fungus                                                                | 43  | 0.455703 | 1.679067 | 0.006286 | 0.045577 | 0.034384 |  |
| GO-BP | GO:0070997 | neuron death                                                                      | 327 | 0.266993 | 1.363281 | 0.006292 | 0.045577 | 0.034384 |  |
| GO-BP | GO:0050829 | defense response to Gram-negative bacterium                                       | 69  | 0.392989 | 1.598324 | 0.006294 | 0.045577 | 0.034384 |  |
| GO-BP | GO:0090329 | regulation of DNA-dependent DNA replication                                       | 53  | -0.43068 | -1.67115 | 0.006304 | 0.04561  | 0.034408 |  |
| GO-BP | GO:0006267 | pre-replicative complex assembly involved in nuclear cell cycle DNA replication   | 7   | -0.77185 | -1.75322 | 0.006395 | 0.046118 | 0.034791 |  |
| GO-BP | GO:0036388 | pre-replicative complex assembly                                                  | 7   | -0.77185 | -1.75322 | 0.006395 | 0.046118 | 0.034791 |  |
| GO-BP | GO:0043983 | histone H4-K12 acetylation                                                        | 7   | -0.7722  | -1.75401 | 0.006395 | 0.046118 | 0.034791 |  |
| GO-BP | GO:1902299 | pre-replicative complex assembly involved in cell cycle DNA replication           | 7   | -0.77185 | -1.75322 | 0.006395 | 0.046118 | 0.034791 |  |
| GO-BP | GO:0060685 | regulation of prostatic bud formation                                             | 6   | 0.798452 | 1.683359 | 0.006405 | 0.046153 | 0.034818 |  |
| GO-BP | GO:0060441 | epithelial tube branching involved in lung morphogenesis                          | 28  | 0.513965 | 1.704827 | 0.006418 | 0.046202 | 0.034855 |  |
| GO-BP | GO:1904738 | vascular associated smooth muscle cell migration                                  | 23  | 0.543479 | 1.713948 | 0.006454 | 0.046385 | 0.034993 |  |
| GO-BP | GO:1904752 | regulation of vascular associated smooth muscle cell migration                    | 23  | 0.543479 | 1.713948 | 0.006454 | 0.046385 | 0.034993 |  |
| GO-BP | GO:1904706 | negative regulation of vascular                                                   | 19  | 0.579373 | 1.735996 | 0.006459 | 0.046385 | 0.034993 |  |

|       |            |                                                                              |     |          |          |          |          |          |
|-------|------------|------------------------------------------------------------------------------|-----|----------|----------|----------|----------|----------|
|       |            | smooth muscle cell proliferation                                             |     |          |          |          |          |          |
| GO-BP | GO:1901657 | glycosyl compound metabolic process                                          | 140 | -0.32707 | -1.50676 | 0.006469 | 0.046406 | 0.035009 |
| GO-BP | GO:0060993 | kidney morphogenesis                                                         | 93  | 0.358832 | 1.542158 | 0.006472 | 0.046406 | 0.035009 |
| GO-BP | GO:1900047 | negative regulation of hemostasis                                            | 53  | 0.41662  | 1.605316 | 0.006485 | 0.046435 | 0.035031 |
| GO-BP | GO:0043470 | regulation of carbohydrate catabolic process                                 | 85  | 0.369116 | 1.560363 | 0.006487 | 0.046435 | 0.035031 |
| GO-BP | GO:0045061 | thymic T cell selection                                                      | 21  | -0.57718 | -1.80672 | 0.006513 | 0.046578 | 0.035139 |
| GO-BP | GO:0006368 | transcription elongation from RNA polymerase II promoter                     | 80  | -0.37422 | -1.573   | 0.006541 | 0.046746 | 0.035265 |
| GO-BP | GO:0000082 | G1/S transition of mitotic cell cycle                                        | 237 | -0.28401 | -1.40665 | 0.006559 | 0.046828 | 0.035327 |
| GO-BP | GO:0051382 | kinetochore assembly                                                         | 15  | -0.62996 | -1.794   | 0.006564 | 0.046828 | 0.035327 |
| GO-BP | GO:0045292 | mRNA cis splicing, via spliceosome                                           | 28  | -0.52306 | -1.75514 | 0.00659  | 0.046978 | 0.035441 |
| GO-BP | GO:0051590 | positive regulation of neurotransmitter transport                            | 37  | 0.473851 | 1.689724 | 0.006603 | 0.047028 | 0.035478 |
| GO-BP | GO:0010878 | cholesterol storage                                                          | 17  | 0.595908 | 1.73256  | 0.006618 | 0.047096 | 0.03553  |
| GO-BP | GO:0001845 | phagolysosome assembly                                                       | 12  | 0.676791 | 1.775432 | 0.006629 | 0.047138 | 0.035561 |
| GO-BP | GO:0002066 | columnar/cuboidal epithelial cell development                                | 55  | 0.41413  | 1.611494 | 0.006659 | 0.047315 | 0.035694 |
| GO-BP | GO:0071333 | cellular response to glucose stimulus                                        | 126 | 0.328426 | 1.483201 | 0.006688 | 0.047484 | 0.035822 |
| GO-BP | GO:0007498 | mesoderm development                                                         | 120 | 0.332533 | 1.491484 | 0.006697 | 0.047506 | 0.035839 |
| GO-BP | GO:0003044 | regulation of systemic arterial blood pressure mediated by a chemical signal | 49  | 0.437696 | 1.658138 | 0.006702 | 0.047506 | 0.035839 |
| GO-BP | GO:0051169 | nuclear transport                                                            | 321 | -0.2638  | -1.35438 | 0.006714 | 0.047551 | 0.035873 |
| GO-BP | GO:0035725 | sodium ion transmembrane transport                                           | 135 | 0.322649 | 1.471629 | 0.006728 | 0.047591 | 0.035903 |
| GO-BP | GO:0008643 | carbohydrate transport                                                       | 136 | 0.322248 | 1.471588 | 0.006731 | 0.047591 | 0.035903 |
| GO-BP | GO:0032489 | regulation of Cdc42 protein signal transduction                              | 7   | 0.771538 | 1.709625 | 0.006778 | 0.04782  | 0.036076 |
| GO-BP | GO:0048842 | positive regulation of axon extension involved in axon guidance              | 7   | 0.77236  | 1.711447 | 0.006778 | 0.04782  | 0.036076 |
| GO-BP | GO:0098534 | centriole assembly                                                           | 38  | -0.46668 | -1.68393 | 0.00678  | 0.04782  | 0.036076 |
| GO-BP | GO:0008306 | associative learning                                                         | 76  | 0.385672 | 1.600931 | 0.006813 | 0.047982 | 0.036198 |
| GO-BP | GO:0051350 | negative regulation of lyase activity                                        | 22  | 0.548488 | 1.710302 | 0.006821 | 0.047982 | 0.036198 |
| GO-BP | GO:0042033 | chemokine biosynthetic process                                               | 16  | 0.609262 | 1.741035 | 0.006825 | 0.047982 | 0.036198 |
| GO-BP | GO:0050755 | chemokine metabolic process                                                  | 16  | 0.609262 | 1.741035 | 0.006825 | 0.047982 | 0.036198 |
| GO-BP | GO:0007342 | fusion of sperm to egg plasma membrane involved in single fertilization      | 14  | 0.632401 | 1.736316 | 0.006844 | 0.048069 | 0.036263 |
| GO-BP | GO:0110110 | positive regulation of animal organ morphogenesis                            | 79  | 0.381961 | 1.5966   | 0.006848 | 0.048069 | 0.036263 |
| GO-BP | GO:0090382 | phagosome maturation                                                         | 42  | 0.454543 | 1.666305 | 0.00687  | 0.048186 | 0.036351 |
| GO-BP | GO:0001912 | positive regulation of leukocyte mediated cytotoxicity                       | 51  | -0.43165 | -1.66215 | 0.006923 | 0.048478 | 0.036572 |
| GO-BP | GO:1904064 | positive regulation of cation                                                | 136 | 0.321709 | 1.469125 | 0.006923 | 0.048478 | 0.036572 |

|          |               |                                                                                                                             |     |          |          |          |          |          |
|----------|---------------|-----------------------------------------------------------------------------------------------------------------------------|-----|----------|----------|----------|----------|----------|
|          |               | transmembrane transport                                                                                                     |     |          |          |          |          |          |
| GO-BP    | GO:0000959    | mitochondrial RNA metabolic process                                                                                         | 42  | -0.44929 | -1.66141 | 0.00693  | 0.048487 | 0.036579 |
| GO-BP    | GO:0046605    | regulation of centrosome cycle                                                                                              | 55  | -0.42044 | -1.64353 | 0.006953 | 0.048611 | 0.036672 |
| GO-BP    | GO:0055074    | calcium ion homeostasis                                                                                                     | 451 | 0.248856 | 1.315554 | 0.006975 | 0.048721 | 0.036755 |
| GO-BP    | GO:0045823    | positive regulation of heart contraction                                                                                    | 38  | 0.462597 | 1.659668 | 0.007005 | 0.048894 | 0.036886 |
| GO-BP    | GO:0045214    | sarcomere organization                                                                                                      | 50  | 0.431145 | 1.643956 | 0.007044 | 0.049123 | 0.037058 |
| GO-BP    | GO:0070268    | cornification                                                                                                               | 95  | 0.352423 | 1.521718 | 0.007049 | 0.049123 | 0.037058 |
| GO-BP    | GO:0045851    | pH reduction                                                                                                                | 51  | 0.426576 | 1.631468 | 0.007068 | 0.049215 | 0.037128 |
| GO-BP    | GO:0045669    | positive regulation of osteoblast differentiation                                                                           | 58  | 0.406507 | 1.596709 | 0.007098 | 0.049383 | 0.037254 |
| GO-BP    | GO:0045727    | positive regulation of translation                                                                                          | 112 | -0.33914 | -1.51129 | 0.007135 | 0.049606 | 0.037423 |
| GO-BP    | GO:0002639    | positive regulation of immunoglobulin production                                                                            | 41  | -0.45311 | -1.66639 | 0.007162 | 0.049754 | 0.037534 |
| GO-BP    | GO:0045927    | positive regulation of growth                                                                                               | 244 | 0.280637 | 1.388463 | 0.007178 | 0.049807 | 0.037574 |
| GO-BP    | GO:0006892    | post-Golgi vesicle-mediated transport                                                                                       | 102 | -0.35229 | -1.54641 | 0.007182 | 0.049807 | 0.037574 |
| GO-BP    | GO:0031061    | negative regulation of histone methylation                                                                                  | 20  | -0.57206 | -1.76773 | 0.007188 | 0.049807 | 0.037574 |
| GO-BP    | GO:0033555    | multicellular organismal response to stress                                                                                 | 72  | 0.388817 | 1.59857  | 0.007193 | 0.049807 | 0.037574 |
| Reactome | R-HSA-1442490 | Collagen degradation                                                                                                        | 64  | 0.46866  | 1.882141 | 0.000188 | 0.003902 | 0.002972 |
| Reactome | R-HSA-373076  | Class A/I (Rhodopsin-like receptors)                                                                                        | 311 | 0.336925 | 1.721576 | 0.000189 | 0.003902 | 0.002972 |
| Reactome | R-HSA-500792  | GPCR ligand binding                                                                                                         | 432 | 0.350929 | 1.851049 | 0.00019  | 0.003902 | 0.002972 |
| Reactome | R-HSA-1474228 | Degradation of the extracellular matrix                                                                                     | 138 | 0.452687 | 2.07787  | 0.00019  | 0.003902 | 0.002972 |
| Reactome | R-HSA-112316  | Neuronal System                                                                                                             | 396 | 0.327716 | 1.716344 | 0.00019  | 0.003902 | 0.002972 |
| Reactome | R-HSA-1474244 | Extracellular matrix organization                                                                                           | 295 | 0.377301 | 1.915415 | 0.00019  | 0.003902 | 0.002972 |
| Reactome | R-HSA-418594  | G alpha (i) signalling events                                                                                               | 382 | 0.303709 | 1.585055 | 0.00019  | 0.003902 | 0.002972 |
| Reactome | R-HSA-6806942 | MET Receptor Activation                                                                                                     | 6   | 0.917508 | 1.935467 | 0.00019  | 0.003902 | 0.002972 |
| Reactome | R-HSA-418555  | G alpha (s) signalling events                                                                                               | 228 | 0.373224 | 1.835054 | 0.00019  | 0.003902 | 0.002972 |
| Reactome | R-HSA-6798695 | Neutrophil degranulation                                                                                                    | 456 | 0.44449  | 2.356019 | 0.000191 | 0.003902 | 0.002972 |
| Reactome | R-HSA-2173782 | Binding and Uptake of Ligands by Scavenger Receptors                                                                        | 39  | 0.612848 | 2.21532  | 0.000191 | 0.003902 | 0.002972 |
| Reactome | R-HSA-1222556 | ROS and RNS production in phagocytes                                                                                        | 35  | 0.593112 | 2.089038 | 0.000191 | 0.003902 | 0.002972 |
| Reactome | R-HSA-6805567 | Keratinization                                                                                                              | 127 | 0.391273 | 1.77353  | 0.000191 | 0.003902 | 0.002972 |
| Reactome | R-HSA-381753  | Olfactory Signaling Pathway                                                                                                 | 94  | 0.461704 | 1.987109 | 0.000191 | 0.003902 | 0.002972 |
| Reactome | R-HSA-6783783 | Interleukin-10 signaling                                                                                                    | 43  | 0.611163 | 2.258893 | 0.000191 | 0.003902 | 0.002972 |
| Reactome | R-HSA-381426  | Regulation of Insulin-like Growth Factor (IGF) transport and uptake by Insulin-like Growth Factor Binding Proteins (IGFBPs) | 121 | 0.416281 | 1.872661 | 0.000191 | 0.003902 | 0.002972 |
| Reactome | R-HSA-2168880 | Scavenging of heme from plasma                                                                                              | 11  | 0.792756 | 2.032799 | 0.000192 | 0.003902 | 0.002972 |
| Reactome | R-HSA-8957275 | Post-translational protein                                                                                                  | 105 | 0.425087 | 1.862561 | 0.000192 | 0.003902 | 0.002972 |



|          |               |                                                                                    |     |          |          |          |          |          |  |
|----------|---------------|------------------------------------------------------------------------------------|-----|----------|----------|----------|----------|----------|--|
|          |               | phosphorylation                                                                    |     |          |          |          |          |          |  |
| Reactome | R-HSA-5693567 | HDR through Homologous Recombination (HRR) or Single Strand Annealing (SSA)        | 115 | -0.46948 | -2.11586 | 0.000208 | 0.003902 | 0.002972 |  |
| Reactome | R-HSA-69239   | Synthesis of DNA                                                                   | 115 | -0.45051 | -2.03036 | 0.000208 | 0.003902 | 0.002972 |  |
| Reactome | R-HSA-69306   | DNA Replication                                                                    | 123 | -0.4425  | -2.01614 | 0.000208 | 0.003902 | 0.002972 |  |
| Reactome | R-HSA-69618   | Mitotic Spindle Checkpoint                                                         | 107 | -0.49794 | -2.21911 | 0.000208 | 0.003902 | 0.002972 |  |
| Reactome | R-HSA-3214847 | HATs acetylate histones                                                            | 113 | -0.43707 | -1.96364 | 0.000208 | 0.003902 | 0.002972 |  |
| Reactome | R-HSA-2500257 | Resolution of Sister Chromatid Cohesion                                            | 118 | -0.4694  | -2.12285 | 0.000208 | 0.003902 | 0.002972 |  |
| Reactome | R-HSA-72306   | tRNA processing                                                                    | 104 | -0.45551 | -2.02041 | 0.000208 | 0.003902 | 0.002972 |  |
| Reactome | R-HSA-5620912 | Anchoring of the basal body to the plasma membrane                                 | 96  | -0.46936 | -2.05245 | 0.000208 | 0.003902 | 0.002972 |  |
| Reactome | R-HSA-6791226 | Major pathway of rRNA processing in the nucleolus and cytosol                      | 159 | -0.44037 | -2.0786  | 0.000209 | 0.003902 | 0.002972 |  |
| Reactome | R-HSA-73933   | Resolution of Abasic Sites (AP sites)                                              | 38  | -0.60485 | -2.20152 | 0.000209 | 0.003902 | 0.002972 |  |
| Reactome | R-HSA-5693616 | Presynaptic phase of homologous DNA pairing and strand exchange                    | 38  | -0.56378 | -2.05204 | 0.000209 | 0.003902 | 0.002972 |  |
| Reactome | R-HSA-2871809 | FCERI mediated Ca <sup>2+</sup> mobilization                                       | 32  | -0.57844 | -2.0221  | 0.000209 | 0.003902 | 0.002972 |  |
| Reactome | R-HSA-69190   | DNA strand elongation                                                              | 32  | -0.70255 | -2.456   | 0.000209 | 0.003902 | 0.002972 |  |
| Reactome | R-HSA-983705  | Signaling by the B Cell Receptor (BCR)                                             | 108 | -0.47326 | -2.1105  | 0.000209 | 0.003902 | 0.002972 |  |
| Reactome | R-HSA-5656169 | Termination of translesion DNA synthesis                                           | 31  | -0.57417 | -1.98909 | 0.000209 | 0.003902 | 0.002972 |  |
| Reactome | R-HSA-983695  | Antigen activates B Cell Receptor (BCR) leading to generation of second messengers | 31  | -0.65184 | -2.25818 | 0.000209 | 0.003902 | 0.002972 |  |
| Reactome | R-HSA-69206   | G1/S Transition                                                                    | 128 | -0.47942 | -2.19486 | 0.000209 | 0.003902 | 0.002972 |  |
| Reactome | R-HSA-72163   | mRNA Splicing - Major Pathway                                                      | 172 | -0.43291 | -2.06644 | 0.000209 | 0.003902 | 0.002972 |  |
| Reactome | R-HSA-5693538 | Homology Directed Repair                                                           | 121 | -0.47395 | -2.15133 | 0.000209 | 0.003902 | 0.002972 |  |
| Reactome | R-HSA-5617833 | Cilium Assembly                                                                    | 191 | -0.46309 | -2.24334 | 0.00021  | 0.003902 | 0.002972 |  |
| Reactome | R-HSA-68962   | Activation of the pre-replicative complex                                          | 33  | -0.65797 | -2.31448 | 0.00021  | 0.003902 | 0.002972 |  |
| Reactome | R-HSA-69275   | G2/M Transition                                                                    | 183 | -0.39346 | -1.89206 | 0.00021  | 0.003902 | 0.002972 |  |
| Reactome | R-HSA-5633007 | Regulation of TP53 Activity                                                        | 158 | -0.47579 | -2.2416  | 0.00021  | 0.003902 | 0.002972 |  |
| Reactome | R-HSA-69278   | Cell Cycle, Mitotic                                                                | 496 | -0.43194 | -2.31445 | 0.00021  | 0.003902 | 0.002972 |  |
| Reactome | R-HSA-176187  | Activation of ATR in response to replication stress                                | 36  | -0.66271 | -2.3822  | 0.00021  | 0.003902 | 0.002972 |  |
| Reactome | R-HSA-72172   | mRNA Splicing                                                                      | 180 | -0.43386 | -2.0812  | 0.00021  | 0.003902 | 0.002972 |  |
| Reactome | R-HSA-73886   | Chromosome Maintenance                                                             | 89  | -0.49296 | -2.12531 | 0.00021  | 0.003902 | 0.002972 |  |
| Reactome | R-HSA-3247509 | Chromatin modifying enzymes                                                        | 242 | -0.36479 | -1.81975 | 0.00021  | 0.003902 | 0.002972 |  |
| Reactome | R-HSA-4839726 | Chromatin organization                                                             | 242 | -0.36479 | -1.81975 | 0.00021  | 0.003902 | 0.002972 |  |
| Reactome | R-HSA-5696399 | Global Genome Nucleotide Excision Repair (GG-NER)                                  | 82  | -0.45086 | -1.91611 | 0.00021  | 0.003902 | 0.002972 |  |

|          |               |                                                                                   |     |          |          |          |          |          |
|----------|---------------|-----------------------------------------------------------------------------------|-----|----------|----------|----------|----------|----------|
| Reactome | R-HSA-2555396 | Mitotic Metaphase and Anaphase                                                    | 190 | -0.38711 | -1.87252 | 0.00021  | 0.003902 | 0.002972 |
| Reactome | R-HSA-5693579 | Homologous DNA Pairing and Strand Exchange                                        | 41  | -0.57647 | -2.13588 | 0.00021  | 0.003902 | 0.002972 |
| Reactome | R-HSA-69002   | DNA Replication Pre-Initiation                                                    | 82  | -0.45315 | -1.92584 | 0.00021  | 0.003902 | 0.002972 |
| Reactome | R-HSA-3700989 | Transcriptional Regulation by TP53                                                | 353 | -0.33347 | -1.72829 | 0.00021  | 0.003902 | 0.002972 |
| Reactome | R-HSA-68877   | Mitotic Prometaphase                                                              | 189 | -0.51138 | -2.4719  | 0.00021  | 0.003902 | 0.002972 |
| Reactome | R-HSA-68882   | Mitotic Anaphase                                                                  | 189 | -0.3886  | -1.87839 | 0.00021  | 0.003902 | 0.002972 |
| Reactome | R-HSA-8868773 | rRNA processing in the nucleus and cytosol                                        | 168 | -0.44546 | -2.11841 | 0.00021  | 0.003902 | 0.002972 |
| Reactome | R-HSA-453274  | Mitotic G2-G2/M phases                                                            | 185 | -0.39267 | -1.89112 | 0.00021  | 0.003902 | 0.002972 |
| Reactome | R-HSA-6783310 | Fanconi Anemia Pathway                                                            | 35  | -0.55967 | -1.99675 | 0.00021  | 0.003902 | 0.002972 |
| Reactome | R-HSA-5696400 | Dual Incision in GG-NER                                                           | 40  | -0.55633 | -2.04335 | 0.00021  | 0.003902 | 0.002972 |
| Reactome | R-HSA-6804756 | Regulation of TP53 Activity through Phosphorylation                               | 90  | -0.51288 | -2.21362 | 0.00021  | 0.003902 | 0.002972 |
| Reactome | R-HSA-8852135 | Protein ubiquitination                                                            | 76  | -0.46692 | -1.96255 | 0.00021  | 0.003902 | 0.002972 |
| Reactome | R-HSA-69242   | S Phase                                                                           | 157 | -0.46386 | -2.18201 | 0.00021  | 0.003902 | 0.002972 |
| Reactome | R-HSA-453279  | Mitotic G1-G1/S phases                                                            | 146 | -0.42961 | -2.0001  | 0.00021  | 0.003902 | 0.002972 |
| Reactome | R-HSA-72187   | mRNA 3'-end processing                                                            | 49  | -0.52392 | -2.01682 | 0.00021  | 0.003902 | 0.002972 |
| Reactome | R-HSA-72203   | Processing of Capped Intron-Containing Pre-mRNA                                   | 228 | -0.42049 | -2.08105 | 0.00021  | 0.003902 | 0.002972 |
| Reactome | R-HSA-141424  | Amplification of signal from the kinetochores                                     | 92  | -0.53839 | -2.33149 | 0.00021  | 0.003902 | 0.002972 |
| Reactome | R-HSA-141444  | Amplification of signal from unattached kinetochores via a MAD2 inhibitory signal | 92  | -0.53839 | -2.33149 | 0.00021  | 0.003902 | 0.002972 |
| Reactome | R-HSA-69620   | Cell Cycle Checkpoints                                                            | 271 | -0.44995 | -2.26867 | 0.000211 | 0.003902 | 0.002972 |
| Reactome | R-HSA-69205   | G1/S-Specific Transcription                                                       | 28  | -0.62766 | -2.11536 | 0.000211 | 0.003902 | 0.002972 |
| Reactome | R-HSA-69473   | G2/M DNA damage checkpoint                                                        | 81  | -0.4703  | -1.9931  | 0.000211 | 0.003902 | 0.002972 |
| Reactome | R-HSA-110373  | Resolution of AP sites via the multiple-nucleotide patch replacement pathway      | 26  | -0.63799 | -2.11279 | 0.000211 | 0.003902 | 0.002972 |
| Reactome | R-HSA-5663220 | RHO GTPases Activate Formins                                                      | 131 | -0.4184  | -1.91891 | 0.000211 | 0.003902 | 0.002972 |
| Reactome | R-HSA-1852241 | Organelle biogenesis and maintenance                                              | 282 | -0.40456 | -2.04846 | 0.000211 | 0.003902 | 0.002972 |
| Reactome | R-HSA-110320  | Translesion Synthesis by POLH                                                     | 19  | -0.69746 | -2.12493 | 0.000211 | 0.003902 | 0.002972 |
| Reactome | R-HSA-195258  | RHO GTPase Effectors                                                              | 290 | -0.3184  | -1.61787 | 0.000211 | 0.003902 | 0.002972 |
| Reactome | R-HSA-2467813 | Separation of Sister Chromatids                                                   | 178 | -0.40545 | -1.94051 | 0.000211 | 0.003902 | 0.002972 |
| Reactome | R-HSA-72312   | rRNA processing                                                                   | 178 | -0.4476  | -2.14226 | 0.000211 | 0.003902 | 0.002972 |
| Reactome | R-HSA-73894   | DNA Repair                                                                        | 305 | -0.4316  | -2.20352 | 0.000211 | 0.003902 | 0.002972 |
| Reactome | R-HSA-380270  | Recruitment of mitotic centrosome proteins and complexes                          | 77  | -0.49979 | -2.1026  | 0.000211 | 0.003902 | 0.002972 |
| Reactome | R-HSA-380287  | Centrosome maturation                                                             | 77  | -0.49979 | -2.1026  | 0.000211 | 0.003902 | 0.002972 |
| Reactome | R-HSA-174417  | Telomere C-strand (Lagging Strand) Synthesis                                      | 24  | -0.64601 | -2.09334 | 0.000211 | 0.003902 | 0.002972 |
| Reactome | R-HSA-69481   | G2/M Checkpoints                                                                  | 151 | -0.44566 | -2.08386 | 0.000211 | 0.003902 | 0.002972 |

|          |               |                                                                                       |     |          |          |          |          |          |
|----------|---------------|---------------------------------------------------------------------------------------|-----|----------|----------|----------|----------|----------|
| Reactome | R-HSA-5693532 | DNA Double-Strand Break Repair                                                        | 148 | -0.45739 | -2.13297 | 0.000211 | 0.003902 | 0.002972 |
| Reactome | R-HSA-69186   | Lagging Strand Synthesis                                                              | 20  | -0.67739 | -2.09251 | 0.000211 | 0.003902 | 0.002972 |
| Reactome | R-HSA-5693607 | Processing of DNA double-strand break ends                                            | 83  | -0.52263 | -2.22464 | 0.000211 | 0.003902 | 0.002972 |
| Reactome | R-HSA-68886   | M Phase                                                                               | 356 | -0.40073 | -2.07691 | 0.000211 | 0.003902 | 0.002972 |
| Reactome | R-HSA-8866654 | E3 ubiquitin ligases ubiquitinate target proteins                                     | 56  | -0.53715 | -2.12644 | 0.000212 | 0.003902 | 0.002972 |
| Reactome | R-HSA-380259  | Loss of Nlp from mitotic centrosomes                                                  | 68  | -0.48497 | -1.99494 | 0.000212 | 0.003902 | 0.002972 |
| Reactome | R-HSA-380284  | Loss of proteins required for interphase microtubule organization from the centrosome | 68  | -0.48497 | -1.99494 | 0.000212 | 0.003902 | 0.002972 |
| Reactome | R-HSA-8854518 | AURKA Activation by TPX2                                                              | 71  | -0.49067 | -2.03228 | 0.000212 | 0.003902 | 0.002972 |
| Reactome | R-HSA-194315  | Signaling by Rho GTPases                                                              | 413 | -0.28663 | -1.5087  | 0.000212 | 0.003902 | 0.002972 |
| Reactome | R-HSA-380320  | Recruitment of NuMA to mitotic centrosomes                                            | 87  | -0.43718 | -1.8726  | 0.000212 | 0.003902 | 0.002972 |
| Reactome | R-HSA-6790901 | rRNA modification in the nucleus and cytosol                                          | 57  | -0.5245  | -2.0817  | 0.000212 | 0.003902 | 0.002972 |
| Reactome | R-HSA-2565942 | Regulation of PLK1 Activity at G2/M Transition                                        | 86  | -0.49939 | -2.13596 | 0.000212 | 0.003902 | 0.002972 |
| Reactome | R-HSA-5685942 | HDR through Homologous Recombination (HRR)                                            | 64  | -0.49387 | -2.00379 | 0.000214 | 0.003902 | 0.002972 |
| Reactome | R-HSA-73856   | RNA Polymerase II Transcription Termination                                           | 58  | -0.48949 | -1.94692 | 0.000214 | 0.003902 | 0.002972 |
| Reactome | R-HSA-913709  | O-linked glycosylation of mucins                                                      | 61  | 0.466843 | 1.856544 | 0.000378 | 0.00647  | 0.004929 |
| Reactome | R-HSA-425366  | Transport of bile salts and organic acids, metal ions and amine compounds             | 81  | 0.427245 | 1.787344 | 0.000381 | 0.00647  | 0.004929 |
| Reactome | R-HSA-3299685 | Detoxification of Reactive Oxygen Species                                             | 35  | 0.540105 | 1.902341 | 0.000381 | 0.00647  | 0.004929 |
| Reactome | R-HSA-174577  | Activation of C3 and C5                                                               | 5   | 0.906603 | 1.802776 | 0.000381 | 0.00647  | 0.004929 |
| Reactome | R-HSA-375276  | Peptide ligand-binding receptors                                                      | 186 | 0.369604 | 1.771214 | 0.000382 | 0.00647  | 0.004929 |
| Reactome | R-HSA-8963901 | Chylomicron remodeling                                                                | 9   | 0.798634 | 1.922367 | 0.000383 | 0.00647  | 0.004929 |
| Reactome | R-HSA-1296071 | Potassium Channels                                                                    | 96  | 0.435593 | 1.880366 | 0.000384 | 0.00647  | 0.004929 |
| Reactome | R-HSA-6785807 | Interleukin-4 and Interleukin-13 signaling                                            | 106 | 0.40852  | 1.792546 | 0.000385 | 0.00647  | 0.004929 |
| Reactome | R-HSA-5607763 | CLEC7A (Dectin-1) induces NFAT activation                                             | 12  | -0.76556 | -2.06511 | 0.000417 | 0.006484 | 0.004939 |
| Reactome | R-HSA-110313  | Translesion synthesis by Y family DNA polymerases bypasses lesions on DNA template    | 38  | -0.53977 | -1.96465 | 0.000418 | 0.006484 | 0.004939 |
| Reactome | R-HSA-202403  | TCR signaling                                                                         | 110 | -0.42141 | -1.88585 | 0.000418 | 0.006484 | 0.004939 |
| Reactome | R-HSA-73893   | DNA Damage Bypass                                                                     | 47  | -0.52322 | -1.99308 | 0.00042  | 0.006484 | 0.004939 |
| Reactome | R-HSA-73762   | RNA Polymerase I Transcription Initiation                                             | 46  | -0.51688 | -1.95963 | 0.000421 | 0.006484 | 0.004939 |

|          |               |                                                                     |     |          |          |          |          |          |
|----------|---------------|---------------------------------------------------------------------|-----|----------|----------|----------|----------|----------|
| Reactome | R-HSA-180786  | Extension of Telomeres                                              | 29  | -0.59888 | -2.03853 | 0.000421 | 0.006484 | 0.004939 |
| Reactome | R-HSA-202433  | Generation of second messenger molecules                            | 29  | -0.58735 | -1.99929 | 0.000421 | 0.006484 | 0.004939 |
| Reactome | R-HSA-1538133 | G0 and Early G1                                                     | 27  | -0.60079 | -2.00899 | 0.000422 | 0.006484 | 0.004939 |
| Reactome | R-HSA-72202   | Transport of Mature Transcript to Cytoplasm                         | 73  | -0.4312  | -1.79921 | 0.000423 | 0.006484 | 0.004939 |
| Reactome | R-HSA-73884   | Base Excision Repair                                                | 74  | -0.45601 | -1.90592 | 0.000424 | 0.006484 | 0.004939 |
| Reactome | R-HSA-388841  | Costimulation by the CD28 family                                    | 65  | -0.46981 | -1.91171 | 0.000427 | 0.006484 | 0.004939 |
| Reactome | R-HSA-112315  | Transmission across Chemical Synapses                               | 259 | 0.307286 | 1.533962 | 0.000569 | 0.008192 | 0.006241 |
| Reactome | R-HSA-5576891 | Cardiac conduction                                                  | 138 | 0.351514 | 1.613477 | 0.00057  | 0.008192 | 0.006241 |
| Reactome | R-HSA-449147  | Signaling by Interleukins                                           | 438 | 0.274903 | 1.451068 | 0.000572 | 0.008192 | 0.006241 |
| Reactome | R-HSA-373080  | Class B/2 (Secretin family receptors)                               | 90  | 0.406975 | 1.73782  | 0.000572 | 0.008192 | 0.006241 |
| Reactome | R-HSA-1592389 | Activation of Matrix Metalloproteinases                             | 31  | 0.569029 | 1.944702 | 0.000575 | 0.008192 | 0.006241 |
| Reactome | R-HSA-211859  | Biological oxidations                                               | 193 | 0.334082 | 1.607719 | 0.000575 | 0.008192 | 0.006241 |
| Reactome | R-HSA-112314  | Neurotransmitter receptors and postsynaptic signal transmission     | 194 | 0.335104 | 1.614198 | 0.000575 | 0.008192 | 0.006241 |
| Reactome | R-HSA-425407  | SLC-mediated transmembrane transport                                | 239 | 0.322219 | 1.591369 | 0.000578 | 0.008192 | 0.006241 |
| Reactome | R-HSA-8953750 | Transcriptional Regulation by E2F6                                  | 33  | -0.54787 | -1.92721 | 0.000629 | 0.008535 | 0.006502 |
| Reactome | R-HSA-5620920 | Cargo trafficking to the periciliary membrane                       | 48  | -0.48458 | -1.85671 | 0.000631 | 0.008535 | 0.006502 |
| Reactome | R-HSA-72766   | Translation                                                         | 265 | -0.30368 | -1.52831 | 0.000633 | 0.008535 | 0.006502 |
| Reactome | R-HSA-5688426 | Deubiquitination                                                    | 256 | -0.30486 | -1.52848 | 0.000633 | 0.008535 | 0.006502 |
| Reactome | R-HSA-5689880 | Ub-specific processing proteases                                    | 179 | -0.3374  | -1.61603 | 0.000633 | 0.008535 | 0.006502 |
| Reactome | R-HSA-170834  | Signaling by TGF-beta Receptor Complex                              | 72  | -0.425   | -1.76515 | 0.000635 | 0.008535 | 0.006502 |
| Reactome | R-HSA-3108214 | SUMOylation of DNA damage response and repair proteins              | 74  | -0.43383 | -1.8132  | 0.000636 | 0.008535 | 0.006502 |
| Reactome | R-HSA-157579  | Telomere Maintenance                                                | 64  | -0.45202 | -1.83397 | 0.000642 | 0.008542 | 0.006507 |
| Reactome | R-HSA-163125  | Post-translational modification: synthesis of GPI-anchored proteins | 84  | 0.402248 | 1.694096 | 0.000761 | 0.009761 | 0.007436 |
| Reactome | R-HSA-5621480 | Dectin-2 family                                                     | 25  | 0.600686 | 1.944887 | 0.000762 | 0.009761 | 0.007436 |
| Reactome | R-HSA-1474290 | Collagen formation                                                  | 90  | 0.40094  | 1.712048 | 0.000763 | 0.009761 | 0.007436 |
| Reactome | R-HSA-977443  | GABA receptor activation                                            | 54  | 0.46601  | 1.809084 | 0.000763 | 0.009761 | 0.007436 |
| Reactome | R-HSA-211945  | Phase I - Functionalization of compounds                            | 101 | 0.387258 | 1.687324 | 0.000767 | 0.009761 | 0.007436 |
| Reactome | R-HSA-549132  | Organic cation/anion/zwitterion transport                           | 13  | 0.726721 | 1.95548  | 0.000767 | 0.009761 | 0.007436 |
| Reactome | R-HSA-5620924 | Intraflagellar transport                                            | 51  | -0.47154 | -1.83378 | 0.000836 | 0.010277 | 0.007829 |
| Reactome | R-HSA-5685938 | HDR through Single Strand Annealing (SSA)                           | 36  | -0.52997 | -1.90505 | 0.000839 | 0.010277 | 0.007829 |
| Reactome | R-HSA-606279  | Deposition of new CENPA-containing                                  | 54  | -0.47499 | -1.8689  | 0.000841 | 0.010277 | 0.007829 |

|          |               |                                                                                |     |          |          |          |          |          |
|----------|---------------|--------------------------------------------------------------------------------|-----|----------|----------|----------|----------|----------|
|          |               | nucleosomes at the centromere                                                  |     |          |          |          |          |          |
| Reactome | R-HSA-774815  | Nucleosome assembly                                                            | 54  | -0.47499 | -1.8689  | 0.000841 | 0.010277 | 0.007829 |
| Reactome | R-HSA-5693571 | Nonhomologous End-Joining (NHEJ)                                               | 55  | -0.47944 | -1.89268 | 0.000842 | 0.010277 | 0.007829 |
| Reactome | R-HSA-1362277 | Transcription of E2F targets under negative control by DREAM complex           | 19  | -0.65976 | -2.01007 | 0.000844 | 0.010277 | 0.007829 |
| Reactome | R-HSA-418990  | Adherens junctions interactions                                                | 31  | 0.551485 | 1.884743 | 0.000958 | 0.01151  | 0.008768 |
| Reactome | R-HSA-917977  | Transferrin endocytosis and recycling                                          | 31  | 0.553313 | 1.89099  | 0.000958 | 0.01151  | 0.008768 |
| Reactome | R-HSA-212165  | Epigenetic regulation of gene expression                                       | 124 | -0.38276 | -1.74721 | 0.001039 | 0.012397 | 0.009444 |
| Reactome | R-HSA-159236  | Transport of Mature mRNA derived from an Intron-Containing Transcript          | 65  | -0.4353  | -1.77127 | 0.001068 | 0.012657 | 0.009642 |
| Reactome | R-HSA-975634  | Retinoid metabolism and transport                                              | 43  | 0.483375 | 1.786581 | 0.001147 | 0.013326 | 0.010151 |
| Reactome | R-HSA-977444  | GABA B receptor activation                                                     | 37  | 0.505485 | 1.802361 | 0.001149 | 0.013326 | 0.010151 |
| Reactome | R-HSA-991365  | Activation of GABAB receptors                                                  | 37  | 0.505485 | 1.802361 | 0.001149 | 0.013326 | 0.010151 |
| Reactome | R-HSA-5173105 | O-linked glycosylation                                                         | 107 | 0.385812 | 1.694823 | 0.001155 | 0.013326 | 0.010151 |
| Reactome | R-HSA-110314  | Recognition of DNA damage by PCNA-containing replication complex               | 30  | -0.56036 | -1.92927 | 0.001251 | 0.014154 | 0.010783 |
| Reactome | R-HSA-5696398 | Nucleotide Excision Repair                                                     | 108 | -0.38418 | -1.71324 | 0.001254 | 0.014154 | 0.010783 |
| Reactome | R-HSA-5696395 | Formation of Incision Complex in GG-NER                                        | 41  | -0.4968  | -1.84068 | 0.00126  | 0.014154 | 0.010783 |
| Reactome | R-HSA-6782315 | tRNA modification in the nucleus and cytosol                                   | 41  | -0.4967  | -1.84033 | 0.00126  | 0.014154 | 0.010783 |
| Reactome | R-HSA-201722  | Formation of the beta-catenin:TCF transactivating complex                      | 67  | -0.4305  | -1.76597 | 0.001273 | 0.014203 | 0.01082  |
| Reactome | R-HSA-77387   | Insulin receptor recycling                                                     | 26  | 0.585548 | 1.918996 | 0.001332 | 0.014772 | 0.011253 |
| Reactome | R-HSA-156827  | L13a-mediated translational silencing of Ceruloplasmin expression              | 92  | -0.4001  | -1.73262 | 0.001473 | 0.015807 | 0.012041 |
| Reactome | R-HSA-6804760 | Regulation of TP53 Activity through Methylation                                | 19  | -0.64196 | -1.95583 | 0.001476 | 0.015807 | 0.012041 |
| Reactome | R-HSA-69183   | Processive synthesis on the lagging strand                                     | 15  | -0.68778 | -1.96359 | 0.001481 | 0.015807 | 0.012041 |
| Reactome | R-HSA-68949   | Orc1 removal from chromatin                                                    | 68  | -0.42194 | -1.73566 | 0.001482 | 0.015807 | 0.012041 |
| Reactome | R-HSA-5686938 | Regulation of TLR by endogenous ligand                                         | 17  | 0.653113 | 1.907629 | 0.001512 | 0.015807 | 0.012041 |
| Reactome | R-HSA-1296041 | Activation of G protein gated Potassium channels                               | 23  | 0.599694 | 1.902541 | 0.001514 | 0.015807 | 0.012041 |
| Reactome | R-HSA-1296059 | G protein gated Potassium channels                                             | 23  | 0.599694 | 1.902541 | 0.001514 | 0.015807 | 0.012041 |
| Reactome | R-HSA-997272  | Inhibition of voltage gated Ca <sup>2+</sup> channels via Gbeta/gamma subunits | 23  | 0.599694 | 1.902541 | 0.001514 | 0.015807 | 0.012041 |
| Reactome | R-HSA-166663  | Initial triggering of complement                                               | 20  | 0.635829 | 1.938192 | 0.001519 | 0.015807 | 0.012041 |
| Reactome | R-HSA-1296065 | Inwardly rectifying K <sup>+</sup> channels                                    | 29  | 0.550509 | 1.852839 | 0.001523 | 0.015807 | 0.012041 |
| Reactome | R-HSA-74713   | IRS activation                                                                 | 5   | 0.876875 | 1.743661 | 0.001526 | 0.015807 | 0.012041 |
| Reactome | R-HSA-72706   | GTP hydrolysis and joining of the                                              | 93  | -0.39178 | -1.70133 | 0.00168  | 0.016956 | 0.012917 |

## 60S ribosomal subunit

|          |               |                                                                                                           |     |          |          |          |          |          |
|----------|---------------|-----------------------------------------------------------------------------------------------------------|-----|----------|----------|----------|----------|----------|
| Reactome | R-HSA-1483255 | PI Metabolism                                                                                             | 80  | -0.40848 | -1.72875 | 0.001681 | 0.016956 | 0.012917 |
| Reactome | R-HSA-5696397 | Gap-filling DNA repair synthesis and ligation in GG-NER                                                   | 25  | -0.57424 | -1.88506 | 0.001682 | 0.016956 | 0.012917 |
| Reactome | R-HSA-5651801 | PCNA-Dependent Long Patch Base Excision Repair                                                            | 21  | -0.62077 | -1.94343 | 0.001685 | 0.016956 | 0.012917 |
| Reactome | R-HSA-1168372 | Downstream signaling events of B Cell Receptor (BCR)                                                      | 79  | -0.40854 | -1.72356 | 0.001693 | 0.016956 | 0.012917 |
| Reactome | R-HSA-5693565 | Recruitment and ATM-mediated phosphorylation of repair and signaling proteins at DNA double strand breaks | 63  | -0.43137 | -1.74586 | 0.001696 | 0.016956 | 0.012917 |
| Reactome | R-HSA-176974  | Unwinding of DNA                                                                                          | 12  | -0.74234 | -2.00247 | 0.001875 | 0.018104 | 0.013792 |
| Reactome | R-HSA-6806003 | Regulation of TP53 Expression and Degradation                                                             | 37  | -0.49898 | -1.80493 | 0.001882 | 0.018104 | 0.013792 |
| Reactome | R-HSA-8939245 | RUNX1 regulates transcription of genes involved in BCR signaling                                          | 5   | -0.87543 | -1.78972 | 0.001891 | 0.018104 | 0.013792 |
| Reactome | R-HSA-429914  | Deadenylation-dependent mRNA decay                                                                        | 55  | -0.45261 | -1.78677 | 0.001894 | 0.018104 | 0.013792 |
| Reactome | R-HSA-113510  | E2F mediated regulation of DNA replication                                                                | 21  | -0.61658 | -1.93032 | 0.001895 | 0.018104 | 0.013792 |
| Reactome | R-HSA-5638302 | Signaling by Overexpressed Wild-Type EGFR in Cancer                                                       | 7   | 0.814701 | 1.809371 | 0.001907 | 0.018104 | 0.013792 |
| Reactome | R-HSA-5638303 | Inhibition of Signaling by Overexpressed EGFR                                                             | 7   | 0.814701 | 1.809371 | 0.001907 | 0.018104 | 0.013792 |
| Reactome | R-HSA-5655862 | Translesion synthesis by POLK                                                                             | 17  | -0.65714 | -1.93936 | 0.00191  | 0.018104 | 0.013792 |
| Reactome | R-HSA-5656121 | Translesion synthesis by POLI                                                                             | 17  | -0.6598  | -1.94722 | 0.00191  | 0.018104 | 0.013792 |
| Reactome | R-HSA-2672351 | Stimuli-sensing channels                                                                                  | 101 | 0.373185 | 1.626009 | 0.001918 | 0.018104 | 0.013792 |
| Reactome | R-HSA-5693606 | DNA Double Strand Break Response                                                                          | 64  | -0.4292  | -1.74138 | 0.001926 | 0.018104 | 0.013792 |
| Reactome | R-HSA-211897  | Cytochrome P450 - arranged by substrate type                                                              | 61  | 0.429441 | 1.707804 | 0.002079 | 0.019438 | 0.014808 |
| Reactome | R-HSA-2454202 | Fc epsilon receptor (FCER1) signaling                                                                     | 128 | -0.36075 | -1.65156 | 0.002091 | 0.01945  | 0.014817 |
| Reactome | R-HSA-983712  | Ion channel transport                                                                                     | 178 | 0.316735 | 1.507882 | 0.002281 | 0.021102 | 0.016075 |
| Reactome | R-HSA-191859  | snRNP Assembly                                                                                            | 51  | -0.44778 | -1.74135 | 0.002509 | 0.022605 | 0.01722  |
| Reactome | R-HSA-194441  | Metabolism of non-coding RNA                                                                              | 51  | -0.44778 | -1.74135 | 0.002509 | 0.022605 | 0.01722  |
| Reactome | R-HSA-174411  | Polymerase switching on the C-strand of the telomere                                                      | 14  | -0.67535 | -1.89607 | 0.00252  | 0.022605 | 0.01722  |
| Reactome | R-HSA-69091   | Polymerase switching                                                                                      | 14  | -0.67535 | -1.89607 | 0.00252  | 0.022605 | 0.01722  |
| Reactome | R-HSA-69109   | Leading Strand Synthesis                                                                                  | 14  | -0.67535 | -1.89607 | 0.00252  | 0.022605 | 0.01722  |
| Reactome | R-HSA-162906  | HIV Infection                                                                                             | 220 | -0.29598 | -1.45918 | 0.002524 | 0.022605 | 0.01722  |
| Reactome | R-HSA-9603798 | Class I peroxisomal membrane protein import                                                               | 20  | -0.61682 | -1.90538 | 0.002535 | 0.022605 | 0.01722  |
| Reactome | R-HSA-549127  | Organic cation transport                                                                                  | 8   | 0.77976  | 1.807753 | 0.002655 | 0.02355  | 0.01794  |
| Reactome | R-HSA-72689   | Formation of a pool of free 40S                                                                           | 83  | -0.39718 | -1.69063 | 0.002748 | 0.024254 | 0.018476 |

|          |               | subunits                                                                  |     |          |          |          |          |          |  |
|----------|---------------|---------------------------------------------------------------------------|-----|----------|----------|----------|----------|----------|--|
| Reactome | R-HSA-5576886 | Phase 4 - resting membrane potential                                      | 17  | 0.634221 | 1.852449 | 0.002836 | 0.024901 | 0.018969 |  |
| Reactome | R-HSA-2514853 | Condensation of Prometaphase Chromosomes                                  | 11  | -0.74003 | -1.9377  | 0.00292  | 0.025511 | 0.019434 |  |
| Reactome | R-HSA-983168  | Antigen processing: Ubiquitination & Proteasome degradation               | 295 | -0.27612 | -1.40537 | 0.002953 | 0.025671 | 0.019556 |  |
| Reactome | R-HSA-1187000 | Fertilization                                                             | 22  | 0.586674 | 1.836744 | 0.003035 | 0.026257 | 0.020002 |  |
| Reactome | R-HSA-110312  | Translesion synthesis by REV1                                             | 16  | -0.65261 | -1.89521 | 0.00318  | 0.02737  | 0.02085  |  |
| Reactome | R-HSA-69166   | Removal of the Flap Intermediate                                          | 14  | -0.66819 | -1.87598 | 0.00336  | 0.028776 | 0.021921 |  |
| Reactome | R-HSA-1300645 | Acrosome Reaction and Sperm:Oocyte Membrane Binding                       | 5   | 0.858768 | 1.707656 | 0.003433 | 0.029258 | 0.022288 |  |
| Reactome | R-HSA-6782210 | Gap-filling DNA repair synthesis and ligation in TC-NER                   | 63  | -0.41522 | -1.6805  | 0.003603 | 0.030557 | 0.023278 |  |
| Reactome | R-HSA-6809371 | Formation of the cornified envelope                                       | 98  | 0.359729 | 1.55985  | 0.003635 | 0.030676 | 0.023368 |  |
| Reactome | R-HSA-2142753 | Arachidonic acid metabolism                                               | 58  | 0.42967  | 1.696427 | 0.003749 | 0.031483 | 0.023983 |  |
| Reactome | R-HSA-2990846 | SUMOylation                                                               | 176 | -0.31421 | -1.50333 | 0.003789 | 0.031577 | 0.024055 |  |
| Reactome | R-HSA-4420332 | Defective B3GALT6 causes EDSP2 and SEMDJL1                                | 20  | 0.588557 | 1.794093 | 0.003797 | 0.031577 | 0.024055 |  |
| Reactome | R-HSA-202424  | Downstream TCR signaling                                                  | 89  | -0.38557 | -1.66233 | 0.003986 | 0.032992 | 0.025133 |  |
| Reactome | R-HSA-6782135 | Dual incision in TC-NER                                                   | 64  | -0.4059  | -1.64687 | 0.004065 | 0.033488 | 0.025511 |  |
| Reactome | R-HSA-6784531 | tRNA processing in the nucleus                                            | 56  | -0.42237 | -1.67205 | 0.004231 | 0.03469  | 0.026427 |  |
| Reactome | R-HSA-68867   | Assembly of the pre-replicative complex                                   | 65  | -0.40124 | -1.63268 | 0.004273 | 0.034866 | 0.02656  |  |
| Reactome | R-HSA-68884   | Mitotic Telophase/Cytokinesis                                             | 13  | -0.67524 | -1.85964 | 0.004385 | 0.03549  | 0.027036 |  |
| Reactome | R-HSA-166658  | Complement cascade                                                        | 53  | 0.433442 | 1.676817 | 0.00439  | 0.03549  | 0.027036 |  |
| Reactome | R-HSA-72764   | Eukaryotic Translation Termination                                        | 75  | -0.3902  | -1.63585 | 0.004429 | 0.035642 | 0.027151 |  |
| Reactome | R-HSA-375280  | Amine ligand-binding receptors                                            | 41  | 0.453569 | 1.656619 | 0.00458  | 0.036434 | 0.027755 |  |
| Reactome | R-HSA-977606  | Regulation of Complement cascade                                          | 42  | 0.452763 | 1.662574 | 0.00459  | 0.036434 | 0.027755 |  |
| Reactome | R-HSA-927802  | Nonsense-Mediated Decay (NMD)                                             | 94  | -0.37258 | -1.6216  | 0.004612 | 0.036434 | 0.027755 |  |
| Reactome | R-HSA-975957  | Nonsense Mediated Decay (NMD) enhanced by the Exon Junction Complex (EJC) | 94  | -0.37258 | -1.6216  | 0.004612 | 0.036434 | 0.027755 |  |
| Reactome | R-HSA-3560783 | Defective B4GALT7 causes EDS, progeroid type                              | 20  | 0.582637 | 1.776048 | 0.004746 | 0.037318 | 0.028428 |  |
| Reactome | R-HSA-379724  | tRNA Aminoacylation                                                       | 39  | -0.47665 | -1.74235 | 0.004835 | 0.037848 | 0.028833 |  |
| Reactome | R-HSA-912631  | Regulation of signaling by CBL                                            | 22  | -0.56637 | -1.79638 | 0.004862 | 0.037885 | 0.02886  |  |
| Reactome | R-HSA-1650814 | Collagen biosynthesis and modifying enzymes                               | 67  | 0.399567 | 1.616242 | 0.004918 | 0.038151 | 0.029063 |  |
| Reactome | R-HSA-6804757 | Regulation of TP53 Degradation                                            | 36  | -0.48447 | -1.74151 | 0.005033 | 0.038867 | 0.029609 |  |
| Reactome | R-HSA-434316  | Fatty Acids bound to GPR40 (FFAR1) regulate insulin secretion             | 8   | 0.748117 | 1.734393 | 0.005119 | 0.039233 | 0.029888 |  |
| Reactome | R-HSA-2142691 | Synthesis of Leukotrienes (LT) and Eoxins (EX)                            | 20  | 0.578146 | 1.762358 | 0.005125 | 0.039233 | 0.029888 |  |
| Reactome | R-HSA-379726  | Mitochondrial tRNA aminoacylation                                         | 19  | -0.60188 | -1.83373 | 0.005272 | 0.040179 | 0.030608 |  |

|          |               |                                                                              |     |          |          |          |          |          |
|----------|---------------|------------------------------------------------------------------------------|-----|----------|----------|----------|----------|----------|
| Reactome | R-HSA-69052   | Switching of origins to a post-replicative state                             | 86  | -0.37975 | -1.62425 | 0.005312 | 0.040283 | 0.030687 |
| Reactome | R-HSA-8857538 | PTK6 promotes HIF1A stabilization                                            | 6   | 0.806405 | 1.701097 | 0.005332 | 0.040283 | 0.030687 |
| Reactome | R-HSA-400451  | Free fatty acids regulate insulin secretion                                  | 11  | 0.684095 | 1.754171 | 0.005377 | 0.040447 | 0.030812 |
| Reactome | R-HSA-5358508 | Mismatch Repair                                                              | 14  | -0.65604 | -1.84186 | 0.00546  | 0.04089  | 0.03115  |
| Reactome | R-HSA-73864   | RNA Polymerase I Transcription                                               | 87  | -0.37462 | -1.60464 | 0.005517 | 0.041137 | 0.031338 |
| Reactome | R-HSA-1500931 | Cell-Cell communication                                                      | 124 | 0.335171 | 1.512174 | 0.005588 | 0.041431 | 0.031562 |
| Reactome | R-HSA-113507  | E2F-enabled inhibition of pre-replication complex formation                  | 9   | -0.72896 | -1.79776 | 0.005649 | 0.041431 | 0.031562 |
| Reactome | R-HSA-421270  | Cell-cell junction organization                                              | 61  | 0.407169 | 1.61923  | 0.005669 | 0.041431 | 0.031562 |
| Reactome | R-HSA-159418  | Recycling of bile acids and salts                                            | 16  | 0.611873 | 1.756427 | 0.005676 | 0.041431 | 0.031562 |
| Reactome | R-HSA-983170  | Antigen Presentation: Folding, assembly and peptide loading of class I MHC   | 25  | -0.54215 | -1.77972 | 0.005678 | 0.041431 | 0.031562 |
| Reactome | R-HSA-975956  | Nonsense Mediated Decay (NMD) independent of the Exon Junction Complex (EJC) | 77  | -0.3874  | -1.62977 | 0.0057   | 0.041431 | 0.031562 |
| Reactome | R-HSA-5602498 | MyD88 deficiency (TLR2/4)                                                    | 10  | 0.704292 | 1.758617 | 0.005747 | 0.041601 | 0.031691 |
| Reactome | R-HSA-4641265 | Repression of WNT target genes                                               | 12  | -0.67744 | -1.82741 | 0.005832 | 0.04204  | 0.032025 |
| Reactome | R-HSA-168179  | Toll Like Receptor TLR1:TLR2 Cascade                                         | 92  | 0.360472 | 1.546616 | 0.006094 | 0.043565 | 0.033187 |
| Reactome | R-HSA-181438  | Toll Like Receptor 2 (TLR2) Cascade                                          | 92  | 0.360472 | 1.546616 | 0.006094 | 0.043565 | 0.033187 |
| Reactome | R-HSA-73854   | RNA Polymerase I Promoter Clearance                                          | 85  | -0.37327 | -1.59509 | 0.006361 | 0.045288 | 0.0345   |
| Reactome | R-HSA-397014  | Muscle contraction                                                           | 205 | 0.290791 | 1.411054 | 0.006489 | 0.046005 | 0.035046 |
| Reactome | R-HSA-1660499 | Synthesis of PIPs at the plasma membrane                                     | 50  | -0.42658 | -1.6511  | 0.006934 | 0.048964 | 0.0373   |

---
